# Supplementary material for: Mechanism of a cobalt-catalyzed hydroarylation reaction and origin of stereoselectivity
Source: Royal Society of Chemistry journal article supplement (doi:10.1039/d2cy00780k), 2022-01-01
Supplement: d2cy00780k1.pdf [file d2cy00780k1.pdf]

## Electronic Supplementary Information For

### Mechanism and origin of stereoselectivity on cobalt-catalyzed hydroarylation reaction

Yang Wang<sup>a,\*</sup>, Kaili Gong<sup>a</sup>, Han Zhang<sup>a</sup>, Yue Liu<sup>a</sup>, Donghui Wei<sup>b,\*</sup>

Content

Part 1: Substituent effect .....S2

Part 2: Cartesian Coordinates and energies for all the stationary points .....S3

---

\*Corresponding Authors: [wangyang@zzuli.edu.cn](mailto:wangyang@zzuli.edu.cn) (Y. Wang) and [donghuiwei@zzu.edu.cn](mailto:donghuiwei@zzu.edu.cn) (D. H. Wei)

## Part 1: Substituent effect

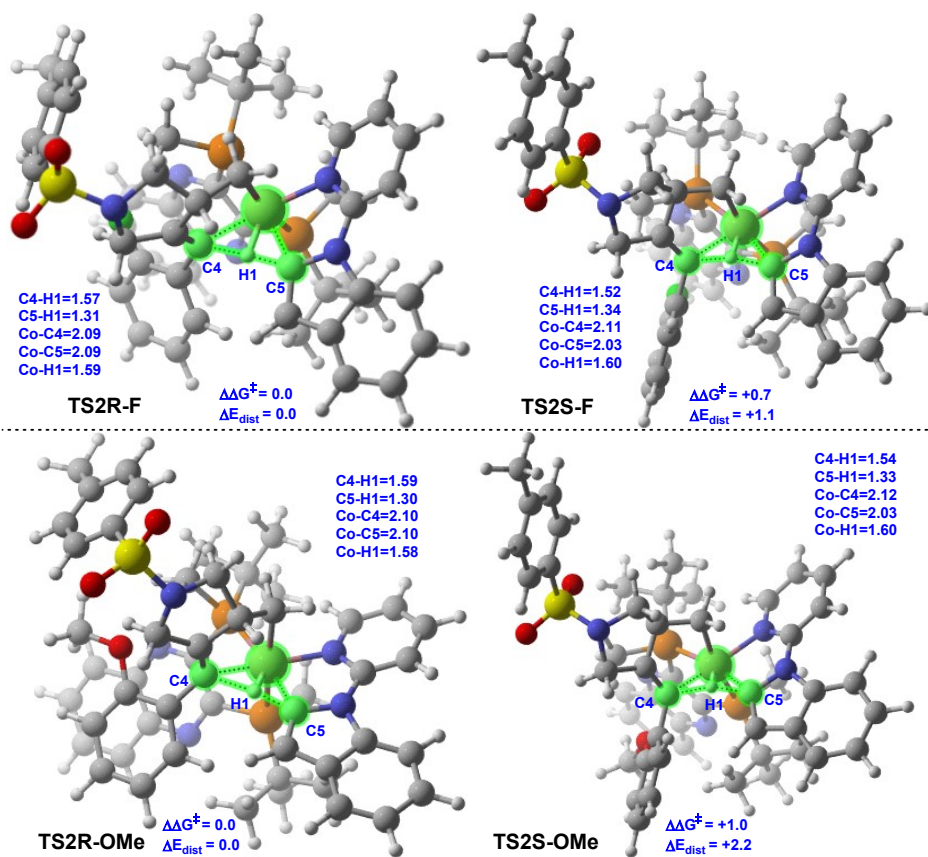

Fig. S1 Substituent effects on the stereoselectivity

## Part 2: Cartesian Coordinates and energies for all the stationary points

### R1

|                                              |             |             |                             |
|----------------------------------------------|-------------|-------------|-----------------------------|
| Zero-point correction=                       |             |             | 0.336478 (Hartree/Particle) |
| Thermal correction to Energy=                |             |             | 0.358476                    |
| Thermal correction to Enthalpy=              |             |             | 0.359420                    |
| Thermal correction to Gibbs Free Energy=     |             |             | 0.282706                    |
| Sum of electronic and zero-point Energies=   |             |             | -1338.296738                |
| Sum of electronic and thermal Energies=      |             |             | -1338.274740                |
| Sum of electronic and thermal Enthalpies=    |             |             | -1338.273796                |
| Sum of electronic and thermal Free Energies= |             |             | -1338.350510                |
| C                                            | -6.27459600 | 1.68650500  | -0.10318800                 |
| C                                            | -4.88849200 | 1.59580700  | -0.10622100                 |
| C                                            | -4.25657400 | 0.39392300  | -0.47448800                 |
| C                                            | -5.04944600 | -0.71034300 | -0.83518800                 |
| C                                            | -6.43508300 | -0.61020500 | -0.82484200                 |
| C                                            | -7.05213900 | 0.58589300  | -0.46118200                 |
| H                                            | -6.75092300 | 2.62045200  | 0.18218900                  |
| H                                            | -4.27961700 | 2.45032500  | 0.17450600                  |
| H                                            | -4.56540200 | -1.64006600 | -1.12026500                 |
| H                                            | -7.03670700 | -1.47054600 | -1.10371600                 |
| H                                            | -8.13587200 | 0.66000700  | -0.45621100                 |
| C                                            | -2.83699100 | 0.30207200  | -0.47942700                 |
| C                                            | -1.62361500 | 0.23392600  | -0.45734700                 |
| C                                            | -0.17222600 | 0.18522600  | -0.47732400                 |
| H                                            | 0.24341600  | 1.15809100  | -0.16926400                 |
| H                                            | 0.16431200  | 0.00322500  | -1.50347400                 |
| N                                            | 0.36756500  | -0.89118200 | 0.38331500                  |
| C                                            | 0.50165800  | -0.50882000 | 1.80303800                  |
| H                                            | 1.01152000  | -1.33905100 | 2.30270100                  |
| H                                            | 1.12826800  | 0.39261900  | 1.90741500                  |
| C                                            | -0.82928500 | -0.28043000 | 2.43835200                  |
| C                                            | -1.14259800 | 0.82832300  | 3.10634300                  |
| H                                            | -1.54571100 | -1.09676800 | 2.35057700                  |
| H                                            | -2.10584900 | 0.94745700  | 3.59391800                  |
| H                                            | -0.43995400 | 1.65535900  | 3.19384200                  |
| S                                            | 1.71898900  | -1.68011700 | -0.26521500                 |
| O                                            | 2.08893800  | -2.69996900 | 0.71244000                  |
| O                                            | 1.35948400  | -2.03804100 | -1.63498400                 |
| C                                            | 3.02084100  | -0.47434300 | -0.33691400                 |
| C                                            | 3.77584000  | -0.20870900 | 0.80637100                  |

|   |            |             |             |
|---|------------|-------------|-------------|
| C | 3.22679800 | 0.24605000  | -1.51462400 |
| C | 4.74612900 | 0.78556700  | 0.75945900  |
| H | 3.61411500 | -0.78415100 | 1.71354700  |
| C | 4.20678300 | 1.22927000  | -1.54385000 |
| H | 2.63628600 | 0.02350900  | -2.39834500 |
| C | 4.97965700 | 1.51711200  | -0.41081800 |
| H | 5.34003700 | 0.99606200  | 1.64544400  |
| H | 4.37900600 | 1.78568600  | -2.46218600 |
| C | 6.04749000 | 2.56228000  | -0.46358900 |
| H | 5.71587900 | 3.45070300  | -1.00889600 |
| H | 6.36246800 | 2.86920500  | 0.53670700  |
| H | 6.93567600 | 2.18747400  | -0.98527500 |

## R2

|                                              |             |             |                             |
|----------------------------------------------|-------------|-------------|-----------------------------|
| Zero-point correction=                       |             |             | 0.199048 (Hartree/Particle) |
| Thermal correction to Energy=                |             |             | 0.208863                    |
| Thermal correction to Enthalpy=              |             |             | 0.209807                    |
| Thermal correction to Gibbs Free Energy=     |             |             | 0.163397                    |
| Sum of electronic and zero-point Energies=   |             |             | -610.671882                 |
| Sum of electronic and thermal Energies=      |             |             | -610.662067                 |
| Sum of electronic and thermal Enthalpies=    |             |             | -610.661123                 |
| Sum of electronic and thermal Free Energies= |             |             | -610.707533                 |
| C                                            | 1.13913400  | -0.11965800 | 0.00000100                  |
| C                                            | 2.17857400  | 0.85423400  | -0.00003400                 |
| C                                            | 3.52014100  | 0.45731100  | -0.00002600                 |
| C                                            | 3.82495400  | -0.89518500 | 0.00004000                  |
| C                                            | 2.79813900  | -1.84855200 | 0.00002800                  |
| C                                            | 1.45588900  | -1.48239400 | 0.00003500                  |
| C                                            | 0.21783600  | 1.94782800  | -0.00006000                 |
| C                                            | 1.56163000  | 2.14363700  | 0.00000300                  |
| H                                            | 4.30655000  | 1.20787800  | 0.00001400                  |
| H                                            | 4.86153000  | -1.21997700 | 0.00012200                  |
| H                                            | 3.04708400  | -2.90593900 | -0.00001600                 |
| H                                            | 0.71256100  | -2.26740600 | 0.00001000                  |
| H                                            | -0.59743000 | 2.65228000  | -0.00008900                 |
| H                                            | 2.06244500  | 3.10201000  | 0.00002600                  |
| N                                            | -0.07682900 | 0.58269200  | -0.00002400                 |
| C                                            | -1.41151200 | 0.12447600  | -0.00003600                 |
| C                                            | -1.76154000 | -1.23123000 | -0.00004700                 |
| N                                            | -2.33053500 | 1.09887500  | 0.00007500                  |
| C                                            | -3.10873700 | -1.56366700 | -0.00002000                 |
| H                                            | -1.02300500 | -2.01733600 | -0.00018300                 |
| C                                            | -3.62026800 | 0.75412200  | 0.00008700                  |
| C                                            | -4.07106200 | -0.55933400 | 0.00000300                  |

|   |             |             |             |
|---|-------------|-------------|-------------|
| H | -3.39792000 | -2.61037900 | -0.00003600 |
| H | -4.32731600 | 1.58248500  | 0.00005600  |
| H | -5.13200900 | -0.78411000 | -0.00011200 |

### Cat

|                                              |             |             |                             |
|----------------------------------------------|-------------|-------------|-----------------------------|
| Zero-point correction=                       |             |             | 0.428186 (Hartree/Particle) |
| Thermal correction to Energy=                |             |             | 0.454374                    |
| Thermal correction to Enthalpy=              |             |             | 0.455318                    |
| Thermal correction to Gibbs Free Energy=     |             |             | 0.375083                    |
| Sum of electronic and zero-point Energies=   |             |             | -1640.234676                |
| Sum of electronic and thermal Energies=      |             |             | -1640.208488                |
| Sum of electronic and thermal Enthalpies=    |             |             | -1640.207544                |
| Sum of electronic and thermal Free Energies= |             |             | -1640.287779                |
| C                                            | 5.25871400  | -0.70894500 | -0.35642000                 |
| C                                            | 4.07248800  | -1.33974700 | -0.65772600                 |
| C                                            | 2.84438700  | -0.72397700 | -0.33266600                 |
| C                                            | 2.84984200  | 0.55770800  | 0.30940200                  |
| C                                            | 4.08210900  | 1.17935200  | 0.60531900                  |
| C                                            | 5.26368800  | 0.55322800  | 0.27755500                  |
| H                                            | 6.20268400  | -1.18516100 | -0.60515500                 |
| H                                            | 4.04829000  | -2.31111900 | -1.14346400                 |
| H                                            | 4.06511500  | 2.15130000  | 1.09023000                  |
| H                                            | 6.21124400  | 1.03273800  | 0.50520700                  |
| C                                            | 0.57374300  | 0.56209700  | 0.29913800                  |
| C                                            | 0.56681100  | -0.72269000 | -0.30699500                 |
| N                                            | 1.68483800  | 1.19377400  | 0.62711400                  |
| N                                            | 1.67576800  | -1.36712300 | -0.62049100                 |
| P                                            | -1.07191400 | 1.32907400  | 0.50899500                  |
| P                                            | -1.09344500 | -1.43886600 | -0.59547600                 |
| C                                            | -1.15935300 | 1.71198700  | 2.29258400                  |
| H                                            | -0.25873000 | 2.24352100  | 2.61353500                  |
| H                                            | -2.03658800 | 2.32799500  | 2.50677300                  |
| H                                            | -1.24053500 | 0.78298000  | 2.86214400                  |
| C                                            | -0.90452000 | -2.33274000 | -2.17413300                 |
| H                                            | 0.01849500  | -2.91910900 | -2.16777700                 |
| H                                            | -1.75485200 | -2.99732700 | -2.34566000                 |
| H                                            | -0.85498800 | -1.61154200 | -2.99341700                 |
| C                                            | -1.28482900 | -2.78410900 | 0.71330300                  |
| C                                            | -1.14164800 | -2.12209800 | 2.08203900                  |
| C                                            | -2.69390500 | -3.35633700 | 0.56368900                  |
| C                                            | -0.24536500 | -3.88765700 | 0.54170600                  |
| H                                            | -0.15148700 | -1.67344900 | 2.22449600                  |
| H                                            | -1.89583100 | -1.33915400 | 2.22673500                  |
| H                                            | -1.28037600 | -2.86941400 | 2.87163100                  |

|    |             |             |             |
|----|-------------|-------------|-------------|
| H  | -2.84967300 | -3.82204100 | -0.41531600 |
| H  | -2.86161100 | -4.12871100 | 1.32307800  |
| H  | -3.45965100 | -2.58311900 | 0.70026900  |
| H  | -0.36217200 | -4.62185800 | 1.34810800  |
| H  | -0.36723700 | -4.42236900 | -0.40555900 |
| H  | 0.77867200  | -3.50403300 | 0.58675500  |
| C  | -1.00911400 | 2.99204400  | -0.36170300 |
| C  | -0.25561500 | 4.04877100  | 0.43828600  |
| C  | -0.35731300 | 2.79551800  | -1.72956200 |
| C  | -2.47598800 | 3.38945600  | -0.54707100 |
| H  | -0.74017700 | 4.26810500  | 1.39456500  |
| H  | 0.77695000  | 3.74473400  | 0.63700600  |
| H  | -0.22636500 | 4.98264700  | -0.13622500 |
| H  | -0.84972700 | 1.99729600  | -2.29999000 |
| H  | -0.43985600 | 3.72152200  | -2.30976100 |
| H  | 0.70613300  | 2.54861400  | -1.64654100 |
| H  | -2.54701100 | 4.34042000  | -1.08747300 |
| H  | -3.01105200 | 2.63098800  | -1.13677200 |
| H  | -2.99688700 | 3.51170400  | 0.40936700  |
| Co | -2.50264500 | 0.13677800  | -0.49246000 |

## PR

|                                              |             |            |                             |
|----------------------------------------------|-------------|------------|-----------------------------|
| Zero-point correction=                       |             |            | 0.543300 (Hartree/Particle) |
| Thermal correction to Energy=                |             |            | 0.575050                    |
| Thermal correction to Enthalpy=              |             |            | 0.575994                    |
| Thermal correction to Gibbs Free Energy=     |             |            | 0.478410                    |
| Sum of electronic and zero-point Energies=   |             |            | -1949.057925                |
| Sum of electronic and thermal Energies=      |             |            | -1949.026176                |
| Sum of electronic and thermal Enthalpies=    |             |            | -1949.025231                |
| Sum of electronic and thermal Free Energies= |             |            | -1949.122815                |
| C                                            | -2.15178200 | 4.81113000 | 1.46385700                  |
| C                                            | -1.73757400 | 3.74175100 | 0.67543500                  |
| C                                            | -0.56589500 | 3.02825100 | 0.98989700                  |
| C                                            | 0.17127800  | 3.44540700 | 2.11459300                  |
| C                                            | -0.24550700 | 4.50912900 | 2.90261200                  |
| C                                            | -1.41415300 | 5.19812900 | 2.58156100                  |
| H                                            | -3.05595300 | 5.35218200 | 1.19724300                  |
| H                                            | -2.31827700 | 3.48442600 | -0.20426800                 |
| H                                            | 1.08556800  | 2.91045400 | 2.36342000                  |
| H                                            | 0.34365200  | 4.80433500 | 3.76662700                  |
| H                                            | -1.74283000 | 6.03529500 | 3.19102300                  |
| C                                            | -0.04362700 | 1.89220900 | 0.24043800                  |
| C                                            | -0.61721600 | 1.13303800 | -0.70982600                 |
| C                                            | -2.02457200 | 1.22938700 | -1.22650400                 |

|   |             |             |             |
|---|-------------|-------------|-------------|
| H | -2.74312400 | 1.27558200  | -0.38948900 |
| H | -2.21069700 | 2.10339000  | -1.86076200 |
| N | -2.18488000 | 0.00015800  | -2.03221300 |
| C | -1.16709700 | -0.97466300 | -1.61780900 |
| H | -1.00021200 | -1.70718600 | -2.40977100 |
| H | -1.45650500 | -1.50654700 | -0.69422000 |
| C | 0.03479400  | -0.07527600 | -1.34888000 |
| C | 1.12550000  | -0.77303500 | -0.54318700 |
| H | 0.43653100  | 0.22333100  | -2.32989400 |
| H | 1.18749300  | -1.82399200 | -0.86033400 |
| H | 0.83012800  | -0.81359000 | 0.51185300  |
| S | -3.74305700 | -0.55374500 | -2.27446000 |
| O | -3.62232700 | -1.71875700 | -3.14749800 |
| O | -4.52731500 | 0.61675500  | -2.66142500 |
| C | -4.32653200 | -1.11314000 | -0.69409400 |
| C | -4.03564000 | -2.41587900 | -0.28090700 |
| C | -5.00138400 | -0.23086100 | 0.14953200  |
| C | -4.43193600 | -2.83061900 | 0.98273000  |
| H | -3.52135100 | -3.09601200 | -0.95393600 |
| C | -5.39306800 | -0.66589200 | 1.41156400  |
| H | -5.23341100 | 0.77489800  | -0.18887800 |
| C | -5.11550400 | -1.96532400 | 1.84868000  |
| H | -4.21389700 | -3.84625100 | 1.30496400  |
| H | -5.92721900 | 0.01435600  | 2.07058300  |
| C | -5.54790700 | -2.43243500 | 3.20191300  |
| H | -5.95428300 | -1.61425200 | 3.80107200  |
| H | -4.71666600 | -2.88062900 | 3.75525600  |
| H | -6.32175800 | -3.20434500 | 3.12559900  |
| C | 4.73072900  | 0.02484300  | -0.47562200 |
| C | 4.26731000  | 1.10729300  | -1.26591000 |
| C | 5.18757800  | 2.05417100  | -1.73664000 |
| C | 6.52754700  | 1.91524000  | -1.40300300 |
| C | 6.96229900  | 0.85230500  | -0.59547000 |
| C | 6.07256100  | -0.10404500 | -0.11708600 |
| C | 2.47537400  | -0.15411600 | -0.68007700 |
| C | 2.85146300  | 0.96255600  | -1.38019000 |
| H | 4.85040000  | 2.88855700  | -2.34652800 |
| H | 7.25075600  | 2.64176400  | -1.76305400 |
| H | 8.01356200  | 0.77361000  | -0.33274800 |
| H | 6.41857100  | -0.91296700 | 0.51912200  |
| H | 0.96874000  | 1.61105500  | 0.53059800  |
| H | 2.17597000  | 1.61489400  | -1.91810800 |
| N | 3.62014900  | -0.74452600 | -0.12908400 |
| C | 3.65947900  | -1.90489200 | 0.67577100  |

|   |            |             |             |
|---|------------|-------------|-------------|
| C | 4.64566200 | -2.87211000 | 0.45622700  |
| N | 2.73147100 | -2.00090800 | 1.63215300  |
| C | 4.67545400 | -3.97727300 | 1.29447800  |
| H | 5.35254000 | -2.76289300 | -0.35949200 |
| C | 2.76441800 | -3.08895400 | 2.41150900  |
| C | 3.71741600 | -4.09455900 | 2.29788100  |
| H | 5.42959800 | -4.74579400 | 1.15357100  |
| H | 1.99046800 | -3.14646100 | 3.17511500  |
| H | 3.70426400 | -4.94493400 | 2.97135300  |

**PS**

|                                              |             |             |                             |
|----------------------------------------------|-------------|-------------|-----------------------------|
| Zero-point correction=                       |             |             | 0.543301 (Hartree/Particle) |
| Thermal correction to Energy=                |             |             | 0.575050                    |
| Thermal correction to Enthalpy=              |             |             | 0.575994                    |
| Thermal correction to Gibbs Free Energy=     |             |             | 0.478412                    |
| Sum of electronic and zero-point Energies=   |             |             | -1949.057925                |
| Sum of electronic and thermal Energies=      |             |             | -1949.026175                |
| Sum of electronic and thermal Enthalpies=    |             |             | -1949.025231                |
| Sum of electronic and thermal Free Energies= |             |             | -1949.122814                |
| C                                            | 2.15165600  | 4.81100900  | 1.46410700                  |
| C                                            | 1.73737800  | 3.74176500  | 0.67553800                  |
| C                                            | 0.56573600  | 3.02816400  | 0.98996100                  |
| C                                            | -0.17131600 | 3.44514000  | 2.11480500                  |
| C                                            | 0.24554200  | 4.50872100  | 2.90297800                  |
| C                                            | 1.41414100  | 5.19781300  | 2.58194700                  |
| H                                            | 3.05578400  | 5.35212000  | 1.19745700                  |
| H                                            | 2.31808400  | 3.48467600  | -0.20422700                 |
| H                                            | -1.08557500 | 2.91014200  | 2.36364900                  |
| H                                            | -0.34352900 | 4.80372700  | 3.76712400                  |
| H                                            | 1.74283500  | 6.03487500  | 3.19154300                  |
| C                                            | 0.04350000  | 1.89220500  | 0.24036400                  |
| C                                            | 0.61709300  | 1.13314600  | -0.70999700                 |
| C                                            | 2.02443900  | 1.22961100  | -1.22671700                 |
| H                                            | 2.74292300  | 1.27588300  | -0.38967100                 |
| H                                            | 2.21047200  | 2.10365900  | -1.86093600                 |
| N                                            | 2.18488000  | 0.00039600  | -2.03246300                 |
| C                                            | 1.16713200  | -0.97448200 | -1.61801600                 |
| H                                            | 1.00031900  | -1.70705300 | -2.40995000                 |
| H                                            | 1.45656800  | -1.50631200 | -0.69440300                 |
| C                                            | -0.03482300 | -0.07516900 | -1.34909500                 |
| C                                            | -1.12547600 | -0.77308000 | -0.54345600                 |
| H                                            | -0.43654200 | 0.22344500  | -2.33012500                 |
| H                                            | -1.18738400 | -1.82397300 | -0.86080900                 |
| H                                            | -0.83018500 | -0.81378000 | 0.51155700                  |



|   |             |             |             |
|---|-------------|-------------|-------------|
| S | 3.74315500  | -0.55355200 | -2.27444400 |
| O | 3.62247200  | -1.71857400 | -3.14746800 |
| O | 4.52750200  | 0.61689700  | -2.66137900 |
| C | 4.32650400  | -1.11300000 | -0.69404000 |
| C | 4.03546300  | -2.41574500 | -0.28091800 |
| C | 5.00142800  | -0.23085700 | 0.14964600  |
| C | 4.43167300  | -2.83057600 | 0.98271800  |
| H | 3.52109500  | -3.09577900 | -0.95397500 |
| C | 5.39297900  | -0.66595700 | 1.41169300  |
| H | 5.23361400  | 0.77487800  | -0.18872500 |
| C | 5.11527400  | -1.96537200 | 1.84874100  |
| H | 4.21347400  | -3.84617700 | 1.30493000  |
| H | 5.92716400  | 0.01420900  | 2.07076500  |
| C | 5.54764100  | -2.43256800 | 3.20193200  |
| H | 5.95355300  | -1.61434400 | 3.80135500  |
| H | 4.71652100  | -2.88129200 | 3.75504200  |
| H | 6.32184800  | -3.20412100 | 3.12557800  |
| C | -4.73068800 | 0.02491000  | -0.47549000 |
| C | -4.26731800 | 1.10725400  | -1.26595900 |
| C | -5.18759100 | 2.05413400  | -1.73667200 |
| C | -6.52753400 | 1.91528600  | -1.40289200 |
| C | -6.96224900 | 0.85244100  | -0.59521600 |
| C | -6.07250000 | -0.10388600 | -0.11682600 |
| C | -2.47536800 | -0.15418900 | -0.68024600 |
| C | -2.85149800 | 0.96243000  | -1.38041200 |
| H | -4.85044600 | 2.88844200  | -2.34668600 |
| H | -7.25075300 | 2.64180300  | -1.76294300 |
| H | -8.01349100 | 0.77381700  | -0.33239300 |
| H | -6.41847300 | -0.91272900 | 0.51950400  |
| H | -0.96884400 | 1.61092400  | 0.53050700  |
| H | -2.17607400 | 1.61461500  | -1.91859600 |
| N | -3.62008800 | -0.74442600 | -0.12892200 |
| C | -3.65940200 | -1.90488800 | 0.67578400  |
| C | -4.64560800 | -2.87208700 | 0.45623200  |
| N | -2.73128300 | -2.00104100 | 1.63205000  |
| C | -4.67528300 | -3.97736400 | 1.29433400  |
| H | -5.35262800 | -2.76278200 | -0.35935700 |
| C | -2.76411100 | -3.08920700 | 2.41123500  |
| C | -3.71711200 | -4.09480300 | 2.29759400  |
| H | -5.42946000 | -4.74584800 | 1.15342000  |
| H | -1.99004900 | -3.14678500 | 3.17472200  |
| H | -3.70385500 | -4.94530200 | 2.97091500  |

**M1R**

|                                              |             |             |                             |
|----------------------------------------------|-------------|-------------|-----------------------------|
| Zero-point correction=                       |             |             | 0.770958 (Hartree/Particle) |
| Thermal correction to Energy=                |             |             | 0.817956                    |
| Thermal correction to Enthalpy=              |             |             | 0.818901                    |
| Thermal correction to Gibbs Free Energy=     |             |             | 0.694442                    |
| Sum of electronic and zero-point Energies=   |             |             | -2978.619038                |
| Sum of electronic and thermal Energies=      |             |             | -2978.572040                |
| Sum of electronic and thermal Enthalpies=    |             |             | -2978.571096                |
| Sum of electronic and thermal Free Energies= |             |             | -2978.695554                |
| C                                            | 6.15971900  | -4.35130400 | 0.56225700                  |
| C                                            | 4.82688000  | -4.11457800 | 0.80233200                  |
| C                                            | 4.25839100  | -2.87581200 | 0.42920500                  |
| C                                            | 5.07672600  | -1.88451300 | -0.20536500                 |
| C                                            | 6.44380100  | -2.15814500 | -0.43672600                 |
| C                                            | 6.96975600  | -3.37057100 | -0.05765500                 |
| H                                            | 6.60129800  | -5.30048000 | 0.85087700                  |
| H                                            | 4.18829500  | -4.85259200 | 1.27903200                  |
| H                                            | 7.04845600  | -1.39582100 | -0.91948400                 |
| H                                            | 8.01923200  | -3.58458300 | -0.23654400                 |
| C                                            | 3.26586000  | -0.50435400 | -0.37591300                 |
| C                                            | 2.47087100  | -1.46516700 | 0.30722800                  |
| N                                            | 4.55254800  | -0.69473900 | -0.60401700                 |
| N                                            | 2.94732500  | -2.63323700 | 0.69379400                  |
| P                                            | 2.40481700  | 1.00484000  | -0.96953800                 |
| P                                            | 0.73365400  | -1.00573200 | 0.70345900                  |
| C                                            | 3.27206700  | 2.32103800  | -0.04247000                 |
| H                                            | 4.34437800  | 2.10932100  | -0.00629200                 |
| H                                            | 3.11911400  | 3.28563400  | -0.53133400                 |
| H                                            | 2.88463300  | 2.39266100  | 0.97534200                  |
| C                                            | -0.10691600 | -2.61592100 | 0.67248900                  |
| H                                            | 0.49083900  | -3.32536800 | 1.25050000                  |
| H                                            | -1.10850300 | -2.53789700 | 1.10204000                  |
| H                                            | -0.18297600 | -2.99742600 | -0.34686300                 |
| C                                            | 0.77141000  | -0.54574400 | 2.53982900                  |
| C                                            | 1.67571400  | 0.66643600  | 2.72874100                  |
| C                                            | -0.64456800 | -0.21785900 | 3.00630300                  |
| C                                            | 1.30974500  | -1.72337800 | 3.35659100                  |
| H                                            | 2.70492600  | 0.47117000  | 2.40398300                  |
| H                                            | 1.29922000  | 1.53886000  | 2.18540000                  |
| H                                            | 1.71078600  | 0.92805100  | 3.79227800                  |
| H                                            | -1.34595500 | -1.04241800 | 2.84588600                  |
| H                                            | -0.61801400 | -0.01373900 | 4.08290200                  |
| H                                            | -1.04158900 | 0.67373400  | 2.51349000                  |
| H                                            | 1.37156400  | -1.40549900 | 4.40355200                  |
| H                                            | 0.64815400  | -2.59306400 | 3.31993200                  |

|    |             |             |             |
|----|-------------|-------------|-------------|
| H  | 2.31003400  | -2.03648800 | 3.04575900  |
| C  | 3.01888900  | 1.25641300  | -2.74783500 |
| C  | 4.39365600  | 1.92572600  | -2.78406800 |
| C  | 3.12256600  | -0.08352200 | -3.47675400 |
| C  | 1.99588200  | 2.17312800  | -3.42142400 |
| H  | 4.38083400  | 2.93893400  | -2.37350400 |
| H  | 5.14758400  | 1.34028900  | -2.24986300 |
| H  | 4.71185900  | 2.00255400  | -3.83078400 |
| H  | 2.22783500  | -0.70252000 | -3.38730600 |
| H  | 3.28806300  | 0.10626600  | -4.54345300 |
| H  | 3.97207500  | -0.66717900 | -3.11123900 |
| H  | 2.30234600  | 2.37337000  | -4.45470400 |
| H  | 0.99210800  | 1.73425000  | -3.44680600 |
| H  | 1.92377700  | 3.14008900  | -2.90887900 |
| Co | 0.17282800  | 0.63430100  | -0.61063100 |
| C  | 0.24986900  | 5.19472600  | 2.51906900  |
| C  | -0.17183400 | 3.96236200  | 2.03409200  |
| C  | 0.10329600  | 3.59035100  | 0.70554400  |
| C  | 0.79424900  | 4.48975400  | -0.12089400 |
| C  | 1.19219900  | 5.73009600  | 0.36201400  |
| C  | 0.92891000  | 6.08289700  | 1.68536800  |
| H  | 0.03967000  | 5.46702800  | 3.54959600  |
| H  | -0.70861500 | 3.27011500  | 2.67951600  |
| H  | 1.00648200  | 4.20228800  | -1.14852000 |
| H  | 1.71528300  | 6.42131000  | -0.29306300 |
| H  | 1.25112100  | 7.04821500  | 2.06527400  |
| C  | -0.33024600 | 2.30422300  | 0.20882700  |
| C  | -1.30889900 | 1.45554800  | 0.16526100  |
| C  | -2.69571900 | 1.01485700  | 0.36392800  |
| H  | -3.35065500 | 1.48204900  | -0.39104300 |
| H  | -3.05749300 | 1.32136200  | 1.34985800  |
| N  | -2.72154300 | -0.45212700 | 0.29353100  |
| C  | -2.37888500 | -1.01700300 | -1.02814900 |
| H  | -2.06160200 | -2.05163800 | -0.88399300 |
| H  | -3.26935100 | -1.02963300 | -1.67989900 |
| C  | -1.32263300 | -0.20587000 | -1.71941700 |
| C  | -0.08518000 | -0.69334300 | -2.17389300 |
| H  | -1.71065900 | 0.67052200  | -2.24249600 |
| H  | 0.34252900  | -0.24447800 | -3.06534400 |
| H  | 0.20582500  | -1.72856900 | -2.00495900 |
| S  | -3.95554700 | -1.24588000 | 1.11837500  |
| O  | -3.54366200 | -2.64872300 | 1.14575400  |
| O  | -4.16768500 | -0.49293700 | 2.35175400  |
| C  | -5.41564800 | -1.13708200 | 0.11992800  |

|   |             |             |             |
|---|-------------|-------------|-------------|
| C | -5.65614400 | -2.13143200 | -0.82908900 |
| C | -6.26910800 | -0.03909000 | 0.24226300  |
| C | -6.76731100 | -2.02488000 | -1.65575000 |
| H | -4.98708800 | -2.98356100 | -0.90236200 |
| C | -7.37677000 | 0.04741300  | -0.59128400 |
| H | -6.07443000 | 0.72427300  | 0.99043600  |
| C | -7.64387200 | -0.93831300 | -1.55162900 |
| H | -6.96097600 | -2.79902100 | -2.39403300 |
| H | -8.05219300 | 0.89430400  | -0.49649200 |
| C | -8.85532500 | -0.84403900 | -2.42253200 |
| H | -9.09050300 | 0.19289300  | -2.67719300 |
| H | -8.73273000 | -1.40977100 | -3.34958300 |
| H | -9.73560500 | -1.25073900 | -1.91115400 |

### MIS

|                                              |            |             |                             |
|----------------------------------------------|------------|-------------|-----------------------------|
| Zero-point correction=                       |            |             | 0.771627 (Hartree/Particle) |
| Thermal correction to Energy=                |            |             | 0.818505                    |
| Thermal correction to Enthalpy=              |            |             | 0.819449                    |
| Thermal correction to Gibbs Free Energy=     |            |             | 0.694905                    |
| Sum of electronic and zero-point Energies=   |            |             | -2978.621725                |
| Sum of electronic and thermal Energies=      |            |             | -2978.574847                |
| Sum of electronic and thermal Enthalpies=    |            |             | -2978.573903                |
| Sum of electronic and thermal Free Energies= |            |             | -2978.698447                |
| C                                            | 7.84983200 | -1.70413300 | -0.82512700                 |
| C                                            | 6.65439700 | -2.16318900 | -0.32435400                 |
| C                                            | 5.50450400 | -1.34470800 | -0.39848200                 |
| C                                            | 5.59804900 | -0.04917900 | -1.00674100                 |
| C                                            | 6.84230600 | 0.39490600  | -1.50812600                 |
| C                                            | 7.94412800 | -0.42195200 | -1.41679900                 |
| H                                            | 8.73579500 | -2.32914100 | -0.76877100                 |
| H                                            | 6.56245700 | -3.14273600 | 0.13551500                  |
| H                                            | 6.89400400 | 1.38038000  | -1.96161300                 |
| H                                            | 8.90127500 | -0.08352400 | -1.80172400                 |
| C                                            | 3.37071900 | 0.28069600  | -0.63791000                 |
| C                                            | 3.28926700 | -0.98650300 | -0.00268800                 |
| N                                            | 4.50729000 | 0.75489200  | -1.11438200                 |
| N                                            | 4.32809700 | -1.79229200 | 0.11424800                  |
| P                                            | 1.80959200 | 1.23970500  | -0.74393800                 |
| P                                            | 1.66224200 | -1.46257700 | 0.70341500                  |
| C                                            | 2.22350500 | 2.69291400  | 0.28614600                  |
| H                                            | 3.23648800 | 3.02993800  | 0.05021800                  |
| H                                            | 1.52223900 | 3.50825900  | 0.09497700                  |
| H                                            | 2.16856800 | 2.44310600  | 1.34742100                  |
| C                                            | 1.61213700 | -3.24495200 | 0.34712600                  |

|    |             |             |             |
|----|-------------|-------------|-------------|
| H  | 2.58126000  | -3.67201400 | 0.61793900  |
| H  | 0.82274300  | -3.73806100 | 0.91853400  |
| H  | 1.44851900  | -3.42277200 | -0.71830200 |
| C  | 1.86503800  | -1.34966300 | 2.57386600  |
| C  | 2.40453400  | 0.03355900  | 2.92340300  |
| C  | 0.50019200  | -1.56238600 | 3.22628000  |
| C  | 2.84022100  | -2.42979000 | 3.04786700  |
| H  | 3.40606000  | 0.20582900  | 2.51269200  |
| H  | 1.73785700  | 0.82402900  | 2.56408900  |
| H  | 2.47332400  | 0.13079100  | 4.01266800  |
| H  | 0.00818700  | -2.47947500 | 2.88079500  |
| H  | 0.63302600  | -1.64730400 | 4.31045600  |
| H  | -0.17202700 | -0.72111300 | 3.03534700  |
| H  | 3.03619700  | -2.26915500 | 4.11405200  |
| H  | 2.42505800  | -3.43536700 | 2.93886200  |
| H  | 3.79862900  | -2.39115800 | 2.52177500  |
| C  | 1.75314300  | 1.96388000  | -2.49353500 |
| C  | 2.68498800  | 3.16917900  | -2.63011600 |
| C  | 2.17164100  | 0.91293800  | -3.52000100 |
| C  | 0.31022700  | 2.41489600  | -2.72903900 |
| H  | 2.37960700  | 4.01009000  | -2.00176600 |
| H  | 3.72179700  | 2.91428600  | -2.39417500 |
| H  | 2.65276000  | 3.51265700  | -3.67089900 |
| H  | 1.59245700  | -0.00956300 | -3.45829200 |
| H  | 2.02481700  | 1.32556000  | -4.52467200 |
| H  | 3.23132700  | 0.65816100  | -3.42374300 |
| H  | 0.21905800  | 2.83777500  | -3.73603600 |
| H  | -0.40790700 | 1.59144200  | -2.64279900 |
| H  | 0.01237600  | 3.19618600  | -2.02036500 |
| Co | 0.11896500  | -0.14250500 | -0.09240600 |
| C  | -0.30717900 | 3.73793700  | 3.69295800  |
| C  | -0.36229900 | 2.48955900  | 3.08177800  |
| C  | -0.68242300 | 2.38409400  | 1.71844600  |
| C  | -0.95997800 | 3.55264300  | 0.99190500  |
| C  | -0.91790800 | 4.79459400  | 1.61491200  |
| C  | -0.58249600 | 4.89369100  | 2.96439200  |
| H  | -0.05328700 | 3.80547300  | 4.74727100  |
| H  | -0.15600600 | 1.58766600  | 3.65375800  |
| H  | -1.20957600 | 3.47572100  | -0.06390100 |
| H  | -1.14358400 | 5.68939400  | 1.04147100  |
| H  | -0.54017000 | 5.86588600  | 3.44684000  |
| C  | -0.73652000 | 1.09091000  | 1.06940900  |
| C  | -1.46735200 | 0.03592800  | 0.85883900  |
| C  | -2.78458100 | -0.57030700 | 1.07416300  |

|   |             |             |             |
|---|-------------|-------------|-------------|
| H | -3.55161000 | 0.20594400  | 0.89901100  |
| H | -2.88422100 | -0.89287300 | 2.11605000  |
| N | -2.98240200 | -1.72989400 | 0.19323000  |
| C | -2.35830500 | -1.58146100 | -1.12833900 |
| H | -2.75024700 | -2.38435300 | -1.76151100 |
| H | -2.61401700 | -0.61954700 | -1.60248500 |
| C | -0.87885300 | -1.76065700 | -0.99491200 |
| C | 0.05591000  | -1.19358500 | -1.86703700 |
| H | -0.62461900 | -2.67367700 | -0.46104800 |
| H | 0.98184000  | -1.71703000 | -2.09845700 |
| H | -0.29159500 | -0.51263900 | -2.64299800 |
| S | -4.53354000 | -2.38431300 | 0.24469900  |
| O | -4.51884400 | -3.52729000 | -0.66314800 |
| O | -4.83566600 | -2.53687500 | 1.66497400  |
| C | -5.62001500 | -1.15236100 | -0.42378100 |
| C | -5.84545400 | -1.10752400 | -1.80195200 |
| C | -6.18262200 | -0.19892300 | 0.42489800  |
| C | -6.64792300 | -0.10218700 | -2.32287700 |
| H | -5.41341200 | -1.86450800 | -2.45040900 |
| C | -6.98128600 | 0.80258300  | -0.11706000 |
| H | -6.01313500 | -0.25558600 | 1.49618800  |
| C | -7.22652900 | 0.86891100  | -1.49261400 |
| H | -6.83915900 | -0.07033100 | -3.39301000 |
| H | -7.42869800 | 1.54414800  | 0.54012700  |
| C | -8.09922600 | 1.93688600  | -2.06916500 |
| H | -8.39185500 | 2.67034000  | -1.31440200 |
| H | -7.59759700 | 2.46778900  | -2.88444700 |
| H | -9.01545400 | 1.51170100  | -2.49327500 |

## TS1R

|                                              |            |             |                             |
|----------------------------------------------|------------|-------------|-----------------------------|
| Zero-point correction=                       |            |             | 0.768989 (Hartree/Particle) |
| Thermal correction to Energy=                |            |             | 0.815872                    |
| Thermal correction to Enthalpy=              |            |             | 0.816816                    |
| Thermal correction to Gibbs Free Energy=     |            |             | 0.691354                    |
| Sum of electronic and zero-point Energies=   |            |             | -2978.604021                |
| Sum of electronic and thermal Energies=      |            |             | -2978.557138                |
| Sum of electronic and thermal Enthalpies=    |            |             | -2978.556194                |
| Sum of electronic and thermal Free Energies= |            |             | -2978.681656                |
| Imaginary frequency=-97.92 cm <sup>-1</sup>  |            |             |                             |
| C                                            | 7.16725300 | -3.38026500 | -0.25199000                 |
| C                                            | 5.80670300 | -3.51869600 | -0.10663100                 |
| C                                            | 4.97815400 | -2.37486400 | -0.15071400                 |
| C                                            | 5.56607500 | -1.08584700 | -0.36126900                 |
| C                                            | 6.96784100 | -0.97504500 | -0.50055700                 |

|   |             |             |             |
|---|-------------|-------------|-------------|
| C | 7.74932800  | -2.10541000 | -0.44609700 |
| H | 7.80712400  | -4.25666100 | -0.21563800 |
| H | 5.34112700  | -4.48740300 | 0.04947900  |
| H | 7.39518500  | 0.01160600  | -0.65409000 |
| H | 8.82663200  | -2.02384400 | -0.55416800 |
| C | 3.49023600  | -0.13595000 | -0.31070600 |
| C | 2.91150800  | -1.40932600 | -0.03746000 |
| N | 4.79295500  | 0.02960100  | -0.44357000 |
| N | 3.63709500  | -2.51070000 | 0.02905000  |
| P | 2.33594100  | 1.28037600  | -0.52069400 |
| P | 1.10790100  | -1.45370700 | 0.31975100  |
| C | 2.89462200  | 2.48627400  | 0.72756800  |
| H | 3.98593900  | 2.55065600  | 0.73930500  |
| H | 2.47796900  | 3.47073000  | 0.49394500  |
| H | 2.54484900  | 2.19203900  | 1.71912500  |
| C | 0.61059600  | -3.10144800 | -0.27518100 |
| H | 1.38424500  | -3.83093900 | -0.02117000 |
| H | -0.33317200 | -3.39930700 | 0.19084600  |
| H | 0.48120100  | -3.09476000 | -1.36011600 |
| C | 1.02729300  | -1.58884100 | 2.20592400  |
| C | 1.77419500  | -0.40392800 | 2.81334800  |
| C | -0.44210500 | -1.52360100 | 2.61822400  |
| C | 1.64570300  | -2.90315300 | 2.67613500  |
| H | 2.83917900  | -0.39669100 | 2.55301900  |
| H | 1.33595700  | 0.55024500  | 2.49630100  |
| H | 1.70350500  | -0.45130600 | 3.90585300  |
| H | -1.04506400 | -2.31005300 | 2.15272900  |
| H | -0.51571700 | -1.64936500 | 3.70466300  |
| H | -0.88918500 | -0.55742400 | 2.36039700  |
| H | 1.63250600  | -2.92441300 | 3.77226200  |
| H | 1.08094600  | -3.77210400 | 2.32558900  |
| H | 2.68507800  | -3.01752100 | 2.35424000  |
| C | 2.81540800  | 2.08250600  | -2.15981800 |
| C | 4.11668900  | 2.87588400  | -2.02840200 |
| C | 2.99266500  | 1.00256000  | -3.22626200 |
| C | 1.67990400  | 3.03930000  | -2.52619800 |
| H | 4.01484400  | 3.72547500  | -1.34714000 |
| H | 4.94596700  | 2.25087700  | -1.68533700 |
| H | 4.38122000  | 3.27698600  | -3.01410300 |
| H | 2.12988000  | 0.33518400  | -3.30829100 |
| H | 3.13481200  | 1.48018000  | -4.20214600 |
| H | 3.87796200  | 0.38936200  | -3.03064800 |
| H | 1.92687600  | 3.55912900  | -3.45924800 |
| H | 0.72648600  | 2.51970800  | -2.66957500 |

|    |             |             |             |
|----|-------------|-------------|-------------|
| H  | 1.53297500  | 3.80403400  | -1.75415600 |
| Co | 0.30633700  | 0.49326100  | -0.34760500 |
| C  | -0.74371900 | 5.73526500  | 0.76906800  |
| C  | -0.85196500 | 4.48999900  | 0.16006300  |
| C  | -0.54258600 | 3.32043500  | 0.87563500  |
| C  | -0.12436700 | 3.43374800  | 2.21294500  |
| C  | -0.03425900 | 4.68244900  | 2.81781200  |
| C  | -0.33724500 | 5.83761900  | 2.09884000  |
| H  | -0.98259400 | 6.63051200  | 0.20157100  |
| H  | -1.16852500 | 4.41273300  | -0.87744300 |
| H  | 0.12194900  | 2.53261500  | 2.77150000  |
| H  | 0.27920700  | 4.75253800  | 3.85586600  |
| H  | -0.25644200 | 6.81194500  | 2.57187300  |
| C  | -0.61724400 | 2.02671800  | 0.23319800  |
| C  | -1.50464900 | 1.04632500  | 0.06405500  |
| C  | -2.83004800 | 0.61079800  | 0.58850900  |
| H  | -3.65375700 | 1.12903100  | 0.06629500  |
| H  | -2.90875300 | 0.82104800  | 1.65819900  |
| N  | -2.82084000 | -0.83038200 | 0.35035900  |
| C  | -2.32198700 | -1.13535800 | -0.99673900 |
| H  | -1.76998600 | -2.07797600 | -0.98048200 |
| H  | -3.14039700 | -1.22985600 | -1.72841400 |
| C  | -1.44557800 | 0.03421000  | -1.39131700 |
| C  | -0.16542600 | -0.19681200 | -2.08593600 |
| H  | -2.01286300 | 0.81361000  | -1.91319800 |
| H  | 0.09291900  | 0.51499600  | -2.87005300 |
| H  | 0.05191100  | -1.22754500 | -2.36888700 |
| S  | -4.05825000 | -1.76605400 | 0.97112600  |
| O  | -3.67684200 | -3.14548900 | 0.68037400  |
| O  | -4.25642000 | -1.29173000 | 2.33700900  |
| C  | -5.49926800 | -1.36941700 | 0.02007900  |
| C  | -5.80200900 | -2.11737400 | -1.12004000 |
| C  | -6.27223600 | -0.26471300 | 0.37898400  |
| C  | -6.89558100 | -1.75486100 | -1.89487800 |
| H  | -5.19645300 | -2.98108300 | -1.37817900 |
| C  | -7.36190500 | 0.08365600  | -0.41145500 |
| H  | -6.03266000 | 0.30135100  | 1.27481800  |
| C  | -7.69098800 | -0.65127300 | -1.55653000 |
| H  | -7.14311300 | -2.33996200 | -2.77747900 |
| H  | -7.97338100 | 0.93848200  | -0.13325600 |
| C  | -8.87013200 | -0.28290900 | -2.39885100 |
| H  | -9.33320900 | 0.64691800  | -2.06181800 |
| H  | -8.58836600 | -0.16231100 | -3.44986000 |
| H  | -9.63517700 | -1.06649300 | -2.37158200 |



**TS1S**

|                                              |            |             |                             |
|----------------------------------------------|------------|-------------|-----------------------------|
| Zero-point correction=                       |            |             | 0.770552 (Hartree/Particle) |
| Thermal correction to Energy=                |            |             | 0.816957                    |
| Thermal correction to Enthalpy=              |            |             | 0.817901                    |
| Thermal correction to Gibbs Free Energy=     |            |             | 0.694122                    |
| Sum of electronic and zero-point Energies=   |            |             | -2978.601310                |
| Sum of electronic and thermal Energies=      |            |             | -2978.554905                |
| Sum of electronic and thermal Enthalpies=    |            |             | -2978.553961                |
| Sum of electronic and thermal Free Energies= |            |             | -2978.677740                |
| Imaginary frequency=-179.49 cm <sup>-1</sup> |            |             |                             |
| C                                            | 8.01197400 | 0.60063300  | -0.89192700                 |
| C                                            | 7.06315000 | -0.38370500 | -0.74447500                 |
| C                                            | 5.70462600 | -0.02928800 | -0.58469600                 |
| C                                            | 5.33249600 | 1.35588400  | -0.58140800                 |
| C                                            | 6.33118200 | 2.34322200  | -0.73698200                 |
| C                                            | 7.64484200 | 1.96695300  | -0.88865100                 |
| H                                            | 9.05716800 | 0.33113400  | -1.01128200                 |
| H                                            | 7.32429400 | -1.43764200 | -0.74276700                 |
| H                                            | 6.03018300 | 3.38646900  | -0.73240800                 |
| H                                            | 8.41392200 | 2.72415100  | -1.00690600                 |
| C                                            | 3.15099500 | 0.76237500  | -0.30295000                 |
| C                                            | 3.52484400 | -0.60690300 | -0.27700100                 |
| N                                            | 4.03367800 | 1.73429700  | -0.43423300                 |
| N                                            | 4.77413800 | -1.00744100 | -0.41948100                 |
| P                                            | 1.35528300 | 1.10191400  | -0.15087700                 |
| P                                            | 2.17589600 | -1.80413600 | 0.03631400                  |
| C                                            | 1.28220200 | 2.21331800  | 1.29007600                  |
| H                                            | 2.04731400 | 2.98921500  | 1.20009100                  |
| H                                            | 0.29844100 | 2.68472200  | 1.36211800                  |
| H                                            | 1.45903100 | 1.64819600  | 2.20817100                  |
| C                                            | 2.65037400 | -3.24986100 | -0.95831600                 |
| H                                            | 3.65827500 | -3.56674000 | -0.68015300                 |
| H                                            | 1.95326200 | -4.07452400 | -0.78705100                 |
| H                                            | 2.65768700 | -3.00167000 | -2.02066000                 |
| C                                            | 2.41058700 | -2.36800800 | 1.82318400                  |
| C                                            | 2.45115800 | -1.13468300 | 2.72012800                  |
| C                                            | 1.21711900 | -3.25171600 | 2.18486900                  |
| C                                            | 3.70891600 | -3.16201400 | 1.96709000                  |
| H                                            | 3.33253300 | -0.51369800 | 2.52281300                  |
| H                                            | 1.55648700 | -0.51656500 | 2.59187600                  |
| H                                            | 2.49436600 | -1.44737200 | 3.76932400                  |
| H                                            | 1.12230700 | -4.10824100 | 1.50733800                  |
| H                                            | 1.35254300 | -3.64784800 | 3.19754300                  |

|    |             |             |             |
|----|-------------|-------------|-------------|
| H  | 0.27651500  | -2.69120000 | 2.16576000  |
| H  | 3.87622600  | -3.36501800 | 3.03125900  |
| H  | 3.66173800  | -4.12722900 | 1.45544400  |
| H  | 4.57975600  | -2.61489300 | 1.59244600  |
| C  | 0.89202900  | 2.19340900  | -1.61924300 |
| C  | 1.35697100  | 3.63232100  | -1.39972400 |
| C  | 1.54573300  | 1.63198800  | -2.88027300 |
| C  | -0.63393600 | 2.15447000  | -1.72735900 |
| H  | 0.84487100  | 4.10991600  | -0.55933400 |
| H  | 2.43612900  | 3.69073200  | -1.22988500 |
| H  | 1.12679300  | 4.21553500  | -2.29922500 |
| H  | 1.37226200  | 0.55846800  | -3.00217700 |
| H  | 1.13351500  | 2.13876300  | -3.76015500 |
| H  | 2.62698100  | 1.80334500  | -2.87925100 |
| H  | -0.96293400 | 2.81496100  | -2.53823800 |
| H  | -1.00464300 | 1.14565700  | -1.94435100 |
| H  | -1.11562500 | 2.50061800  | -0.80392200 |
| Co | 0.28314900  | -0.78347900 | -0.16573800 |
| C  | -1.34411500 | 1.33256900  | 4.49906600  |
| C  | -0.93595800 | 0.42081000  | 3.53090400  |
| C  | -1.38567700 | 0.54559700  | 2.20792200  |
| C  | -2.25601600 | 1.60077400  | 1.88198300  |
| C  | -2.64742700 | 2.51608000  | 2.85272300  |
| C  | -2.18955000 | 2.38896200  | 4.16365500  |
| H  | -0.99359600 | 1.22008600  | 5.52144500  |
| H  | -0.27541700 | -0.40059300 | 3.79734500  |
| H  | -2.61278100 | 1.69603300  | 0.85761200  |
| H  | -3.31556500 | 3.33059500  | 2.58291100  |
| H  | -2.49629900 | 3.10461700  | 4.92089400  |
| C  | -0.95477900 | -0.36207100 | 1.16151100  |
| C  | -1.54872100 | -1.30378500 | 0.45084100  |
| C  | -2.87188200 | -1.96993700 | 0.58581000  |
| H  | -3.55462700 | -1.30355200 | 1.12904300  |
| H  | -2.76862700 | -2.88369100 | 1.18558700  |
| N  | -3.37741500 | -2.31020400 | -0.75415300 |
| C  | -2.39412500 | -1.94033700 | -1.77497900 |
| H  | -2.52413200 | -2.57740300 | -2.65271600 |
| H  | -2.48846900 | -0.88900100 | -2.09469400 |
| C  | -1.02084600 | -2.15153600 | -1.19419500 |
| C  | 0.07154200  | -1.56017900 | -1.95221200 |
| H  | -0.85926800 | -3.17822600 | -0.85573500 |
| H  | 0.80059000  | -2.24527500 | -2.37255300 |
| H  | -0.22033400 | -0.77193700 | -2.65044100 |
| S  | -4.97293700 | -1.88410100 | -1.07698200 |

|   |             |             |             |
|---|-------------|-------------|-------------|
| O | -5.17978900 | -2.22129800 | -2.48182600 |
| O | -5.76832300 | -2.48209100 | -0.01014500 |
| C | -5.05613500 | -0.12099200 | -0.89739200 |
| C | -4.62534400 | 0.70286000  | -1.94255300 |
| C | -5.49004300 | 0.42649900  | 0.31014000  |
| C | -4.61012800 | 2.07892900  | -1.75720800 |
| H | -4.32846200 | 0.27048300  | -2.89410400 |
| C | -5.48521900 | 1.80793500  | 0.46923100  |
| H | -5.84295300 | -0.22524300 | 1.10387700  |
| C | -5.03224600 | 2.65358300  | -0.54926700 |
| H | -4.27550000 | 2.72398400  | -2.56675900 |
| H | -5.83557100 | 2.23851100  | 1.40422600  |
| C | -4.97569300 | 4.13447500  | -0.35328300 |
| H | -5.50903900 | 4.44530200  | 0.54829100  |
| H | -3.93767400 | 4.47687100  | -0.25894500 |
| H | -5.40268900 | 4.67083500  | -1.20601900 |

## M2R

|                                              |            |             |                             |
|----------------------------------------------|------------|-------------|-----------------------------|
| Zero-point correction=                       |            |             | 0.771816 (Hartree/Particle) |
| Thermal correction to Energy=                |            |             | 0.818648                    |
| Thermal correction to Enthalpy=              |            |             | 0.819592                    |
| Thermal correction to Gibbs Free Energy=     |            |             | 0.693436                    |
| Sum of electronic and zero-point Energies=   |            |             | -2978.607430                |
| Sum of electronic and thermal Energies=      |            |             | -2978.560598                |
| Sum of electronic and thermal Enthalpies=    |            |             | -2978.559654                |
| Sum of electronic and thermal Free Energies= |            |             | -2978.685810                |
| C                                            | 7.71762300 | -2.50403500 | -0.91764300                 |
| C                                            | 6.50367500 | -2.80246400 | -0.34577400                 |
| C                                            | 5.45145800 | -1.86075900 | -0.40612200                 |
| C                                            | 5.66498200 | -0.60709100 | -1.06736100                 |
| C                                            | 6.92462900 | -0.32899000 | -1.64446800                 |
| C                                            | 7.92905800 | -1.26442600 | -1.56728000                 |
| H                                            | 8.52864000 | -3.22474800 | -0.87173500                 |
| H                                            | 6.32302200 | -3.74690100 | 0.15915300                  |
| H                                            | 7.06612500 | 0.62657400  | -2.14114400                 |
| H                                            | 8.89834400 | -1.05581100 | -2.01019800                 |
| C                                            | 3.51078100 | -0.00262200 | -0.60825900                 |
| C                                            | 3.30838200 | -1.23391000 | 0.08341200                  |
| N                                            | 4.66871400 | 0.31149900  | -1.15710000                 |
| N                                            | 4.25752700 | -2.14946600 | 0.17447200                  |
| P                                            | 2.08435700 | 1.16226700  | -0.75708400                 |
| P                                            | 1.67990900 | -1.49722400 | 0.88689700                  |
| C                                            | 2.61964200 | 2.65108300  | 0.14482200                  |
| H                                            | 3.64493500 | 2.91465600  | -0.12966800                 |

|    |             |             |             |
|----|-------------|-------------|-------------|
| H  | 1.94943700  | 3.48055400  | -0.10010200 |
| H  | 2.57788500  | 2.48111900  | 1.22282100  |
| C  | 1.34799800  | -3.26210600 | 0.60851200  |
| H  | 2.23136800  | -3.85677300 | 0.85672300  |
| H  | 0.50458600  | -3.58931100 | 1.22170500  |
| H  | 1.09801200  | -3.43123400 | -0.44204900 |
| C  | 1.99100800  | -1.28951100 | 2.72228700  |
| C  | 2.46766700  | 0.15151600  | 2.89931100  |
| C  | 0.63810600  | -1.46390000 | 3.41515900  |
| C  | 3.00528700  | -2.27935200 | 3.27786100  |
| H  | 3.45314000  | 0.32089100  | 2.44945700  |
| H  | 1.76098600  | 0.85877400  | 2.43709100  |
| H  | 2.53588200  | 0.40453600  | 3.96330900  |
| H  | 0.22896000  | -2.47118000 | 3.28615300  |
| H  | 0.75412800  | -1.29192700 | 4.49120500  |
| H  | -0.10463900 | -0.74444500 | 3.04467500  |
| H  | 3.15539500  | -2.08512100 | 4.34668100  |
| H  | 2.66059300  | -3.31364600 | 3.17864600  |
| H  | 3.97780700  | -2.19552700 | 2.78434500  |
| C  | 2.00769800  | 1.69668300  | -2.55929700 |
| C  | 3.16787000  | 2.64242800  | -2.88602300 |
| C  | 2.09290600  | 0.46480600  | -3.45996500 |
| C  | 0.69347200  | 2.45356300  | -2.75990400 |
| H  | 3.10414700  | 3.58254100  | -2.33057300 |
| H  | 4.14162700  | 2.18648900  | -2.69271700 |
| H  | 3.11436900  | 2.88967100  | -3.95266500 |
| H  | 1.34519000  | -0.29625900 | -3.21854200 |
| H  | 1.92983700  | 0.76945900  | -4.49954400 |
| H  | 3.08120600  | -0.00266900 | -3.40589500 |
| H  | 0.65502700  | 2.82834100  | -3.78898500 |
| H  | -0.18892900 | 1.82910100  | -2.59423300 |
| H  | 0.62203100  | 3.32118100  | -2.09349200 |
| Co | 0.39941900  | 0.27063700  | 0.26382000  |
| C  | -1.00610200 | 5.33755200  | 0.83355300  |
| C  | -1.17119000 | 4.08260400  | 0.25706800  |
| C  | -0.84215000 | 2.91710400  | 0.97219800  |
| C  | -0.35760400 | 3.05232000  | 2.28579900  |
| C  | -0.20637700 | 4.30943500  | 2.86170000  |
| C  | -0.52081600 | 5.45700900  | 2.13558600  |
| H  | -1.26284800 | 6.22717000  | 0.26483900  |
| H  | -1.54864400 | 3.99110300  | -0.75910900 |
| H  | -0.11785500 | 2.15878400  | 2.86080400  |
| H  | 0.15619600  | 4.39250800  | 3.88282300  |
| H  | -0.39620500 | 6.43825000  | 2.58421600  |

|   |             |             |             |
|---|-------------|-------------|-------------|
| C | -0.92036200 | 1.61522300  | 0.32668900  |
| C | -1.96609500 | 0.77189600  | 0.20011500  |
| C | -3.24926800 | 0.68185000  | 0.97235100  |
| H | -4.09632000 | 1.06549600  | 0.37943800  |
| H | -3.22841300 | 1.21717700  | 1.92465600  |
| N | -3.36106000 | -0.78485100 | 1.19098200  |
| C | -2.41458700 | -1.53189400 | 0.31943700  |
| H | -1.59415100 | -1.93423800 | 0.93207800  |
| H | -2.91272700 | -2.37603400 | -0.16615700 |
| C | -1.89772800 | -0.47943200 | -0.65360900 |
| C | -0.50408400 | -0.63912100 | -1.19925800 |
| H | -2.64505700 | -0.37222300 | -1.46196800 |
| H | -0.37500000 | -0.10474200 | -2.14090000 |
| H | -0.16697300 | -1.67425400 | -1.31266700 |
| S | -4.89912600 | -1.41147600 | 1.38019200  |
| O | -4.71625600 | -2.83425400 | 1.65499100  |
| O | -5.57251400 | -0.52135400 | 2.32184700  |
| C | -5.70429300 | -1.25745400 | -0.19381000 |
| C | -5.55462900 | -2.26893600 | -1.14511900 |
| C | -6.41369000 | -0.09336000 | -0.49669600 |
| C | -6.11452800 | -2.10333200 | -2.40599300 |
| H | -5.02282900 | -3.18117500 | -0.88971100 |
| C | -6.97151300 | 0.05121500  | -1.76144600 |
| H | -6.54292300 | 0.67537500  | 0.25935000  |
| C | -6.82893200 | -0.94452500 | -2.73597600 |
| H | -6.00464900 | -2.89042500 | -3.14813200 |
| H | -7.53165000 | 0.95244700  | -1.99921500 |
| C | -7.45793800 | -0.78864500 | -4.08356500 |
| H | -7.47087100 | 0.25645500  | -4.40424700 |
| H | -6.93883000 | -1.37813100 | -4.84370500 |
| H | -8.49988800 | -1.12905000 | -4.06917400 |

## M2S

|                                              |             |             |                             |
|----------------------------------------------|-------------|-------------|-----------------------------|
| Zero-point correction=                       |             |             | 0.771287 (Hartree/Particle) |
| Thermal correction to Energy=                |             |             | 0.818216                    |
| Thermal correction to Enthalpy=              |             |             | 0.819160                    |
| Thermal correction to Gibbs Free Energy=     |             |             | 0.692901                    |
| Sum of electronic and zero-point Energies=   |             |             | -2978.621108                |
| Sum of electronic and thermal Energies=      |             |             | -2978.574180                |
| Sum of electronic and thermal Enthalpies=    |             |             | -2978.573236                |
| Sum of electronic and thermal Free Energies= |             |             | -2978.699495                |
| C                                            | -7.61455600 | -1.05845500 | -2.33599200                 |
| C                                            | -6.41834200 | -0.40204000 | -2.50230000                 |
| C                                            | -5.43662900 | -0.47272800 | -1.48821900                 |

|   |             |             |             |
|---|-------------|-------------|-------------|
| C | -5.69178600 | -1.24439900 | -0.30757700 |
| C | -6.93438900 | -1.90304300 | -0.16429100 |
| C | -7.87493500 | -1.80555800 | -1.16263400 |
| H | -8.37538100 | -1.00105500 | -3.10872000 |
| H | -6.20226800 | 0.18480900  | -3.39003700 |
| H | -7.11365600 | -2.47948100 | 0.73862400  |
| H | -8.83056100 | -2.31010700 | -1.05593800 |
| C | -3.60676400 | -0.72897500 | 0.47870200  |
| C | -3.39624700 | 0.11420100  | -0.65184300 |
| N | -4.74617300 | -1.37385200 | 0.66017400  |
| N | -4.27788900 | 0.22220900  | -1.62756000 |
| P | -2.17106600 | -0.97602900 | 1.59925000  |
| P | -1.87895700 | 1.15357700  | -0.71871500 |
| C | -2.72199900 | -0.35394900 | 3.22833800  |
| H | -3.74457000 | -0.67130700 | 3.44876500  |
| H | -2.05146300 | -0.73922800 | 4.00209500  |
| H | -2.67372800 | 0.73636100  | 3.25443700  |
| C | -1.53330400 | 1.28007400  | -2.49450100 |
| H | -2.35885400 | 1.79665500  | -2.99163500 |
| H | -0.60677000 | 1.83324300  | -2.65833500 |
| H | -1.44165800 | 0.28266100  | -2.92831000 |
| C | -2.46108600 | 2.87254100  | -0.20140400 |
| C | -2.56867600 | 2.88249200  | 1.31997500  |
| C | -1.42158500 | 3.88408400  | -0.68091400 |
| C | -3.82057800 | 3.20648700  | -0.81150100 |
| H | -3.28482500 | 2.13113600  | 1.67326400  |
| H | -1.59854500 | 2.70187300  | 1.79812200  |
| H | -2.92423100 | 3.86167200  | 1.66006600  |
| H | -1.41186100 | 3.97082900  | -1.77174500 |
| H | -1.67465800 | 4.87000100  | -0.27524300 |
| H | -0.40939200 | 3.63923500  | -0.34524900 |
| H | -4.05008600 | 4.25410500  | -0.58398500 |
| H | -3.83727300 | 3.09540300  | -1.89975400 |
| H | -4.62395700 | 2.59453000  | -0.39237100 |
| C | -2.03645000 | -2.84074700 | 1.85775900  |
| C | -3.15306200 | -3.37010200 | 2.75634500  |
| C | -2.08392400 | -3.54969500 | 0.50657200  |
| C | -0.68230400 | -3.08329900 | 2.52657400  |
| H | -3.10644800 | -2.94984900 | 3.76516800  |
| H | -4.14419900 | -3.16884800 | 2.34138700  |
| H | -3.04012800 | -4.45653500 | 2.85169100  |
| H | -1.29878100 | -3.20400500 | -0.17217100 |
| H | -1.93205600 | -4.62383400 | 0.66191600  |
| H | -3.05140200 | -3.42449700 | 0.00966800  |

|    |             |             |             |
|----|-------------|-------------|-------------|
| H  | -0.56893200 | -4.15243000 | 2.73944400  |
| H  | 0.15354300  | -2.78495600 | 1.88469700  |
| H  | -0.59153700 | -2.54981000 | 3.47947900  |
| Co | -0.45564100 | 0.27358200  | 0.61513200  |
| C  | 2.55023900  | 4.52847400  | 1.48882800  |
| C  | 2.20932600  | 3.52318400  | 0.58992200  |
| C  | 1.44378100  | 2.41766300  | 1.00258900  |
| C  | 1.03193400  | 2.36720700  | 2.34901300  |
| C  | 1.36914800  | 3.37363300  | 3.24616300  |
| C  | 2.13243100  | 4.45958500  | 2.81763800  |
| H  | 3.14231400  | 5.37457800  | 1.14998600  |
| H  | 2.51571200  | 3.59901400  | -0.45125100 |
| H  | 0.44784000  | 1.50856100  | 2.69082900  |
| H  | 1.04338600  | 3.31072800  | 4.28097400  |
| H  | 2.39953600  | 5.24815200  | 3.51540600  |
| C  | 1.03538900  | 1.34212500  | 0.09915200  |
| C  | 1.73643200  | 0.84143600  | -0.94073700 |
| C  | 3.14691400  | 1.08066000  | -1.39368700 |
| H  | 3.83918300  | 1.15129500  | -0.53765000 |
| H  | 3.27650900  | 1.99139300  | -1.98916600 |
| N  | 3.41015900  | -0.10157300 | -2.24822200 |
| C  | 2.44918100  | -1.16980100 | -1.91438200 |
| H  | 2.36921000  | -1.87405400 | -2.74414300 |
| H  | 2.74760700  | -1.72010500 | -1.00457300 |
| C  | 1.17873800  | -0.35767900 | -1.64226600 |
| C  | 0.13449500  | -0.98490600 | -0.74179600 |
| H  | 0.75357100  | -0.07834400 | -2.61619100 |
| H  | -0.67639000 | -1.50101300 | -1.26743900 |
| H  | 0.60178300  | -1.67376500 | -0.01697600 |
| S  | 5.00646000  | -0.53438900 | -2.49189000 |
| O  | 4.97929600  | -1.65733900 | -3.42547800 |
| O  | 5.71082900  | 0.70678200  | -2.80314900 |
| C  | 5.60721000  | -1.13132900 | -0.93275400 |
| C  | 5.45457900  | -2.48087100 | -0.60918900 |
| C  | 6.16235900  | -0.23614800 | -0.01627200 |
| C  | 5.86944100  | -2.93084300 | 0.63804500  |
| H  | 5.03533500  | -3.16891500 | -1.33756800 |
| C  | 6.56997400  | -0.70457300 | 1.22716600  |
| H  | 6.29324100  | 0.80761900  | -0.28723000 |
| C  | 6.43288400  | -2.05436100 | 1.57451600  |
| H  | 5.76233900  | -3.98328200 | 0.89054800  |
| H  | 7.00966100  | -0.01302500 | 1.94170400  |
| C  | 6.91051800  | -2.55453300 | 2.90007700  |
| H  | 6.87493400  | -1.77324100 | 3.66376100  |

|   |            |             |            |
|---|------------|-------------|------------|
| H | 6.32169100 | -3.40774600 | 3.24708700 |
| H | 7.95167400 | -2.89201500 | 2.83778400 |

## TS2R

|                                               |             |             |                             |
|-----------------------------------------------|-------------|-------------|-----------------------------|
| Zero-point correction=                        |             |             | 0.971204 (Hartree/Particle) |
| Thermal correction to Energy=                 |             |             | 1.028367                    |
| Thermal correction to Enthalpy=               |             |             | 1.029311                    |
| Thermal correction to Gibbs Free Energy=      |             |             | 0.885734                    |
| Sum of electronic and zero-point Energies=    |             |             | -3589.277197                |
| Sum of electronic and thermal Energies=       |             |             | -3589.220034                |
| Sum of electronic and thermal Enthalpies=     |             |             | -3589.219089                |
| Sum of electronic and thermal Free Energies=  |             |             | -3589.362666                |
| Imaginary frequency=-1300.45 cm <sup>-1</sup> |             |             |                             |
| C                                             | -3.74203100 | 5.45349800  | -0.80184300                 |
| C                                             | -3.55469000 | 4.36157800  | 0.01352400                  |
| C                                             | -2.27333100 | 3.77402200  | 0.11025000                  |
| C                                             | -1.18275000 | 4.33127900  | -0.62646500                 |
| C                                             | -1.40693200 | 5.44677100  | -1.46307400                 |
| C                                             | -2.66686400 | 5.99334900  | -1.54584000                 |
| H                                             | -4.72579000 | 5.90569400  | -0.88439700                 |
| H                                             | -4.36943900 | 3.92220100  | 0.58262700                  |
| H                                             | -0.56897600 | 5.84546300  | -2.02808800                 |
| H                                             | -2.84396400 | 6.85096800  | -2.18804600                 |
| C                                             | 0.21424200  | 2.72640700  | 0.21494800                  |
| C                                             | -0.89705500 | 2.11980200  | 0.89189800                  |
| N                                             | 0.06539500  | 3.79716400  | -0.53899400                 |
| N                                             | -2.10264000 | 2.65159600  | 0.85733500                  |
| P                                             | 1.83948100  | 1.88659000  | 0.39034800                  |
| P                                             | -0.67446700 | 0.45842800  | 1.68624900                  |
| C                                             | 2.33740800  | 2.45884100  | 2.05461700                  |
| H                                             | 2.25805200  | 3.54433200  | 2.14669200                  |
| H                                             | 3.36501000  | 2.15069600  | 2.26496000                  |
| H                                             | 1.69602800  | 2.00490800  | 2.80514700                  |
| C                                             | -2.20702200 | -0.41934600 | 1.21441400                  |
| H                                             | -3.02968100 | 0.29786600  | 1.17424000                  |
| H                                             | -2.43186100 | -1.17830300 | 1.96674800                  |
| H                                             | -2.10984800 | -0.91281200 | 0.25147400                  |
| C                                             | -1.11283200 | 0.71111200  | 3.56097000                  |
| C                                             | -0.25748000 | 1.77754800  | 4.24259000                  |
| C                                             | -0.98199100 | -0.63182200 | 4.28376400                  |
| C                                             | -2.57611900 | 1.16204200  | 3.67768100                  |
| H                                             | -0.24015300 | 2.71874100  | 3.68231500                  |
| H                                             | 0.77245200  | 1.46456100  | 4.43126900                  |
| H                                             | -0.69330400 | 1.99296800  | 5.22425000                  |



|    |             |             |             |
|----|-------------|-------------|-------------|
| H  | -1.67899300 | -1.37982300 | 3.89301000  |
| H  | -1.23658900 | -0.48199700 | 5.33953200  |
| H  | 0.02180600  | -1.06179300 | 4.25000600  |
| H  | -2.77235000 | 1.36901900  | 4.73607300  |
| H  | -3.28158700 | 0.38707800  | 3.36918500  |
| H  | -2.78768500 | 2.07260300  | 3.11201400  |
| C  | 3.12666900  | 2.74953800  | -0.68612000 |
| C  | 3.28654600  | 4.21891000  | -0.29087100 |
| C  | 2.76552200  | 2.64613500  | -2.16190200 |
| C  | 4.45122300  | 2.01775300  | -0.44787400 |
| H  | 3.69257100  | 4.33661400  | 0.71747900  |
| H  | 2.34607000  | 4.77105500  | -0.36175100 |
| H  | 4.00093300  | 4.68277400  | -0.98114100 |
| H  | 2.70548600  | 1.60288300  | -2.48317600 |
| H  | 3.55330200  | 3.12870700  | -2.75260800 |
| H  | 1.81864800  | 3.14117800  | -2.39162100 |
| H  | 5.23917500  | 2.52470900  | -1.01645700 |
| H  | 4.41069000  | 0.98179500  | -0.79455000 |
| H  | 4.75778600  | 2.02196900  | 0.60358200  |
| Co | 1.21506200  | -0.39592000 | 0.52382400  |
| C  | -2.24483200 | 1.95581800  | -2.80817300 |
| C  | -1.76668800 | 0.99935400  | -1.91839200 |
| C  | -0.49111300 | 0.42525600  | -2.07712900 |
| C  | 0.26048100  | 0.82396300  | -3.19048500 |
| C  | -0.21389100 | 1.78377300  | -4.08056900 |
| C  | -1.46367700 | 2.36530000  | -3.88717700 |
| H  | -3.23433100 | 2.38167900  | -2.65774700 |
| H  | -2.39843100 | 0.68606300  | -1.09245200 |
| H  | 1.23154900  | 0.37333500  | -3.36659000 |
| H  | 0.39946300  | 2.07380200  | -4.92984400 |
| H  | -1.83252100 | 3.12005100  | -4.57627600 |
| C  | -0.02031700 | -0.62245100 | -1.14153200 |
| C  | -0.49644500 | -1.87958200 | -1.22407100 |
| C  | -1.58958200 | -2.42654500 | -2.08676300 |
| H  | -2.43341500 | -1.72501200 | -2.15302400 |
| H  | -1.26829900 | -2.63739900 | -3.11381800 |
| N  | -1.95566100 | -3.69179600 | -1.40384800 |
| C  | -1.30150400 | -3.76923600 | -0.07705400 |
| H  | -1.11964600 | -4.81295100 | 0.18526600  |
| H  | -1.92733300 | -3.31392900 | 0.70966400  |
| C  | -0.03267400 | -2.93578200 | -0.27008600 |
| C  | 0.57854000  | -2.29380700 | 0.95910900  |
| H  | 0.71073100  | -3.56156300 | -0.78959600 |
| H  | 1.44455600  | -2.84985700 | 1.33220400  |

|   |             |             |             |
|---|-------------|-------------|-------------|
| H | -0.15019600 | -2.22291300 | 1.77481800  |
| S | -3.57060800 | -4.12695300 | -1.47236300 |
| O | -3.67356200 | -5.39355400 | -0.75293700 |
| O | -3.96272200 | -4.00036300 | -2.87330900 |
| C | -4.44618500 | -2.89036900 | -0.54448700 |
| C | -4.62139300 | -3.05800000 | 0.82976200  |
| C | -4.87525500 | -1.72027200 | -1.17976100 |
| C | -5.21841300 | -2.04134300 | 1.56870400  |
| H | -4.30826300 | -3.98224500 | 1.30696600  |
| C | -5.46229100 | -0.71405900 | -0.42412000 |
| H | -4.76445900 | -1.61273700 | -2.25510600 |
| C | -5.63453300 | -0.85177800 | 0.96074600  |
| H | -5.35785700 | -2.16801100 | 2.64018400  |
| H | -5.79525800 | 0.19822000  | -0.91508000 |
| C | -6.22394100 | 0.26316000  | 1.76360700  |
| H | -5.58430800 | 1.15400100  | 1.72562600  |
| H | -6.34774700 | -0.01388100 | 2.81344800  |
| H | -7.20132600 | 0.56635700  | 1.37447600  |
| C | 4.94568300  | -1.70762700 | -0.65881400 |
| C | 4.56119400  | -1.53746000 | -2.01161000 |
| C | 5.50034300  | -1.71195300 | -3.03571100 |
| C | 6.80856100  | -2.02149800 | -2.69711800 |
| C | 7.18839800  | -2.13510200 | -1.35260400 |
| C | 6.27332400  | -1.97461500 | -0.31702100 |
| C | 2.74431300  | -1.05911600 | -0.72410500 |
| C | 3.19235100  | -1.13277100 | -2.01910600 |
| H | 5.20371800  | -1.59005800 | -4.07396100 |
| H | 7.55189000  | -2.15924900 | -3.47677000 |
| H | 8.22377700  | -2.34877900 | -1.10433700 |
| H | 6.61918400  | -2.03744700 | 0.70637600  |
| H | 1.44899900  | -1.05655700 | -0.89526500 |
| H | 2.59075900  | -0.94687400 | -2.89783100 |
| N | 3.80287200  | -1.46602000 | 0.12290500  |
| C | 3.69517300  | -1.39699900 | 1.50055900  |
| C | 4.59122800  | -2.00636300 | 2.38421300  |
| N | 2.60691200  | -0.72592700 | 1.94163700  |
| C | 4.40104000  | -1.84883100 | 3.74667000  |
| H | 5.38805600  | -2.63329200 | 2.01127900  |
| C | 2.43949300  | -0.59253600 | 3.26706800  |
| C | 3.31614500  | -1.10550000 | 4.20495900  |
| H | 5.08733300  | -2.31954700 | 4.44321700  |
| H | 1.55176500  | -0.05414300 | 3.56542000  |
| H | 3.12750500  | -0.95174200 | 5.26123600  |

**TS2S**

|                                              |             |                  |                             |
|----------------------------------------------|-------------|------------------|-----------------------------|
| Zero-point correction=                       |             |                  | 0.970415 (Hartree/Particle) |
| Thermal correction to Energy=                |             |                  | 1.028024                    |
| Thermal correction to Enthalpy=              |             |                  | 1.028968                    |
| Thermal correction to Gibbs Free Energy=     |             |                  | 0.882515                    |
| Sum of electronic and zero-point Energies=   |             |                  | -3589.270916                |
| Sum of electronic and thermal Energies=      |             |                  | -3589.213307                |
| Sum of electronic and thermal Enthalpies=    |             |                  | -3589.212362                |
| Sum of electronic and thermal Free Energies= |             |                  | -3589.358816                |
| Imaginary frequency=                         | -1120.79    | cm <sup>-1</sup> |                             |
| C                                            | -4.53945300 | -6.17746400      | -0.54871800                 |
| C                                            | -3.45939900 | -5.62213400      | 0.09702600                  |
| C                                            | -3.32827300 | -4.21646800      | 0.15400100                  |
| C                                            | -4.32626800 | -3.38838400      | -0.44573200                 |
| C                                            | -5.41742500 | -3.98684600      | -1.11448000                 |
| C                                            | -5.51709900 | -5.35811600      | -1.16026200                 |
| H                                            | -4.64389700 | -7.25707500      | -0.59834900                 |
| H                                            | -2.69084500 | -6.23378600      | 0.56105600                  |
| H                                            | -6.16184000 | -3.34122700      | -1.57185100                 |
| H                                            | -6.35636900 | -5.82305700      | -1.66888700                 |
| C                                            | -3.19396100 | -1.51996900      | 0.24147200                  |
| C                                            | -2.14815800 | -2.34607900      | 0.76080600                  |
| N                                            | -4.24345800 | -2.03397300      | -0.36923100                 |
| N                                            | -2.23083800 | -3.66231900      | 0.73317200                  |
| P                                            | -2.99133700 | 0.29297400       | 0.45939500                  |
| P                                            | -0.53572600 | -1.59090400      | 1.29116300                  |
| C                                            | -3.68987900 | 0.42870600       | 2.15093000                  |
| H                                            | -4.67572400 | -0.04087900      | 2.19942400                  |
| H                                            | -3.77590800 | 1.47592900       | 2.45161100                  |
| H                                            | -3.03779800 | -0.07833700      | 2.86542200                  |
| C                                            | 0.55030200  | -2.69706200      | 0.30526600                  |
| H                                            | 0.20449000  | -3.72160100      | 0.45311600                  |
| H                                            | 1.59736900  | -2.62653700      | 0.60892800                  |
| H                                            | 0.47352200  | -2.46256200      | -0.75571800                 |
| C                                            | -0.22318000 | -2.27470200      | 3.05255200                  |
| C                                            | -1.45672300 | -2.10025100      | 3.93554500                  |
| C                                            | 0.98292200  | -1.52239200      | 3.61678500                  |
| C                                            | 0.11421800  | -3.76877400      | 3.02162800                  |
| H                                            | -2.32604900 | -2.62762700      | 3.52790800                  |
| H                                            | -1.73955000 | -1.05926900      | 4.10297100                  |
| H                                            | -1.25071700 | -2.52838800      | 4.92312100                  |
| H                                            | 1.86353900  | -1.63224400      | 2.97125300                  |
| H                                            | 1.24609900  | -1.94049500      | 4.59549700                  |
| H                                            | 0.79593000  | -0.45302300      | 3.75260100                  |

|    |             |             |             |
|----|-------------|-------------|-------------|
| H  | 0.21445100  | -4.11222400 | 4.05816600  |
| H  | 1.06443200  | -3.97243100 | 2.52228400  |
| H  | -0.66899200 | -4.36362900 | 2.54414500  |
| C  | -4.30447900 | 1.16525700  | -0.57736900 |
| C  | -5.72703600 | 0.72739900  | -0.21727200 |
| C  | -4.02661700 | 0.89301600  | -2.05404000 |
| C  | -4.19727300 | 2.66472600  | -0.28365900 |
| H  | -6.00105100 | 1.02352700  | 0.79994000  |
| H  | -5.87858200 | -0.34720800 | -0.32557700 |
| H  | -6.41918200 | 1.23989700  | -0.89645900 |
| H  | -3.00121400 | 1.15802200  | -2.33593200 |
| H  | -4.70648900 | 1.49497300  | -2.66852900 |
| H  | -4.19122100 | -0.15905200 | -2.30662600 |
| H  | -5.00497300 | 3.18157400  | -0.81453800 |
| H  | -3.25509700 | 3.09276300  | -0.62421800 |
| H  | -4.31820900 | 2.88949300  | 0.78221500  |
| Co | -0.63061600 | 0.71454700  | 0.55242900  |
| C  | -1.95538000 | -1.66493700 | -3.77687000 |
| C  | -1.33945600 | -1.34295100 | -2.57149700 |
| C  | -0.41232600 | -0.29423200 | -2.48279300 |
| C  | -0.10110300 | 0.40342700  | -3.66448800 |
| C  | -0.72107900 | 0.08823200  | -4.86965000 |
| C  | -1.65796200 | -0.94242900 | -4.93021400 |
| H  | -2.67476000 | -2.48024100 | -3.80892600 |
| H  | -1.57070900 | -1.92471100 | -1.68558500 |
| H  | 0.63005500  | 1.20829400  | -3.62534200 |
| H  | -0.46990500 | 0.65012200  | -5.76534600 |
| H  | -2.14666300 | -1.18341600 | -5.87012700 |
| C  | 0.25915400  | 0.03879600  | -1.20990700 |
| C  | 1.58421300  | -0.12287700 | -1.02894400 |
| C  | 2.65651300  | -0.61660800 | -1.95735800 |
| H  | 2.57201100  | -1.68426600 | -2.19268500 |
| H  | 2.65911700  | -0.08433500 | -2.91478000 |
| N  | 3.93431800  | -0.32953700 | -1.24263200 |
| C  | 3.61861500  | 0.60675600  | -0.13139300 |
| H  | 3.64272900  | 1.62849400  | -0.52941400 |
| H  | 4.37209000  | 0.52942100  | 0.65707600  |
| C  | 2.20516300  | 0.20099600  | 0.28768400  |
| C  | 1.30672500  | 1.11401700  | 1.06985400  |
| H  | 2.31346000  | -0.74908500 | 0.83564500  |
| H  | 1.47369300  | 2.17045600  | 0.81736800  |
| H  | 1.40645400  | 0.99785900  | 2.15289600  |
| S  | 4.76373900  | -1.71562900 | -0.73250600 |
| O  | 4.79371800  | -2.60249900 | -1.89658400 |

|   |             |             |             |
|---|-------------|-------------|-------------|
| O | 4.25913000  | -2.24061700 | 0.54608400  |
| C | 6.37118800  | -1.02881800 | -0.43699600 |
| C | 7.05381400  | -0.41233200 | -1.48798100 |
| C | 6.94351400  | -1.14117500 | 0.82625700  |
| C | 8.32082800  | 0.10041300  | -1.25721500 |
| H | 6.59195400  | -0.33089100 | -2.46769200 |
| C | 8.21770900  | -0.62274000 | 1.03790300  |
| H | 6.39354400  | -1.62651300 | 1.62645600  |
| C | 8.92338300  | 0.00509500  | 0.00712600  |
| H | 8.85814300  | 0.58610600  | -2.06819700 |
| H | 8.67321700  | -0.70589100 | 2.02152000  |
| C | 10.28864300 | 0.56890900  | 0.23732400  |
| H | 10.64469500 | 0.36478700  | 1.24966100  |
| H | 10.29979000 | 1.65428200  | 0.08967900  |
| H | 11.01473800 | 0.15285000  | -0.46848100 |
| C | -1.11561200 | 4.73376000  | -0.19860300 |
| C | -1.18955300 | 4.40987100  | -1.57744800 |
| C | -1.44971000 | 5.40932900  | -2.52326200 |
| C | -1.65729500 | 6.70694600  | -2.08381700 |
| C | -1.62743900 | 7.00729200  | -0.71457900 |
| C | -1.36867700 | 6.03367400  | 0.24540700  |
| C | -0.80667400 | 2.47012300  | -0.44759300 |
| C | -1.00433000 | 3.00079900  | -1.70061800 |
| H | -1.49748500 | 5.15907100  | -3.57937700 |
| H | -1.85782900 | 7.49726200  | -2.80120600 |
| H | -1.81553400 | 8.02528700  | -0.38572900 |
| H | -1.38488600 | 6.30901000  | 1.29160600  |
| H | 0.00885800  | 1.45545500  | -0.71153900 |
| H | -0.99978100 | 2.43798500  | -2.62317200 |
| N | -0.83468400 | 3.53853400  | 0.48174600  |
| C | -0.83641700 | 3.27196600  | 1.84129800  |
| C | -0.68489500 | 4.24654600  | 2.83189900  |
| N | -0.95329800 | 1.95796600  | 2.14389700  |
| C | -0.71313200 | 3.85952500  | 4.16083700  |
| H | -0.49809100 | 5.27657100  | 2.56599300  |
| C | -0.96816900 | 1.60722500  | 3.43960700  |
| C | -0.87566300 | 2.51350500  | 4.47971200  |
| H | -0.59140300 | 4.60517600  | 4.93992100  |
| H | -1.05414600 | 0.54512000  | 3.62384700  |
| H | -0.90463900 | 2.16530100  | 5.50546300  |

### M3R

|                               |                             |
|-------------------------------|-----------------------------|
| Zero-point correction=        | 0.973557 (Hartree/Particle) |
| Thermal correction to Energy= | 1.032319                    |

|                                              |             |             |              |
|----------------------------------------------|-------------|-------------|--------------|
| Thermal correction to Enthalpy=              |             |             | 1.033263     |
| Thermal correction to Gibbs Free Energy=     |             |             | 0.881580     |
| Sum of electronic and zero-point Energies=   |             |             | -3589.334705 |
| Sum of electronic and thermal Energies=      |             |             | -3589.275943 |
| Sum of electronic and thermal Enthalpies=    |             |             | -3589.274999 |
| Sum of electronic and thermal Free Energies= |             |             | -3589.426682 |
| C                                            | 7.44124900  | -3.08275600 | 2.64296600   |
| C                                            | 6.07471300  | -2.93745900 | 2.67931200   |
| C                                            | 5.40857900  | -2.31988600 | 1.59689200   |
| C                                            | 6.16964800  | -1.83066400 | 0.48501300   |
| C                                            | 7.57236300  | -2.00589800 | 0.47187700   |
| C                                            | 8.19090300  | -2.62142400 | 1.53447100   |
| H                                            | 7.95618700  | -3.56233500 | 3.46979900   |
| H                                            | 5.48071500  | -3.29482400 | 3.51536400   |
| H                                            | 8.13233000  | -1.63242000 | -0.38063900  |
| H                                            | 9.26876600  | -2.75283200 | 1.53096800   |
| C                                            | 4.25470200  | -1.01942900 | -0.46855600  |
| C                                            | 3.49123100  | -1.62790600 | 0.57168100   |
| N                                            | 5.56706000  | -1.15955500 | -0.53118400  |
| N                                            | 4.05268600  | -2.23977500 | 1.59860800   |
| P                                            | 3.36696400  | 0.10944200  | -1.62748800  |
| P                                            | 1.67433700  | -1.68638300 | 0.36406300   |
| C                                            | 3.75902900  | -0.49722400 | -3.30747100  |
| H                                            | 4.79783700  | -0.83190600 | -3.37171300  |
| H                                            | 3.60701500  | 0.32014900  | -4.01884000  |
| H                                            | 3.10242300  | -1.32219600 | -3.59087200  |
| C                                            | 1.01607100  | -1.88368100 | 2.04678900   |
| H                                            | 1.16244600  | -2.90989700 | 2.39513400   |
| H                                            | -0.05227700 | -1.65199300 | 2.06182400   |
| H                                            | 1.53588900  | -1.21771800 | 2.73732600   |
| C                                            | 1.41326400  | -3.36912400 | -0.48214300  |
| C                                            | 1.68944300  | -3.15950100 | -1.96861600  |
| C                                            | -0.02801200 | -3.83274000 | -0.27042500  |
| C                                            | 2.36242700  | -4.42540400 | 0.07861300   |
| H                                            | 2.74997300  | -2.95545000 | -2.15285400  |
| H                                            | 1.09991800  | -2.32430700 | -2.37360600  |
| H                                            | 1.42763700  | -4.06075100 | -2.53452500  |
| H                                            | -0.29236800 | -3.90174200 | 0.78953900   |
| H                                            | -0.13413700 | -4.83605000 | -0.69826900  |
| H                                            | -0.75736100 | -3.18962300 | -0.76766200  |
| H                                            | 2.12084500  | -5.38984900 | -0.38282600  |
| H                                            | 2.26431600  | -4.54720200 | 1.16208100   |
| H                                            | 3.41007300  | -4.20757300 | -0.14688800  |
| C                                            | 4.37598400  | 1.71188300  | -1.51931500  |

|    |             |             |             |
|----|-------------|-------------|-------------|
| C  | 5.70529400  | 1.58565800  | -2.26432800 |
| C  | 4.63950700  | 2.05353000  | -0.05383000 |
| C  | 3.54715400  | 2.82256400  | -2.16348000 |
| H  | 5.56694200  | 1.47137700  | -3.34342000 |
| H  | 6.31025300  | 0.75256600  | -1.89808100 |
| H  | 6.27290800  | 2.51051100  | -2.10629600 |
| H  | 3.71672200  | 2.09119400  | 0.53361800  |
| H  | 5.11023400  | 3.04189000  | 0.00075800  |
| H  | 5.32259900  | 1.34122700  | 0.41912800  |
| H  | 4.17354500  | 3.71497200  | -2.27499300 |
| H  | 2.69314900  | 3.09910200  | -1.54181000 |
| H  | 3.18295700  | 2.55261100  | -3.16185800 |
| Co | 1.06934500  | -0.03449700 | -1.01831100 |
| C  | -4.23750700 | 1.63636100  | 4.61650600  |
| C  | -3.86822600 | 1.39514700  | 3.29725100  |
| C  | -2.55280200 | 1.00847800  | 2.97505700  |
| C  | -1.63309200 | 0.88855900  | 4.03585500  |
| C  | -2.00224600 | 1.13269900  | 5.35172000  |
| C  | -3.31188500 | 1.50585300  | 5.65034800  |
| H  | -5.25916300 | 1.93390400  | 4.83789600  |
| H  | -4.61322400 | 1.52392200  | 2.51976200  |
| H  | -0.60700500 | 0.60730400  | 3.80294200  |
| H  | -1.26695300 | 1.03358500  | 6.14594800  |
| H  | -3.60704400 | 1.69969600  | 6.67783700  |
| C  | -2.06343500 | 0.72324400  | 1.63240900  |
| C  | -2.70333300 | 0.70235700  | 0.44910400  |
| C  | -4.16968800 | 0.90691500  | 0.19837500  |
| H  | -4.76513800 | 0.22434000  | 0.82959700  |
| H  | -4.52262100 | 1.92480900  | 0.39881400  |
| N  | -4.32676100 | 0.60254100  | -1.23882600 |
| C  | -3.20739400 | -0.25303300 | -1.65245100 |
| H  | -3.07389200 | -0.20772700 | -2.73580000 |
| H  | -3.35830300 | -1.30623500 | -1.35362700 |
| C  | -2.04179600 | 0.35631400  | -0.86687000 |
| C  | -0.83494000 | -0.56312800 | -0.80034600 |
| H  | -1.81223800 | 1.30211100  | -1.37981400 |
| H  | -0.76938800 | -1.15014400 | -1.73956300 |
| H  | -0.99658800 | -1.26950100 | 0.02003200  |
| S  | -5.86028100 | 0.18711900  | -1.76449100 |
| O  | -5.73746800 | -0.04601600 | -3.20096500 |
| O  | -6.75649900 | 1.20727300  | -1.22584400 |
| C  | -6.25428100 | -1.35779000 | -0.98652100 |
| C  | -5.90853000 | -2.55588400 | -1.61240300 |
| C  | -6.84807100 | -1.35876100 | 0.27818500  |

|   |             |             |             |
|---|-------------|-------------|-------------|
| C | -6.16737800 | -3.75882200 | -0.96455800 |
| H | -5.46031400 | -2.54317700 | -2.60179000 |
| C | -7.09581500 | -2.56982200 | 0.91069100  |
| H | -7.12956800 | -0.41948000 | 0.74556300  |
| C | -6.76199600 | -3.78742000 | 0.30231000  |
| H | -5.90959500 | -4.69594800 | -1.45265700 |
| H | -7.56341700 | -2.57477700 | 1.89254800  |
| C | -7.05141100 | -5.08385100 | 0.98911700  |
| H | -6.72885900 | -5.06397700 | 2.03449500  |
| H | -6.55779600 | -5.92327000 | 0.49371300  |
| H | -8.12706400 | -5.29289200 | 0.99851600  |
| C | 0.50808800  | 3.51088900  | 0.73188100  |
| C | 1.04850500  | 2.89293800  | 1.89122100  |
| C | 1.14841300  | 3.62732700  | 3.07828700  |
| C | 0.72531100  | 4.95066800  | 3.09230900  |
| C | 0.19756800  | 5.54534100  | 1.94035200  |
| C | 0.07871800  | 4.83635300  | 0.74629700  |
| C | 1.05169900  | 1.31903600  | 0.24910200  |
| C | 1.37583600  | 1.53558200  | 1.56179000  |
| H | 1.54918400  | 3.16182000  | 3.97565200  |
| H | 0.79721000  | 5.52982100  | 4.00879000  |
| H | -0.13539300 | 6.57860100  | 1.97139800  |
| H | -0.35466900 | 5.32579600  | -0.11739800 |
| H | -0.99808300 | 0.49633700  | 1.59408900  |
| H | 1.80755100  | 0.81164300  | 2.23938900  |
| N | 0.52087700  | 2.53064900  | -0.27197600 |
| C | 0.26095700  | 2.58152700  | -1.62438300 |
| C | -0.18611400 | 3.68653600  | -2.35357400 |
| N | 0.51479500  | 1.39875900  | -2.23563600 |
| C | -0.39030800 | 3.54334200  | -3.71606700 |
| H | -0.37110900 | 4.63340700  | -1.86807200 |
| C | 0.30478800  | 1.27060600  | -3.55552100 |
| C | -0.15030000 | 2.31675200  | -4.33710600 |
| H | -0.73936800 | 4.39277400  | -4.29459700 |
| H | 0.51755700  | 0.29045700  | -3.97627400 |
| H | -0.30776800 | 2.17401800  | -5.39949900 |

### M3S

|                                            |                             |
|--------------------------------------------|-----------------------------|
| Zero-point correction=                     | 0.974247 (Hartree/Particle) |
| Thermal correction to Energy=              | 1.032462                    |
| Thermal correction to Enthalpy=            | 1.033406                    |
| Thermal correction to Gibbs Free Energy=   | 0.884653                    |
| Sum of electronic and zero-point Energies= | -3589.332075                |
| Sum of electronic and thermal Energies=    | -3589.273859                |



|                                              |             |             |              |
|----------------------------------------------|-------------|-------------|--------------|
| Sum of electronic and thermal Enthalpies=    |             |             | -3589.272915 |
| Sum of electronic and thermal Free Energies= |             |             | -3589.421668 |
| C                                            | 7.13338800  | 3.47817400  | -0.99031600  |
| C                                            | 5.80759900  | 3.52001300  | -0.62871200  |
| C                                            | 5.01312000  | 2.35686400  | -0.74791900  |
| C                                            | 5.61028200  | 1.14115400  | -1.21878800  |
| C                                            | 6.97150000  | 1.13511400  | -1.59931800  |
| C                                            | 7.71430200  | 2.28585400  | -1.48448100  |
| H                                            | 7.74523600  | 4.37119500  | -0.90564700  |
| H                                            | 5.34145500  | 4.42991700  | -0.26226000  |
| H                                            | 7.40231100  | 0.20621100  | -1.96141800  |
| H                                            | 8.76224100  | 2.28377600  | -1.76815400  |
| C                                            | 3.63044500  | 0.04889700  | -0.88551200  |
| C                                            | 3.00346000  | 1.28876300  | -0.56984700  |
| N                                            | 4.89779700  | -0.01516700 | -1.25321900  |
| N                                            | 3.68504500  | 2.41502500  | -0.46830500  |
| P                                            | 2.65762700  | -1.47549800 | -0.57476600  |
| P                                            | 1.16806300  | 1.33065300  | -0.48006700  |
| C                                            | 2.82883500  | -2.47104000 | -2.09648800  |
| H                                            | 3.84955300  | -2.41768200 | -2.48496400  |
| H                                            | 2.58690900  | -3.51499000 | -1.87649300  |
| H                                            | 2.14115700  | -2.11129400 | -2.86596400  |
| C                                            | 0.85885400  | 2.83285300  | 0.48955400   |
| H                                            | 1.38625500  | 3.66651500  | 0.01689400   |
| H                                            | -0.20971400 | 3.04555400  | 0.52246900   |
| H                                            | 1.23331500  | 2.72817100  | 1.50892000   |
| C                                            | 0.70184600  | 1.83821800  | -2.25274200  |
| C                                            | 0.59318500  | 0.54678900  | -3.06078200  |
| C                                            | -0.62538500 | 2.60081700  | -2.22521100  |
| C                                            | 1.75867300  | 2.74181900  | -2.88520500  |
| H                                            | 1.57040700  | 0.05196200  | -3.13412000  |
| H                                            | -0.12494500 | -0.16252000 | -2.62371000  |
| H                                            | 0.26099200  | 0.76296800  | -4.08304100  |
| H                                            | -0.50641800 | 3.58941500  | -1.77140900  |
| H                                            | -0.96390300 | 2.75612400  | -3.25648400  |
| H                                            | -1.42766600 | 2.08119600  | -1.69167300  |
| H                                            | 1.37650200  | 3.10886400  | -3.84493900  |
| H                                            | 1.98741400  | 3.61408100  | -2.26454200  |
| H                                            | 2.69497900  | 2.21231000  | -3.08634200  |
| C                                            | 3.72563800  | -2.39433600 | 0.68979000   |
| C                                            | 4.96014800  | -3.00304500 | 0.02539900   |
| C                                            | 4.15038000  | -1.41365200 | 1.78200800   |
| C                                            | 2.87940300  | -3.51018200 | 1.30027400   |
| H                                            | 4.69787900  | -3.79739900 | -0.67992000  |

|    |             |             |             |
|----|-------------|-------------|-------------|
| H  | 5.56333300  | -2.25601800 | -0.49717700 |
| H  | 5.58290300  | -3.45460400 | 0.80675700  |
| H  | 3.29252700  | -0.89418700 | 2.22327100  |
| H  | 4.65165200  | -1.96735400 | 2.58380000  |
| H  | 4.85662400  | -0.66476900 | 1.40971000  |
| H  | 3.52795100  | -4.16748400 | 1.89053600  |
| H  | 2.12138100  | -3.10883600 | 1.97584100  |
| H  | 2.38509300  | -4.13007000 | 0.54251200  |
| Co | 0.43495200  | -0.78985700 | -0.12547300 |
| C  | -3.28340800 | 5.86741400  | 0.70935500  |
| C  | -3.05448600 | 4.49641700  | 0.65207400  |
| C  | -2.53036600 | 3.80579200  | 1.76036800  |
| C  | -2.20655400 | 4.55214900  | 2.90741900  |
| C  | -2.43784600 | 5.92096300  | 2.96400900  |
| C  | -2.98537300 | 6.58455500  | 1.86638800  |
| H  | -3.68736200 | 6.38006500  | -0.15982400 |
| H  | -3.24991600 | 3.96521500  | -0.27580800 |
| H  | -1.77565300 | 4.03644500  | 3.76339500  |
| H  | -2.18786500 | 6.47413000  | 3.86545400  |
| H  | -3.16436900 | 7.65539100  | 1.90721100  |
| C  | -2.26671000 | 2.36999100  | 1.75628500  |
| C  | -2.82440100 | 1.41822700  | 0.98859400  |
| C  | -3.96450300 | 1.55468200  | 0.02340000  |
| H  | -3.61055400 | 1.75999500  | -1.00233300 |
| H  | -4.66667000 | 2.35083200  | 0.29014100  |
| N  | -4.62324700 | 0.23449200  | 0.09910500  |
| C  | -3.81289600 | -0.71651000 | 0.89338300  |
| H  | -4.28472700 | -0.85368900 | 1.87338200  |
| H  | -3.76352700 | -1.69675300 | 0.40473700  |
| C  | -2.44399300 | -0.03867700 | 1.01329900  |
| C  | -1.53470100 | -0.37131200 | -0.18440100 |
| H  | -1.97815600 | -0.30320200 | 1.96694100  |
| H  | -1.87884000 | -1.30279600 | -0.65257900 |
| H  | -1.62377200 | 0.40763000  | -0.94982400 |
| S  | -5.45915300 | -0.31706800 | -1.22482400 |
| O  | -6.19912900 | -1.49533800 | -0.78052400 |
| O  | -6.13004200 | 0.85343400  | -1.78576400 |
| C  | -4.24896100 | -0.86894300 | -2.40092400 |
| C  | -3.85485000 | -2.20663400 | -2.40746500 |
| C  | -3.64772400 | 0.05670600  | -3.25873500 |
| C  | -2.84615300 | -2.61364400 | -3.27536800 |
| H  | -4.34670900 | -2.91962100 | -1.75179800 |
| C  | -2.63969600 | -0.36675500 | -4.11462300 |
| H  | -3.98637500 | 1.08911800  | -3.26717100 |

|   |             |             |             |
|---|-------------|-------------|-------------|
| C | -2.21646600 | -1.70419000 | -4.13220800 |
| H | -2.54781300 | -3.65916900 | -3.29656000 |
| H | -2.17660100 | 0.34760500  | -4.79211000 |
| C | -1.11456500 | -2.13980000 | -5.04487800 |
| H | -0.17806900 | -1.61720000 | -4.81328800 |
| H | -0.92802600 | -3.21451600 | -4.97327600 |
| H | -1.34356100 | -1.90793700 | -6.09002400 |
| C | -0.10163900 | -1.89185900 | 3.67805300  |
| C | 0.45485800  | -0.62537700 | 3.99997100  |
| C | 0.57265500  | -0.24787400 | 5.34222700  |
| C | 0.13724700  | -1.12197600 | 6.33090300  |
| C | -0.41566300 | -2.36338600 | 5.99618700  |
| C | -0.54436500 | -2.76630300 | 4.66792600  |
| C | 0.46404800  | -0.78675100 | 1.72913000  |
| C | 0.78659500  | 0.04033400  | 2.77088000  |
| H | 0.99592000  | 0.71914600  | 5.60191900  |
| H | 0.22097100  | -0.83795400 | 7.37631100  |
| H | -0.75988200 | -3.02971300 | 6.78176700  |
| H | -0.99484200 | -3.72644600 | 4.44877100  |
| H | -1.51898100 | 2.03127200  | 2.47714100  |
| H | 1.22537400  | 1.02570100  | 2.69259900  |
| N | -0.08758700 | -1.97771200 | 2.27757600  |
| C | -0.38060100 | -3.00524000 | 1.40853000  |
| C | -0.85858600 | -4.27703100 | 1.73643000  |
| N | -0.10972700 | -2.67387200 | 0.12414000  |
| C | -1.06150300 | -5.19182400 | 0.71549900  |
| H | -1.06345400 | -4.54882200 | 2.76151600  |
| C | -0.31858200 | -3.56491600 | -0.85731500 |
| C | -0.79209300 | -4.84073000 | -0.60809000 |
| H | -1.43089000 | -6.18391800 | 0.95574100  |
| H | -0.08918900 | -3.22133600 | -1.86493800 |
| H | -0.94347200 | -5.53618000 | -1.42529900 |

### TS3R

|                                              |                                   |
|----------------------------------------------|-----------------------------------|
| Zero-point correction=                       | 0.973410 (Hartree/Particle)       |
| Thermal correction to Energy=                | 1.031250                          |
| Thermal correction to Enthalpy=              | 1.032194                          |
| Thermal correction to Gibbs Free Energy=     | 0.883055                          |
| Sum of electronic and zero-point Energies=   | -3589.316885                      |
| Sum of electronic and thermal Energies=      | -3589.259045                      |
| Sum of electronic and thermal Enthalpies=    | -3589.258100                      |
| Sum of electronic and thermal Free Energies= | -3589.407239                      |
| Imaginary frequency=-339.79 cm <sup>-1</sup> |                                   |
| C                                            | 7.96817700 -2.46960900 2.80406800 |

|   |             |             |             |
|---|-------------|-------------|-------------|
| C | 6.63782400  | -2.18944200 | 3.00765800  |
| C | 5.82752100  | -1.80581100 | 1.91567000  |
| C | 6.41116100  | -1.68644700 | 0.61058300  |
| C | 7.77850200  | -1.99619100 | 0.43151600  |
| C | 8.53825900  | -2.37927900 | 1.51197200  |
| H | 8.59178400  | -2.77035700 | 3.64050700  |
| H | 6.17843100  | -2.26749500 | 3.98859900  |
| H | 8.20214400  | -1.90719300 | -0.56473000 |
| H | 9.59057700  | -2.61159200 | 1.37777100  |
| C | 4.40676200  | -0.97182900 | -0.21336000 |
| C | 3.80298300  | -1.23183900 | 1.04773400  |
| N | 5.67866500  | -1.23975900 | -0.44561400 |
| N | 4.49601300  | -1.60783000 | 2.10596400  |
| P | 3.34679200  | -0.11262100 | -1.44752300 |
| P | 1.97887600  | -1.17790200 | 1.08940400  |
| C | 3.70032700  | -0.97579300 | -3.01651400 |
| H | 4.77013700  | -1.18296800 | -3.10588700 |
| H | 3.38342800  | -0.35873900 | -3.86245400 |
| H | 3.15419100  | -1.92173600 | -3.05295200 |
| C | 1.59931500  | -0.84315700 | 2.83459300  |
| H | 1.93821800  | -1.67260100 | 3.46150400  |
| H | 0.52539600  | -0.70172500 | 2.97931100  |
| H | 2.12306200  | 0.06234800  | 3.15026600  |
| C | 1.51926400  | -3.00283400 | 0.81763900  |
| C | 1.56173300  | -3.26214700 | -0.68839700 |
| C | 0.11001100  | -3.24043800 | 1.35977700  |
| C | 2.49334400  | -3.94134200 | 1.52603900  |
| H | 2.56975800  | -3.11605700 | -1.09616800 |
| H | 0.87628000  | -2.60087000 | -1.23816500 |
| H | 1.27193100  | -4.29849900 | -0.89789500 |
| H | 0.05923600  | -3.10252800 | 2.44442700  |
| H | -0.17769900 | -4.27675100 | 1.14867700  |
| H | -0.64294100 | -2.59492300 | 0.89657700  |
| H | 2.11821400  | -4.96786400 | 1.43946100  |
| H | 2.59511900  | -3.71674700 | 2.59277500  |
| H | 3.49119500  | -3.91626500 | 1.07808700  |
| C | 4.23168600  | 1.55498400  | -1.62932700 |
| C | 5.58882600  | 1.38627000  | -2.31070800 |
| C | 4.40952000  | 2.15222600  | -0.23449500 |
| C | 3.35939900  | 2.47797600  | -2.47743200 |
| H | 5.48688300  | 1.06861400  | -3.35305500 |
| H | 6.23552100  | 0.67175900  | -1.79513700 |
| H | 6.09670100  | 2.35797400  | -2.31554300 |
| H | 3.45739900  | 2.21398100  | 0.30736800  |

|    |             |             |             |
|----|-------------|-------------|-------------|
| H  | 4.80507600  | 3.17045100  | -0.32297100 |
| H  | 5.11638900  | 1.57816000  | 0.37505800  |
| H  | 3.93600700  | 3.37278100  | -2.73832000 |
| H  | 2.47595100  | 2.80792300  | -1.92817200 |
| H  | 3.03850300  | 2.01050000  | -3.41587100 |
| Co | 1.22607600  | -0.03101600 | -0.66428100 |
| C  | -5.68746200 | 1.87066200  | 4.22110800  |
| C  | -4.96588200 | 1.48846900  | 3.09533500  |
| C  | -3.57391900 | 1.68884200  | 3.02813400  |
| C  | -2.94723200 | 2.28686400  | 4.13904900  |
| C  | -3.67018800 | 2.67230300  | 5.26037200  |
| C  | -5.04808100 | 2.46518700  | 5.30746200  |
| H  | -6.76056700 | 1.70058000  | 4.24946900  |
| H  | -5.49676100 | 1.01954100  | 2.27413000  |
| H  | -1.87093900 | 2.45221500  | 4.10237000  |
| H  | -3.15872500 | 3.13574900  | 6.09983300  |
| H  | -5.61838300 | 2.76168000  | 6.18320300  |
| C  | -2.72739700 | 1.31759200  | 1.90186600  |
| C  | -3.04199500 | 0.86059900  | 0.67699500  |
| C  | -4.40714700 | 0.57579400  | 0.12037200  |
| H  | -4.88629500 | -0.24802600 | 0.67991900  |
| H  | -5.08929300 | 1.43226700  | 0.14897400  |
| N  | -4.13946400 | 0.19024400  | -1.27905800 |
| C  | -2.79361100 | -0.38862000 | -1.33169200 |
| H  | -2.41942000 | -0.39548000 | -2.35816700 |
| H  | -2.77275100 | -1.42016800 | -0.93538400 |
| C  | -2.02169800 | 0.54946500  | -0.40299400 |
| C  | -0.69426500 | -0.02966700 | 0.07476200  |
| H  | -1.88405800 | 1.48046300  | -0.96722600 |
| H  | -0.51676100 | -0.98279500 | -0.47983400 |
| H  | -0.73345500 | -0.26826600 | 1.13829500  |
| S  | -5.36729100 | -0.61134700 | -2.09057800 |
| O  | -4.84493000 | -0.88560800 | -3.42642000 |
| O  | -6.56863100 | 0.19246700  | -1.88425500 |
| C  | -5.58893000 | -2.15880300 | -1.25262800 |
| C  | -4.81984300 | -3.26150400 | -1.62654200 |
| C  | -6.47762000 | -2.23890600 | -0.17780900 |
| C  | -4.95298700 | -4.45171400 | -0.92056800 |
| H  | -4.14263300 | -3.18945600 | -2.47297200 |
| C  | -6.59665500 | -3.43600600 | 0.51548400  |
| H  | -7.07983600 | -1.37661900 | 0.09224700  |
| C  | -5.83875400 | -4.55931700 | 0.15828800  |
| H  | -4.36378400 | -5.31753600 | -1.21300500 |
| H  | -7.29359600 | -3.50543500 | 1.34739100  |

|   |             |             |             |
|---|-------------|-------------|-------------|
| C | -5.99836900 | -5.84877500 | 0.89767300  |
| H | -6.04805200 | -5.68908500 | 1.97880500  |
| H | -5.17841000 | -6.53994800 | 0.68866300  |
| H | -6.92977000 | -6.35064700 | 0.61158600  |
| C | 0.17498800  | 3.77369400  | -0.26269100 |
| C | 0.41620000  | 3.58982200  | 1.12653700  |
| C | 0.41710900  | 4.70941100  | 1.96974400  |
| C | 0.21223400  | 5.97001400  | 1.42132500  |
| C | 0.02391900  | 6.13332100  | 0.04312100  |
| C | 0.00928000  | 5.03771700  | -0.82004300 |
| C | 0.57769000  | 1.53105800  | 0.14266900  |
| C | 0.63724200  | 2.19698700  | 1.35485100  |
| H | 0.58839800  | 4.58800100  | 3.03649500  |
| H | 0.21216000  | 6.84349100  | 2.06726100  |
| H | -0.11153000 | 7.12904500  | -0.36839800 |
| H | -0.11203600 | 5.19210100  | -1.88648000 |
| H | -1.66320500 | 1.45936400  | 2.09131100  |
| H | 0.79975100  | 1.73108200  | 2.31731000  |
| N | 0.24462200  | 2.50374500  | -0.84503300 |
| C | 0.09939200  | 2.07116500  | -2.14539800 |
| C | -0.50780600 | 2.77446200  | -3.18922700 |
| N | 0.55907000  | 0.80725200  | -2.31451900 |
| C | -0.61481600 | 2.15758600  | -4.42506300 |
| H | -0.92168800 | 3.76018800  | -3.02240500 |
| C | 0.43254600  | 0.21660800  | -3.51661700 |
| C | -0.13706100 | 0.85756200  | -4.60141400 |
| H | -1.08988000 | 2.68443300  | -5.24634200 |
| H | 0.81310700  | -0.79980300 | -3.58333300 |
| H | -0.21572300 | 0.34685400  | -5.55379700 |

### TS3S

|                                              |            |            |                             |
|----------------------------------------------|------------|------------|-----------------------------|
| Zero-point correction=                       |            |            | 0.973546 (Hartree/Particle) |
| Thermal correction to Energy=                |            |            | 1.030977                    |
| Thermal correction to Enthalpy=              |            |            | 1.031921                    |
| Thermal correction to Gibbs Free Energy=     |            |            | 0.885897                    |
| Sum of electronic and zero-point Energies=   |            |            | -3589.311745                |
| Sum of electronic and thermal Energies=      |            |            | -3589.254315                |
| Sum of electronic and thermal Enthalpies=    |            |            | -3589.253371                |
| Sum of electronic and thermal Free Energies= |            |            | -3589.399394                |
| Imaginary frequency=-339.16 cm <sup>-1</sup> |            |            |                             |
| C                                            | 7.10657300 | 3.67451500 | -0.56523500                 |
| C                                            | 5.76927100 | 3.66776400 | -0.24499000                 |
| C                                            | 5.00445600 | 2.49801400 | -0.45445800                 |
| C                                            | 5.64258200 | 1.32237700 | -0.97274600                 |

|   |             |             |             |
|---|-------------|-------------|-------------|
| C | 7.01438100  | 1.36776900  | -1.31066500 |
| C | 7.72835400  | 2.52478300  | -1.10706000 |
| H | 7.69532900  | 4.57334600  | -0.40772900 |
| H | 5.27182300  | 4.54540600  | 0.15749000  |
| H | 7.47798900  | 0.47016900  | -1.70982900 |
| H | 8.78455400  | 2.55940300  | -1.35662400 |
| C | 3.68363800  | 0.17555000  | -0.75867000 |
| C | 3.02161500  | 1.37997700  | -0.39687200 |
| N | 4.95979500  | 0.15219500  | -1.09600700 |
| N | 3.66613400  | 2.51623900  | -0.21302800 |
| P | 2.69647100  | -1.35819400 | -0.55999200 |
| P | 1.19276800  | 1.32414500  | -0.39153000 |
| C | 3.14148200  | -2.37740800 | -2.00618600 |
| H | 4.20659500  | -2.26647300 | -2.22788500 |
| H | 2.92943200  | -3.43058700 | -1.80201300 |
| H | 2.56571800  | -2.06681200 | -2.88211300 |
| C | 0.75677300  | 2.77103200  | 0.61306800  |
| H | 1.21218300  | 3.66949000  | 0.18676300  |
| H | -0.32581100 | 2.89232400  | 0.64961300  |
| H | 1.13427000  | 2.64558200  | 1.63075500  |
| C | 0.81086000  | 1.84125100  | -2.18185200 |
| C | 0.92740900  | 0.58539500  | -3.04712400 |
| C | -0.61602200 | 2.38447400  | -2.21980100 |
| C | 1.77010100  | 2.91198500  | -2.69403000 |
| H | 1.95868000  | 0.21284400  | -3.08483100 |
| H | 0.28040500  | -0.22510700 | -2.67507800 |
| H | 0.62596800  | 0.80896100  | -4.07773600 |
| H | -0.71196500 | 3.31362400  | -1.64846000 |
| H | -0.88933200 | 2.60671900  | -3.25817600 |
| H | -1.34972900 | 1.66669500  | -1.83836500 |
| H | 1.42832500  | 3.24909900  | -3.67986900 |
| H | 1.80718600  | 3.79107300  | -2.04277300 |
| H | 2.78992700  | 2.53303300  | -2.81261900 |
| C | 3.60261400  | -2.19126200 | 0.88764600  |
| C | 4.99148300  | -2.65954000 | 0.45565100  |
| C | 3.71458800  | -1.17599500 | 2.02475200  |
| C | 2.79462200  | -3.39981600 | 1.35628200  |
| H | 4.94264600  | -3.47431800 | -0.27344900 |
| H | 5.59795100  | -1.85486300 | 0.03242900  |
| H | 5.51383700  | -3.04393000 | 1.33973900  |
| H | 2.74247600  | -0.73089700 | 2.27101300  |
| H | 4.08499100  | -1.68156200 | 2.92386000  |
| H | 4.41598300  | -0.36716900 | 1.79201400  |
| H | 3.41236300  | -3.99280700 | 2.04033900  |

|    |             |             |             |
|----|-------------|-------------|-------------|
| H  | 1.90198800  | -3.09884000 | 1.90771200  |
| H  | 2.49751400  | -4.05868800 | 0.53144000  |
| Co | 0.52157000  | -0.80880800 | -0.17453000 |
| C  | -3.01578600 | 5.96231200  | 0.54762100  |
| C  | -2.83664200 | 4.58320400  | 0.58154400  |
| C  | -2.62318800 | 3.91365400  | 1.79973400  |
| C  | -2.56101000 | 4.68326300  | 2.97462500  |
| C  | -2.74510700 | 6.05992000  | 2.93986200  |
| C  | -2.97938700 | 6.70528800  | 1.72591400  |
| H  | -3.17333800 | 6.46019900  | -0.40543600 |
| H  | -2.82303600 | 4.02451700  | -0.35109300 |
| H  | -2.37654100 | 4.18178000  | 3.92248200  |
| H  | -2.70348800 | 6.63320200  | 3.86205200  |
| H  | -3.11829900 | 7.78237200  | 1.69708800  |
| C  | -2.43161100 | 2.46892000  | 1.88588100  |
| C  | -2.88962200 | 1.52135500  | 1.04870600  |
| C  | -3.85480900 | 1.69662100  | -0.08817600 |
| H  | -3.34306300 | 1.80177300  | -1.06034200 |
| H  | -4.50151200 | 2.57155000  | 0.03051500  |
| N  | -4.64829800 | 0.45366900  | -0.03960000 |
| C  | -4.03704700 | -0.52859500 | 0.88125400  |
| H  | -4.65468000 | -0.60509000 | 1.78258300  |
| H  | -3.99189700 | -1.52351100 | 0.42489200  |
| C  | -2.65343900 | 0.04191300  | 1.21605000  |
| C  | -1.57847400 | -0.52474900 | 0.26191400  |
| H  | -2.40377400 | -0.19848900 | 2.25248700  |
| H  | -1.89379100 | -1.52176200 | -0.05011100 |
| H  | -1.49859600 | 0.09429600  | -0.64670400 |
| S  | -5.35965800 | -0.09569200 | -1.43649300 |
| O  | -6.25074500 | -1.18190800 | -1.03933600 |
| O  | -5.84760300 | 1.09385200  | -2.12945400 |
| C  | -4.06038900 | -0.80476000 | -2.41635200 |
| C  | -3.76708800 | -2.16398600 | -2.30032400 |
| C  | -3.29611800 | 0.02269400  | -3.24290200 |
| C  | -2.69853600 | -2.69188700 | -3.01829700 |
| H  | -4.38453900 | -2.80098800 | -1.67381500 |
| C  | -2.23164100 | -0.52139100 | -3.94935600 |
| H  | -3.55293900 | 1.07354100  | -3.34681600 |
| C  | -1.91263800 | -1.88315900 | -3.84813400 |
| H  | -2.47667700 | -3.75405200 | -2.94585800 |
| H  | -1.63926300 | 0.11687700  | -4.60139400 |
| C  | -0.77445900 | -2.45325500 | -4.63323700 |
| H  | 0.14912200  | -1.88329700 | -4.47708900 |
| H  | -0.58323800 | -3.49767100 | -4.37325800 |



|   |             |             |             |
|---|-------------|-------------|-------------|
| H | -0.97874900 | -2.41470400 | -5.70887900 |
| C | -0.40498600 | -2.31165200 | 3.38290700  |
| C | -0.12900600 | -0.99909700 | 3.85982300  |
| C | -0.03702800 | -0.78726300 | 5.24289400  |
| C | -0.20382100 | -1.86321100 | 6.10681500  |
| C | -0.44529900 | -3.15149900 | 5.61505300  |
| C | -0.54390200 | -3.39438600 | 4.24408300  |
| C | -0.10254500 | -0.89240500 | 1.57644600  |
| C | 0.03043900  | -0.13882500 | 2.73023300  |
| H | 0.17022300  | 0.20763400  | 5.62874200  |
| H | -0.13683900 | -1.70552800 | 7.17987500  |
| H | -0.55881000 | -3.98073400 | 6.30705000  |
| H | -0.71367900 | -4.40405600 | 3.88818300  |
| H | -1.85187900 | 2.12354300  | 2.74374200  |
| H | 0.20761800  | 0.92754400  | 2.76294700  |
| N | -0.41698400 | -2.22602100 | 1.98427400  |
| C | -0.43188900 | -3.19311600 | 1.00533200  |
| C | -0.89241600 | -4.50476400 | 1.14055500  |
| N | 0.05018400  | -2.73166900 | -0.17901300 |
| C | -0.83178100 | -5.34474700 | 0.03960600  |
| H | -1.31601900 | -4.84603700 | 2.07542100  |
| C | 0.07851000  | -3.55229200 | -1.24282900 |
| C | -0.33622500 | -4.87058500 | -1.17603800 |
| H | -1.18513400 | -6.36741100 | 0.12700800  |
| H | 0.45709200  | -3.11403000 | -2.16329300 |
| H | -0.28807700 | -5.50030800 | -2.05713900 |

#### M4R

|                                              |            |             |                             |
|----------------------------------------------|------------|-------------|-----------------------------|
| Zero-point correction=                       |            |             | 0.974847 (Hartree/Particle) |
| Thermal correction to Energy=                |            |             | 1.033452                    |
| Thermal correction to Enthalpy=              |            |             | 1.034397                    |
| Thermal correction to Gibbs Free Energy=     |            |             | 0.883758                    |
| Sum of electronic and zero-point Energies=   |            |             | -3589.345499                |
| Sum of electronic and thermal Energies=      |            |             | -3589.286894                |
| Sum of electronic and thermal Enthalpies=    |            |             | -3589.285949                |
| Sum of electronic and thermal Free Energies= |            |             | -3589.436588                |
| C                                            | 7.96591300 | -3.17673100 | 2.13004100                  |
| C                                            | 6.61400600 | -3.03712400 | 2.34381400                  |
| C                                            | 5.84358000 | -2.23806900 | 1.47026700                  |
| C                                            | 6.48610200 | -1.56546000 | 0.38033100                  |
| C                                            | 7.87463800 | -1.73471000 | 0.18213800                  |
| C                                            | 8.59686000 | -2.52661200 | 1.04457600                  |
| H                                            | 8.55869700 | -3.79546900 | 2.79706000                  |
| H                                            | 6.10864900 | -3.53641600 | 3.16539100                  |

|    |             |             |             |
|----|-------------|-------------|-------------|
| H  | 8.34344900  | -1.21993000 | -0.65159900 |
| H  | 9.66511400  | -2.65382300 | 0.89630500  |
| C  | 4.49139600  | -0.63431000 | -0.21035600 |
| C  | 3.83740700  | -1.38520300 | 0.80395100  |
| N  | 5.78630300  | -0.73818600 | -0.44466500 |
| N  | 4.49704700  | -2.14758500 | 1.65563500  |
| P  | 3.44505900  | 0.58264200  | -1.09431100 |
| P  | 2.00527700  | -1.32896000 | 0.76490900  |
| C  | 4.06628800  | 0.50270300  | -2.80852400 |
| H  | 5.15910700  | 0.46594500  | -2.80389000 |
| H  | 3.73938900  | 1.37483300  | -3.38085500 |
| H  | 3.69215500  | -0.39983700 | -3.29866600 |
| C  | 1.54353200  | -1.25546900 | 2.52793600  |
| H  | 2.10446900  | -1.99272900 | 3.10828200  |
| H  | 0.47257700  | -1.44158700 | 2.65243500  |
| H  | 1.77138300  | -0.25757700 | 2.91098400  |
| C  | 1.57402700  | -3.10037800 | 0.23290000  |
| C  | 2.33278400  | -3.40149400 | -1.05948900 |
| C  | 0.07048900  | -3.17700600 | -0.03067000 |
| C  | 1.94677200  | -4.11285900 | 1.31343400  |
| H  | 3.41559400  | -3.45784300 | -0.90081700 |
| H  | 2.13938400  | -2.64117900 | -1.82791300 |
| H  | 2.00880500  | -4.36963600 | -1.45820100 |
| H  | -0.52401500 | -2.80375800 | 0.81267500  |
| H  | -0.21528700 | -4.22330200 | -0.19363300 |
| H  | -0.21188200 | -2.61905900 | -0.92964600 |
| H  | 1.75518900  | -5.12297100 | 0.93175500  |
| H  | 1.34332300  | -3.98531100 | 2.21753100  |
| H  | 3.00149400  | -4.05475000 | 1.59628700  |
| C  | 4.10449400  | 2.23532200  | -0.43864600 |
| C  | 5.55410100  | 2.47626900  | -0.85037600 |
| C  | 3.97943400  | 2.21475700  | 1.08411900  |
| C  | 3.21729700  | 3.33589600  | -1.01324500 |
| H  | 5.65832000  | 2.59354800  | -1.93353700 |
| H  | 6.22355200  | 1.67345600  | -0.52912100 |
| H  | 5.90117900  | 3.40785000  | -0.38705100 |
| H  | 2.96057900  | 1.95862700  | 1.40372400  |
| H  | 4.21292100  | 3.20741100  | 1.48663500  |
| H  | 4.67253600  | 1.50114100  | 1.54433100  |
| H  | 3.60087000  | 4.31635900  | -0.70634900 |
| H  | 2.19785800  | 3.24846900  | -0.63464500 |
| H  | 3.18368300  | 3.32145700  | -2.10966400 |
| Co | 1.36447600  | 0.21120300  | -0.64571500 |
| C  | -6.80017800 | 2.56641800  | 2.29797700  |

|   |             |             |             |
|---|-------------|-------------|-------------|
| C | -5.79176900 | 1.90377200  | 1.60657100  |
| C | -4.51964400 | 2.48660200  | 1.45108900  |
| C | -4.30403900 | 3.74830900  | 2.03937900  |
| C | -5.31359300 | 4.41011500  | 2.72601600  |
| C | -6.57136100 | 3.82253600  | 2.85615100  |
| H | -7.77224800 | 2.09279000  | 2.40621600  |
| H | -6.00011600 | 0.91572700  | 1.21060200  |
| H | -3.32211000 | 4.20971800  | 1.94203700  |
| H | -5.11881600 | 5.38536800  | 3.16407900  |
| H | -7.36378300 | 4.33535900  | 3.39369900  |
| C | -3.40144000 | 1.87806300  | 0.73938100  |
| C | -3.37346100 | 0.81487200  | -0.08646200 |
| C | -4.54309200 | -0.02740500 | -0.51663100 |
| H | -4.88183000 | -0.67989700 | 0.30927500  |
| H | -5.40551300 | 0.55731000  | -0.85125900 |
| N | -4.00068200 | -0.81965000 | -1.63566400 |
| C | -2.58681000 | -1.05787500 | -1.34132200 |
| H | -2.05078200 | -1.37283300 | -2.23947800 |
| H | -2.45746600 | -1.82774600 | -0.55928700 |
| C | -2.14043100 | 0.29950100  | -0.80672800 |
| C | -0.84699900 | 0.15579800  | 0.01379600  |
| H | -1.95315300 | 0.94666700  | -1.67440800 |
| H | -0.22113400 | -0.52708400 | -0.65232100 |
| H | -1.03098700 | -0.46283500 | 0.89844600  |
| S | -4.90513700 | -2.14372400 | -2.13920300 |
| O | -4.13272300 | -2.76198700 | -3.21282300 |
| O | -6.25734900 | -1.63865900 | -2.35607500 |
| C | -4.94283200 | -3.25969400 | -0.76272100 |
| C | -3.92602000 | -4.20221700 | -0.60560600 |
| C | -5.95222200 | -3.12904900 | 0.19423200  |
| C | -3.93196700 | -5.02381700 | 0.51668100  |
| H | -3.15604500 | -4.30055100 | -1.36601400 |
| C | -5.94069200 | -3.95726100 | 1.30851700  |
| H | -6.74404600 | -2.39961900 | 0.05040800  |
| C | -4.93329400 | -4.91493500 | 1.48925200  |
| H | -3.14827500 | -5.76756400 | 0.64060400  |
| H | -6.72908700 | -3.86531000 | 2.05175900  |
| C | -4.94603200 | -5.81430500 | 2.68348600  |
| H | -5.12017900 | -5.25395300 | 3.60710500  |
| H | -4.00702100 | -6.36332000 | 2.78693100  |
| H | -5.75231100 | -6.55282600 | 2.61118200  |
| C | -0.02319200 | 3.71614800  | 0.43566900  |
| C | 0.07653300  | 3.27860100  | 1.78293200  |
| C | 0.26976300  | 4.23240700  | 2.79538000  |

|   |             |            |             |
|---|-------------|------------|-------------|
| C | 0.37708600  | 5.57052500 | 2.44502600  |
| C | 0.31570700  | 5.97409100 | 1.10202300  |
| C | 0.12465200  | 5.05320200 | 0.07641500  |
| C | -0.20098200 | 1.43107800 | 0.47457400  |
| C | -0.05750200 | 1.86115100 | 1.78217700  |
| H | 0.33734400  | 3.92085200 | 3.83418800  |
| H | 0.52029400  | 6.31894900 | 3.21895000  |
| H | 0.41816200  | 7.02635100 | 0.85333100  |
| H | 0.09879300  | 5.37650000 | -0.95891800 |
| H | -2.46100700 | 2.40210200 | 0.89379300  |
| H | -0.12885400 | 1.21808000 | 2.64968700  |
| N | -0.21380100 | 2.58295300 | -0.35679100 |
| C | -0.03051300 | 2.46857300 | -1.73344100 |
| C | -0.57268600 | 3.35686900 | -2.65990500 |
| N | 0.68205500  | 1.37794000 | -2.10082900 |
| C | -0.37131900 | 3.10371900 | -4.00930200 |
| H | -1.17132600 | 4.19496400 | -2.32196300 |
| C | 0.82449200  | 1.11992900 | -3.41559300 |
| C | 0.32728400  | 1.96038200 | -4.39688500 |
| H | -0.78312400 | 3.77826300 | -4.75298400 |
| H | 1.37943600  | 0.21760300 | -3.65738900 |
| H | 0.48109800  | 1.71799800 | -5.44208300 |

#### M4S

|                                              |             |             |                             |
|----------------------------------------------|-------------|-------------|-----------------------------|
| Zero-point correction=                       |             |             | 0.975083 (Hartree/Particle) |
| Thermal correction to Energy=                |             |             | 1.033255                    |
| Thermal correction to Enthalpy=              |             |             | 1.034199                    |
| Thermal correction to Gibbs Free Energy=     |             |             | 0.885844                    |
| Sum of electronic and zero-point Energies=   |             |             | -3589.345840                |
| Sum of electronic and thermal Energies=      |             |             | -3589.287668                |
| Sum of electronic and thermal Enthalpies=    |             |             | -3589.286724                |
| Sum of electronic and thermal Free Energies= |             |             | -3589.435078                |
| C                                            | -3.88481500 | -6.86808300 | 0.69821800                  |
| C                                            | -2.73132000 | -6.11587300 | 0.69079300                  |
| C                                            | -2.79425400 | -4.73330200 | 0.41434300                  |
| C                                            | -4.06391300 | -4.12451800 | 0.14887400                  |
| C                                            | -5.22843400 | -4.92278900 | 0.16069700                  |
| C                                            | -5.13610200 | -6.26961000 | 0.43215000                  |
| H                                            | -3.83660500 | -7.93187800 | 0.91130300                  |
| H                                            | -1.75841700 | -6.55717600 | 0.88809400                  |
| H                                            | -6.18241000 | -4.44404700 | -0.04189600                 |
| H                                            | -6.03326500 | -6.88122500 | 0.44470200                  |
| C                                            | -3.03744600 | -2.10686100 | -0.11713300                 |
| C                                            | -1.77252600 | -2.72180700 | 0.10034300                  |

|    |             |             |             |
|----|-------------|-------------|-------------|
| N  | -4.17035700 | -2.78536700 | -0.09287500 |
| N  | -1.64198400 | -4.00191500 | 0.39054100  |
| P  | -2.97793400 | -0.29068500 | -0.37083700 |
| P  | -0.31962700 | -1.63192700 | -0.13724600 |
| C  | -4.39784400 | 0.05221600  | -1.46102700 |
| H  | -5.29380400 | -0.46442900 | -1.10860100 |
| H  | -4.59317100 | 1.12822500  | -1.49832900 |
| H  | -4.17438800 | -0.29417000 | -2.47341600 |
| C  | 0.67201200  | -1.91767100 | 1.37163800  |
| H  | 0.80590300  | -2.98910200 | 1.54634000  |
| H  | 1.65278100  | -1.44000800 | 1.27584000  |
| H  | 0.16121500  | -1.48336700 | 2.23490300  |
| C  | 0.67788200  | -2.44307600 | -1.52066600 |
| C  | -0.27002400 | -2.83503400 | -2.65189000 |
| C  | 1.64349500  | -1.35944500 | -2.00526900 |
| C  | 1.44743200  | -3.67023100 | -1.04534700 |
| H  | -0.92999000 | -3.66081300 | -2.36660900 |
| H  | -0.89843800 | -1.99276800 | -2.96744100 |
| H  | 0.31133200  | -3.16311700 | -3.52151800 |
| H  | 2.32065100  | -1.03181900 | -1.20544600 |
| H  | 2.26357100  | -1.73932600 | -2.82675000 |
| H  | 1.10046400  | -0.47727200 | -2.37969700 |
| H  | 1.95449000  | -4.12947200 | -1.90285400 |
| H  | 2.21458100  | -3.41657700 | -0.30676800 |
| H  | 0.78267100  | -4.42263700 | -0.60976600 |
| C  | -3.49207700 | 0.39572200  | 1.31614500  |
| C  | -4.94450600 | 0.04933100  | 1.63100000  |
| C  | -2.56388200 | -0.19018500 | 2.37641800  |
| C  | -3.30331000 | 1.90993600  | 1.26458500  |
| H  | -5.64145500 | 0.53447100  | 0.94088200  |
| H  | -5.13160300 | -1.02911800 | 1.60303000  |
| H  | -5.18546300 | 0.40219200  | 2.64109500  |
| H  | -1.51535300 | 0.06231100  | 2.17183700  |
| H  | -2.81741500 | 0.23075800  | 3.35647600  |
| H  | -2.64999100 | -1.27981200 | 2.46017800  |
| H  | -3.61227600 | 2.36108500  | 2.21605800  |
| H  | -2.25020000 | 2.16811600  | 1.09554100  |
| H  | -3.90214900 | 2.37583600  | 0.47378600  |
| Co | -1.03430900 | 0.22446300  | -1.01124500 |
| C  | 1.97094100  | -0.71138800 | 5.30960100  |
| C  | 2.13214000  | -0.12607700 | 4.05764600  |
| C  | 1.17194400  | 0.77145700  | 3.55451700  |
| C  | 0.05150000  | 1.04938700  | 4.36016200  |
| C  | -0.10616200 | 0.46815200  | 5.61153700  |

|   |             |             |             |
|---|-------------|-------------|-------------|
| C | 0.85582900  | -0.41794200 | 6.09319600  |
| H | 2.72205800  | -1.40667600 | 5.67463200  |
| H | 2.99963300  | -0.39597600 | 3.46408100  |
| H | -0.70207500 | 1.73902400  | 3.98207300  |
| H | -0.98144600 | 0.70535700  | 6.21042600  |
| H | 0.73705800  | -0.87922000 | 7.06949900  |
| C | 1.23306500  | 1.43245400  | 2.25552500  |
| C | 2.26204400  | 1.58704100  | 1.40107700  |
| C | 3.64850700  | 1.02533900  | 1.53063600  |
| H | 3.62736900  | -0.07552800 | 1.41188200  |
| H | 4.13522500  | 1.24099800  | 2.48746500  |
| N | 4.38003500  | 1.66991600  | 0.42815100  |
| C | 3.42513200  | 1.92313700  | -0.65551000 |
| H | 3.82000600  | 2.67054400  | -1.34577400 |
| H | 3.19510600  | 1.00404000  | -1.22399100 |
| C | 2.19751100  | 2.39531100  | 0.11735500  |
| C | 0.90186300  | 2.28256100  | -0.69067600 |
| H | 2.36117700  | 3.45269800  | 0.37035200  |
| H | 1.12017100  | 2.39418000  | -1.76187500 |
| H | 0.56765100  | 1.22608400  | -0.54842400 |
| S | 5.87409100  | 1.02793900  | 0.02351700  |
| O | 6.40675300  | 1.89366600  | -1.02373200 |
| O | 6.57102200  | 0.83213000  | 1.29133100  |
| C | 5.56846600  | -0.56760400 | -0.69142800 |
| C | 5.43466300  | -0.68724600 | -2.07654300 |
| C | 5.43189600  | -1.68210400 | 0.13873100  |
| C | 5.18283100  | -1.93707100 | -2.62719600 |
| H | 5.55150700  | 0.18732400  | -2.70982000 |
| C | 5.16657500  | -2.92286100 | -0.43057300 |
| H | 5.56172600  | -1.58078500 | 1.21248800  |
| C | 5.04462200  | -3.07283400 | -1.81759000 |
| H | 5.09192400  | -2.03790200 | -3.70630700 |
| H | 5.06541200  | -3.79577800 | 0.21025000  |
| C | 4.79575800  | -4.41472800 | -2.42830900 |
| H | 4.42096900  | -5.13231300 | -1.69410500 |
| H | 4.07795900  | -4.35574200 | -3.25254400 |
| H | 5.71948300  | -4.83000800 | -2.84751100 |
| C | -2.05857100 | 4.48666100  | -0.51015100 |
| C | -1.38291400 | 4.91246900  | 0.65728900  |
| C | -1.96763200 | 5.89937300  | 1.46278400  |
| C | -3.19759300 | 6.42344700  | 1.09145700  |
| C | -3.85824900 | 5.97383900  | -0.06332900 |
| C | -3.30194900 | 4.99599700  | -0.88057000 |
| C | -0.15579100 | 3.25488100  | -0.29470900 |

|   |             |             |             |
|---|-------------|-------------|-------------|
| C | -0.18995200 | 4.13259200  | 0.75746100  |
| H | -1.46706200 | 6.23813800  | 2.36588200  |
| H | -3.66342300 | 7.18895200  | 1.70552500  |
| H | -4.82541900 | 6.39356800  | -0.32454500 |
| H | -3.82568300 | 4.64105300  | -1.76389100 |
| H | 0.29699100  | 1.91855500  | 1.97495900  |
| H | 0.56694900  | 4.21140500  | 1.52656100  |
| N | -1.30049500 | 3.46309600  | -1.08123600 |
| C | -1.58667900 | 2.87027400  | -2.31727500 |
| C | -1.91691100 | 3.66444500  | -3.41663900 |
| N | -1.54519000 | 1.52238100  | -2.39219200 |
| C | -2.19861500 | 3.05822800  | -4.63019800 |
| H | -1.92145800 | 4.74323600  | -3.30640200 |
| C | -1.80219900 | 0.94784900  | -3.59023700 |
| C | -2.12833500 | 1.66907300  | -4.72342200 |
| H | -2.45350400 | 3.66169000  | -5.49523900 |
| H | -1.76356700 | -0.13858400 | -3.59455700 |
| H | -2.33260000 | 1.14831800  | -5.65194200 |

#### TS2R'

|                                              |             |            |                             |
|----------------------------------------------|-------------|------------|-----------------------------|
| Zero-point correction=                       |             |            | 0.972636 (Hartree/Particle) |
| Thermal correction to Energy=                |             |            | 1.029903                    |
| Thermal correction to Enthalpy=              |             |            | 1.030848                    |
| Thermal correction to Gibbs Free Energy=     |             |            | 0.885771                    |
| Sum of electronic and zero-point Energies=   |             |            | -3589.256571                |
| Sum of electronic and thermal Energies=      |             |            | -3589.199303                |
| Sum of electronic and thermal Enthalpies=    |             |            | -3589.198359                |
| Sum of electronic and thermal Free Energies= |             |            | -3589.343435                |
| Imaginary frequency=-395.42 cm <sup>-1</sup> |             |            |                             |
| C                                            | -5.11253000 | 4.97907400 | -0.58739100                 |
| C                                            | -4.68236400 | 3.85456500 | 0.07729800                  |
| C                                            | -3.31172500 | 3.51253700 | 0.05781500                  |
| C                                            | -2.38559400 | 4.34681800 | -0.64498600                 |
| C                                            | -2.85726700 | 5.49419900 | -1.32086600                 |
| C                                            | -4.19841100 | 5.79900500 | -1.28981400                 |
| H                                            | -6.16541000 | 5.24393800 | -0.57869700                 |
| H                                            | -5.36888000 | 3.20881300 | 0.61780200                  |
| H                                            | -2.13985800 | 6.11180100 | -1.85389200                 |
| H                                            | -4.56501700 | 6.67938000 | -1.80941600                 |
| C                                            | -0.67874000 | 2.94207300 | -0.06183600                 |
| C                                            | -1.60413200 | 2.09636800 | 0.62735800                  |
| N                                            | -1.06010100 | 4.04478700 | -0.67547900                 |
| N                                            | -2.89107800 | 2.38347200 | 0.68765800                  |
| P                                            | 1.09619800  | 2.46721600 | -0.01589600                 |

|    |             |             |             |
|----|-------------|-------------|-------------|
| P  | -1.01954800 | 0.49687200  | 1.35250000  |
| C  | 1.55659100  | 3.43858500  | 1.46775800  |
| H  | 1.32620900  | 4.49430600  | 1.30583900  |
| H  | 2.61591800  | 3.32831700  | 1.71282500  |
| H  | 0.95715500  | 3.09688900  | 2.31423300  |
| C  | -2.24399200 | -0.65787100 | 0.63395700  |
| H  | -3.23931700 | -0.21148300 | 0.69754700  |
| H  | -2.23504900 | -1.59622600 | 1.19752500  |
| H  | -2.01456700 | -0.88693200 | -0.40420600 |
| C  | -1.64213500 | 0.54358200  | 3.16446900  |
| C  | -1.35077800 | 1.89540300  | 3.81344300  |
| C  | -0.93528700 | -0.60280100 | 3.89066500  |
| C  | -3.15332100 | 0.31053400  | 3.25345600  |
| H  | -1.93812000 | 2.69445700  | 3.34954900  |
| H  | -0.30075600 | 2.19668300  | 3.77915000  |
| H  | -1.63456000 | 1.85246800  | 4.87107600  |
| H  | -1.17514000 | -1.57120000 | 3.43301300  |
| H  | -1.27743200 | -0.64425800 | 4.93138600  |
| H  | 0.15362300  | -0.49647300 | 3.90323900  |
| H  | -3.45405900 | 0.41855400  | 4.30290200  |
| H  | -3.44127000 | -0.69588500 | 2.93620300  |
| H  | -3.71632500 | 1.04006900  | 2.66516900  |
| C  | 2.00839400  | 3.35875700  | -1.41869700 |
| C  | 1.25143800  | 3.23074900  | -2.73701500 |
| C  | 3.37401600  | 2.67618300  | -1.54033500 |
| C  | 2.21202900  | 4.84162800  | -1.10441400 |
| H  | 0.30783100  | 3.78199100  | -2.71576700 |
| H  | 1.04411400  | 2.19208400  | -2.99768700 |
| H  | 1.87107200  | 3.65503800  | -3.53614700 |
| H  | 3.93184000  | 2.67807500  | -0.59591600 |
| H  | 3.98052100  | 3.21620300  | -2.27623700 |
| H  | 3.28764600  | 1.64018900  | -1.88965000 |
| H  | 2.68827000  | 5.31241500  | -1.97249200 |
| H  | 2.86986300  | 5.00374600  | -0.24589900 |
| H  | 1.26406400  | 5.35713900  | -0.92523400 |
| Co | 1.24210900  | 0.21189000  | 0.39868500  |
| C  | -1.92572700 | 1.44665000  | -3.59488300 |
| C  | -1.45622800 | 0.88261500  | -2.41118300 |
| C  | -0.29484000 | 0.09331800  | -2.38920300 |
| C  | 0.35666900  | -0.12678600 | -3.62076200 |
| C  | -0.10961700 | 0.43622300  | -4.80332400 |
| C  | -1.25040800 | 1.23771900  | -4.79463200 |
| H  | -2.83175300 | 2.04790000  | -3.57569700 |
| H  | -2.02904300 | 1.03401600  | -1.50416800 |



|   |             |             |             |
|---|-------------|-------------|-------------|
| H | 1.25283700  | -0.74442300 | -3.62865600 |
| H | 0.41975700  | 0.24900400  | -5.73405600 |
| H | -1.61685300 | 1.68209900  | -5.71570500 |
| C | 0.28443900  | -0.56719000 | -1.19998000 |
| C | 0.27472300  | -1.91615500 | -1.18987900 |
| C | -0.63442600 | -2.84048000 | -1.95990900 |
| H | -1.62354800 | -2.38682700 | -2.12435200 |
| H | -0.25109200 | -3.15222300 | -2.93943000 |
| N | -0.70107900 | -4.03160900 | -1.06844900 |
| C | -0.03896500 | -3.76392700 | 0.22478800  |
| H | 0.35275500  | -4.69457800 | 0.64055700  |
| H | -0.73188600 | -3.31011700 | 0.95568200  |
| C | 1.02082100  | -2.75886100 | -0.20628300 |
| C | 1.67587900  | -1.89482700 | 0.82497100  |
| H | 1.79369700  | -3.32035100 | -0.75657800 |
| H | 2.50070300  | -2.35587900 | 1.36851800  |
| H | 0.95281600  | -1.57708900 | 1.58743000  |
| S | -2.09118200 | -4.94784600 | -1.04510300 |
| O | -1.77757900 | -6.12593100 | -0.23972900 |
| O | -2.52615400 | -5.05830100 | -2.43513000 |
| C | -3.31218500 | -4.00912500 | -0.15988100 |
| C | -3.38606900 | -4.10911600 | 1.23055800  |
| C | -4.15001100 | -3.13550100 | -0.85716800 |
| C | -4.30463300 | -3.32443500 | 1.92142400  |
| H | -2.74284900 | -4.80721200 | 1.75874400  |
| C | -5.06260000 | -2.36314600 | -0.15116000 |
| H | -4.09529600 | -3.08056100 | -1.94049700 |
| C | -5.15317700 | -2.43958600 | 1.24575200  |
| H | -4.36808500 | -3.40062700 | 3.00477700  |
| H | -5.72002900 | -1.68491400 | -0.69081000 |
| C | -6.13480500 | -1.58859300 | 1.98687300  |
| H | -5.99895200 | -1.65755000 | 3.06907200  |
| H | -7.16530900 | -1.88473500 | 1.76155600  |
| H | -6.04694900 | -0.53519200 | 1.69844000  |
| C | 5.21090100  | -1.00522700 | 0.03821700  |
| C | 4.82804100  | -1.61262100 | -1.19313700 |
| C | 5.81845600  | -2.14762600 | -2.03481600 |
| C | 7.14716700  | -2.06312100 | -1.64869700 |
| C | 7.50711300  | -1.43628500 | -0.44776700 |
| C | 6.54779000  | -0.89556700 | 0.40834100  |
| C | 2.91127300  | -0.82958600 | -0.19542200 |
| C | 3.42787200  | -1.49687100 | -1.33224800 |
| H | 5.53703500  | -2.61267900 | -2.97543100 |
| H | 7.92166900  | -2.47416600 | -2.28992800 |

|   |            |             |             |
|---|------------|-------------|-------------|
| H | 8.55518000 | -1.35792800 | -0.17489400 |
| H | 6.86691700 | -0.38030000 | 1.30547400  |
| H | 2.46030300 | 0.18352500  | -0.61831700 |
| H | 2.83189500 | -1.78611800 | -2.18624400 |
| N | 4.04044300 | -0.53150300 | 0.63896300  |
| C | 3.80120100 | 0.00670300  | 1.88296800  |
| C | 4.72710000 | -0.00188500 | 2.93410100  |
| N | 2.54148700 | 0.49017600  | 2.03331700  |
| C | 4.35341100 | 0.51767500  | 4.15952300  |
| H | 5.70069000 | -0.45094400 | 2.80290400  |
| C | 2.20535100 | 0.96952700  | 3.24401900  |
| C | 3.06430200 | 1.02146500  | 4.32406400  |
| H | 5.05768100 | 0.50815700  | 4.98565400  |
| H | 1.18918600 | 1.32393000  | 3.32950600  |
| H | 2.72045300 | 1.42686300  | 5.26835700  |

### TS2S'

|                                              |            |             |                             |
|----------------------------------------------|------------|-------------|-----------------------------|
| Zero-point correction=                       |            |             | 0.974358 (Hartree/Particle) |
| Thermal correction to Energy=                |            |             | 1.031078                    |
| Thermal correction to Enthalpy=              |            |             | 1.032022                    |
| Thermal correction to Gibbs Free Energy=     |            |             | 0.888506                    |
| Sum of electronic and zero-point Energies=   |            |             | -3589.255372                |
| Sum of electronic and thermal Energies=      |            |             | -3589.198652                |
| Sum of electronic and thermal Enthalpies=    |            |             | -3589.197708                |
| Sum of electronic and thermal Free Energies= |            |             | -3589.341224                |
| Imaginary frequency=-369.52 cm <sup>-1</sup> |            |             |                             |
| C                                            | 7.08504600 | -1.97842900 | -0.62471300                 |
| C                                            | 6.15626100 | -1.13354000 | -0.06376000                 |
| C                                            | 4.79089400 | -1.49781000 | -0.06084200                 |
| C                                            | 4.39092000 | -2.73931500 | -0.65037300                 |
| C                                            | 5.36849200 | -3.58812500 | -1.21653700                 |
| C                                            | 6.69043700 | -3.20910800 | -1.20081200                 |
| H                                            | 8.13539700 | -1.70349900 | -0.62645100                 |
| H                                            | 6.43967600 | -0.18650000 | 0.38677200                  |
| H                                            | 5.04529100 | -4.52799400 | -1.65481200                 |
| H                                            | 7.44437200 | -3.85904500 | -1.63492100                 |
| C                                            | 2.21146500 | -2.27929900 | -0.13383000                 |
| C                                            | 2.61075500 | -1.05296600 | 0.48361900                  |
| N                                            | 3.08500800 | -3.11458400 | -0.66422800                 |
| N                                            | 3.87547100 | -0.67288000 | 0.51253900                  |
| P                                            | 0.42855600 | -2.72570900 | -0.09320900                 |
| P                                            | 1.34959800 | 0.04369600  | 1.27626000                  |
| C                                            | 0.50192300 | -3.95334100 | 1.26504000                  |
| H                                            | 1.18390200 | -4.76196100 | 0.99178700                  |

|    |             |             |             |
|----|-------------|-------------|-------------|
| H  | -0.48476800 | -4.37105200 | 1.47940500  |
| H  | 0.89289200  | -3.48484700 | 2.16875200  |
| C  | 1.88654800  | 1.68124300  | 0.64816100  |
| H  | 2.97440900  | 1.75150700  | 0.72418600  |
| H  | 1.43533600  | 2.47210300  | 1.25287600  |
| H  | 1.58856400  | 1.82471600  | -0.38895600 |
| C  | 1.94068200  | 0.18127700  | 3.09173300  |
| C  | 2.40834300  | -1.17413500 | 3.61831500  |
| C  | 0.74672400  | 0.72712000  | 3.87872100  |
| C  | 3.10673300  | 1.15851400  | 3.25311700  |
| H  | 3.36022400  | -1.46534800 | 3.16266400  |
| H  | 1.70429200  | -1.99140400 | 3.44343000  |
| H  | 2.56709200  | -1.11031500 | 4.70083400  |
| H  | 0.42958200  | 1.70419800  | 3.49082400  |
| H  | 1.02977300  | 0.87330800  | 4.92794100  |
| H  | -0.12301200 | 0.06338500  | 3.85812700  |
| H  | 3.43287400  | 1.13146300  | 4.30005100  |
| H  | 2.82005100  | 2.18963300  | 3.02963500  |
| H  | 3.96447800  | 0.88931200  | 2.62942400  |
| C  | -0.00555800 | -3.80495400 | -1.61451200 |
| C  | 0.88120300  | -3.49545900 | -2.81696400 |
| C  | -1.46338800 | -3.47733200 | -1.94401200 |
| C  | 0.11716900  | -5.29593600 | -1.30211000 |
| H  | 1.89478800  | -3.87696200 | -2.67666600 |
| H  | 0.94654500  | -2.43042600 | -3.02746600 |
| H  | 0.45156400  | -3.98331900 | -3.70049900 |
| H  | -2.13114400 | -3.63912200 | -1.08786600 |
| H  | -1.80955900 | -4.12668700 | -2.75626500 |
| H  | -1.57621100 | -2.44075200 | -2.28120600 |
| H  | -0.15892600 | -5.85508500 | -2.20367900 |
| H  | -0.54788200 | -5.62376400 | -0.49828600 |
| H  | 1.14246400  | -5.57791000 | -1.04481000 |
| Co | -0.72936800 | -0.81905800 | 0.46291100  |
| C  | 2.29014800  | -0.28823900 | -3.82936100 |
| C  | 1.71369600  | -0.02082500 | -2.59038800 |
| C  | 0.31866700  | -0.04265200 | -2.41705400 |
| C  | -0.47480200 | -0.32830600 | -3.54380400 |
| C  | 0.10090400  | -0.59143100 | -4.78339800 |
| C  | 1.48728900  | -0.57867100 | -4.93086800 |
| H  | 3.37208700  | -0.26361200 | -3.93339800 |
| H  | 2.35781100  | 0.22888000  | -1.75143700 |
| H  | -1.55819900 | -0.33328200 | -3.43629800 |
| H  | -0.53553200 | -0.80782700 | -5.63745500 |
| H  | 1.93780000  | -0.78635000 | -5.89737100 |

|   |             |             |             |
|---|-------------|-------------|-------------|
| C | -0.31865400 | 0.31520600  | -1.13539500 |
| C | -0.84697800 | 1.53921800  | -0.99264500 |
| C | -0.90804200 | 2.66390500  | -1.99787200 |
| H | 0.07535000  | 3.10785600  | -2.20763700 |
| H | -1.31176000 | 2.33921700  | -2.96477600 |
| N | -1.81551600 | 3.66352800  | -1.38731600 |
| C | -2.50829500 | 3.04092200  | -0.24165200 |
| H | -3.43027800 | 2.56908800  | -0.60811600 |
| H | -2.79116700 | 3.80044200  | 0.49024400  |
| C | -1.52915200 | 1.98600800  | 0.26740500  |
| C | -2.08758000 | 0.82807800  | 1.05946700  |
| H | -0.77919500 | 2.49911100  | 0.89601400  |
| H | -3.13739800 | 0.95800100  | 1.32752400  |
| H | -1.56499800 | 0.67104600  | 2.00684900  |
| S | -1.20575000 | 5.21226200  | -1.19892700 |
| O | -2.24313600 | 5.96361100  | -0.49599600 |
| O | -0.73255800 | 5.60634500  | -2.52319600 |
| C | 0.22376900  | 5.14013200  | -0.13856700 |
| C | 0.06436400  | 5.17425100  | 1.24756700  |
| C | 1.49635300  | 5.04866500  | -0.70638600 |
| C | 1.19061600  | 5.12010900  | 2.06296000  |
| H | -0.92818700 | 5.26876500  | 1.67957800  |
| C | 2.60967900  | 4.99755100  | 0.12318100  |
| H | 1.60700600  | 5.04381700  | -1.78663500 |
| C | 2.47840500  | 5.03805000  | 1.51716600  |
| H | 1.07132500  | 5.15673200  | 3.14361600  |
| H | 3.60214500  | 4.93185400  | -0.31698700 |
| C | 3.68945400  | 5.00684100  | 2.39418900  |
| H | 3.43094800  | 4.82416100  | 3.44014500  |
| H | 4.22790600  | 5.96047200  | 2.35075200  |
| H | 4.39811600  | 4.23582300  | 2.07436300  |
| C | -4.85974800 | -1.44014500 | 0.21952900  |
| C | -4.82452000 | -0.63582900 | -0.95806700 |
| C | -5.99338800 | -0.48633700 | -1.72561900 |
| C | -7.14704100 | -1.14521300 | -1.33156400 |
| C | -7.15115600 | -1.96732400 | -0.19602400 |
| C | -6.01054200 | -2.13117100 | 0.58909400  |
| C | -2.71151500 | -0.62249800 | -0.06366100 |
| C | -3.50791100 | -0.16036000 | -1.13657100 |
| H | -5.97795200 | 0.12922700  | -2.62043000 |
| H | -8.05625100 | -1.03775400 | -1.91626300 |
| H | -8.05592900 | -2.50100400 | 0.07886000  |
| H | -6.04419900 | -2.80879300 | 1.43263700  |
| H | -1.87579500 | -1.32324000 | -0.52531900 |

|   |             |             |             |
|---|-------------|-------------|-------------|
| H | -3.13764200 | 0.43945700  | -1.95517700 |
| N | -3.56867400 | -1.42428900 | 0.75985800  |
| C | -3.06062100 | -1.91297800 | 1.94482800  |
| C | -3.85160600 | -2.42681000 | 2.98051200  |
| N | -1.71242200 | -1.79421400 | 2.05716800  |
| C | -3.23916800 | -2.84956100 | 4.14558400  |
| H | -4.92734000 | -2.44835500 | 2.88874100  |
| C | -1.15146700 | -2.19815000 | 3.21131900  |
| C | -1.85502400 | -2.74071000 | 4.26871300  |
| H | -3.84251600 | -3.24055900 | 4.95894700  |
| H | -0.08111300 | -2.06522800 | 3.26635300  |
| H | -1.33071500 | -3.04635000 | 5.16656200  |

### M3R'

|                                              |             |             |                             |
|----------------------------------------------|-------------|-------------|-----------------------------|
| Zero-point correction=                       |             |             | 0.974989 (Hartree/Particle) |
| Thermal correction to Energy=                |             |             | 1.032173                    |
| Thermal correction to Enthalpy=              |             |             | 1.033118                    |
| Thermal correction to Gibbs Free Energy=     |             |             | 0.888545                    |
| Sum of electronic and zero-point Energies=   |             |             | -3589.292739                |
| Sum of electronic and thermal Energies=      |             |             | -3589.235554                |
| Sum of electronic and thermal Enthalpies=    |             |             | -3589.234610                |
| Sum of electronic and thermal Free Energies= |             |             | -3589.379183                |
| C                                            | -3.77022300 | 6.14960800  | -0.52137200                 |
| C                                            | -3.66695700 | 4.91854900  | 0.08280300                  |
| C                                            | -2.43539800 | 4.22710000  | 0.05322600                  |
| C                                            | -1.31026100 | 4.81747600  | -0.60641000                 |
| C                                            | -1.44679000 | 6.08362500  | -1.21815300                 |
| C                                            | -2.65816000 | 6.73321800  | -1.17254500                 |
| H                                            | -4.71460500 | 6.68528800  | -0.50085100                 |
| H                                            | -4.50805000 | 4.45312900  | 0.58835300                  |
| H                                            | -0.58217700 | 6.51435100  | -1.71511600                 |
| H                                            | -2.76814000 | 7.70604900  | -1.64205700                 |
| C                                            | -0.05291700 | 2.98236300  | -0.08642500                 |
| C                                            | -1.16952000 | 2.39363300  | 0.58396900                  |
| N                                            | -0.11651500 | 4.16765500  | -0.65835600                 |
| N                                            | -2.33575500 | 3.00769100  | 0.64571500                  |
| P                                            | 1.53717100  | 2.05104400  | -0.10407900                 |
| P                                            | -1.00372000 | 0.70388100  | 1.31445800                  |
| C                                            | 2.38502600  | 2.87598200  | 1.29100900                  |
| H                                            | 2.43970800  | 3.94938700  | 1.09547200                  |
| H                                            | 3.39392200  | 2.47843600  | 1.43079500                  |
| H                                            | 1.81248700  | 2.73502300  | 2.20840700                  |
| C                                            | -2.41907500 | -0.17962100 | 0.56092000                  |
| H                                            | -3.29749000 | 0.47027700  | 0.53337600                  |

|    |             |             |             |
|----|-------------|-------------|-------------|
| H  | -2.64807800 | -1.06056800 | 1.16772700  |
| H  | -2.18215200 | -0.51838200 | -0.44626100 |
| C  | -1.65977400 | 0.91434500  | 3.09937800  |
| C  | -1.10469800 | 2.18736400  | 3.73945000  |
| C  | -1.24562600 | -0.34515800 | 3.86480100  |
| C  | -3.18788700 | 1.00783500  | 3.13641000  |
| H  | -1.55456500 | 3.07927600  | 3.29186000  |
| H  | -0.01943900 | 2.30146300  | 3.66682500  |
| H  | -1.35664900 | 2.19342000  | 4.80603000  |
| H  | -1.64249000 | -1.24960900 | 3.38518900  |
| H  | -1.65899300 | -0.30874700 | 4.87950600  |
| H  | -0.16202700 | -0.46305400 | 3.95314600  |
| H  | -3.49613500 | 1.20442100  | 4.17057500  |
| H  | -3.66611000 | 0.07395500  | 2.82700100  |
| H  | -3.56662400 | 1.82078800  | 2.51103800  |
| C  | 2.57357000  | 2.58305500  | -1.60744600 |
| C  | 1.73793400  | 2.70985100  | -2.87743400 |
| C  | 3.66858400  | 1.53285200  | -1.80342300 |
| C  | 3.23043500  | 3.94082000  | -1.33043400 |
| H  | 0.98217000  | 3.49505000  | -2.79286500 |
| H  | 1.25013400  | 1.77591100  | -3.15194900 |
| H  | 2.41170800  | 2.98267400  | -3.69799100 |
| H  | 4.22934600  | 1.33605200  | -0.88126000 |
| H  | 4.38080500  | 1.90470600  | -2.54883300 |
| H  | 3.26593300  | 0.58254000  | -2.16788100 |
| H  | 3.75166000  | 4.24794500  | -2.24406400 |
| H  | 3.97619400  | 3.89784800  | -0.53256100 |
| H  | 2.49599900  | 4.71550600  | -1.09169700 |
| Co | 1.10370300  | -0.01152600 | 0.39942700  |
| C  | -1.66213900 | 1.64785700  | -3.59681400 |
| C  | -1.26694700 | 1.04298200  | -2.40681400 |
| C  | -0.32115800 | 0.00443200  | -2.39258200 |
| C  | 0.18783000  | -0.41516600 | -3.63987300 |
| C  | -0.20499700 | 0.18693400  | -4.82986200 |
| C  | -1.12826900 | 1.23099700  | -4.81388100 |
| H  | -2.39835900 | 2.44782200  | -3.56841400 |
| H  | -1.72928900 | 1.37631400  | -1.48630700 |
| H  | 0.92206000  | -1.21858600 | -3.65377500 |
| H  | 0.21342200  | -0.15854000 | -5.77144300 |
| H  | -1.43430600 | 1.70914200  | -5.74022900 |
| C  | 0.18289600  | -0.70184800 | -1.19277900 |
| C  | -0.00222100 | -2.04758400 | -1.19157500 |
| C  | -1.10205700 | -2.73102800 | -1.98846900 |
| H  | -1.95988400 | -2.06240200 | -2.14874500 |

|   |             |             |             |
|---|-------------|-------------|-------------|
| H | -0.78715200 | -3.10196500 | -2.97193000 |
| N | -1.45603300 | -3.89381900 | -1.13004300 |
| C | -0.73178300 | -3.83814300 | 0.14616600  |
| H | -0.57124600 | -4.84668600 | 0.53487300  |
| H | -1.26539400 | -3.24265000 | 0.91035700  |
| C | 0.54032800  | -3.13178000 | -0.29809100 |
| C | 1.50593300  | -2.72736300 | 0.79161900  |
| H | 1.05318900  | -3.85486700 | -0.95086800 |
| H | 1.57955100  | -3.52431400 | 1.54691100  |
| H | 1.07332100  | -1.89297500 | 1.37600100  |
| S | -3.00997900 | -4.48261100 | -1.14128800 |
| O | -2.96602800 | -5.73363100 | -0.38735400 |
| O | -3.44530700 | -4.43689800 | -2.53460400 |
| C | -4.01834400 | -3.34857100 | -0.21666300 |
| C | -4.08746500 | -3.46398500 | 1.17310700  |
| C | -4.71723800 | -2.34092000 | -0.88459700 |
| C | -4.86617700 | -2.56207500 | 1.89204300  |
| H | -3.55714400 | -4.26629400 | 1.67818500  |
| C | -5.49665500 | -1.45578800 | -0.15133100 |
| H | -4.66709100 | -2.27342500 | -1.96738400 |
| C | -5.58419300 | -1.54899200 | 1.24466800  |
| H | -4.92746200 | -2.64972900 | 2.97472000  |
| H | -6.05082400 | -0.67562600 | -0.66842300 |
| C | -6.43172000 | -0.58798800 | 2.01568800  |
| H | -6.28366400 | -0.69021200 | 3.09354400  |
| H | -7.49606200 | -0.74870100 | 1.81046800  |
| H | -6.21509600 | 0.44901000  | 1.73760900  |
| C | 4.98804600  | -1.59890600 | 0.24066300  |
| C | 4.81124300  | -2.39275800 | -0.91843500 |
| C | 5.86322000  | -2.49295400 | -1.83937200 |
| C | 7.04106300  | -1.80177000 | -1.59070000 |
| C | 7.18661000  | -1.00668200 | -0.44269200 |
| C | 6.16128700  | -0.89029900 | 0.49011100  |
| C | 2.87044700  | -2.43161200 | 0.25350400  |
| C | 3.47989400  | -2.91177000 | -0.87497800 |
| H | 5.75054700  | -3.09497900 | -2.73724900 |
| H | 7.86318000  | -1.87042200 | -2.29763200 |
| H | 8.11624300  | -0.46973300 | -0.27678100 |
| H | 6.27708500  | -0.26490900 | 1.37064000  |
| H | 2.26953100  | -0.22342300 | -0.44800900 |
| H | 3.02873200  | -3.57310700 | -1.60190700 |
| N | 3.78910200  | -1.63986100 | 0.95429700  |
| C | 3.51944600  | -0.89086600 | 2.10227000  |
| C | 4.40726200  | -0.93765200 | 3.17919800  |

|   |            |             |            |
|---|------------|-------------|------------|
| N | 2.38677600 | -0.15161400 | 2.12064000 |
| C | 4.11961300 | -0.21567700 | 4.32613300 |
| H | 5.28865900 | -1.56549900 | 3.10919300 |
| C | 2.10742500 | 0.49487500  | 3.26782400 |
| C | 2.93145700 | 0.50770600  | 4.37835500 |
| H | 4.79613400 | -0.24365600 | 5.17445400 |
| H | 1.17552500 | 1.04210900  | 3.26072600 |
| H | 2.63962900 | 1.06915500  | 5.25877700 |

### M3S'

|                                              |             |             |                             |
|----------------------------------------------|-------------|-------------|-----------------------------|
| Zero-point correction=                       |             |             | 0.975146 (Hartree/Particle) |
| Thermal correction to Energy=                |             |             | 1.032054                    |
| Thermal correction to Enthalpy=              |             |             | 1.032998                    |
| Thermal correction to Gibbs Free Energy=     |             |             | 0.889539                    |
| Sum of electronic and zero-point Energies=   |             |             | -3589.277502                |
| Sum of electronic and thermal Energies=      |             |             | -3589.220595                |
| Sum of electronic and thermal Enthalpies=    |             |             | -3589.219650                |
| Sum of electronic and thermal Free Energies= |             |             | -3589.363109                |
| C                                            | 1.77156000  | -7.08416000 | -1.19392200                 |
| C                                            | 2.10375700  | -5.94120300 | -0.50401100                 |
| C                                            | 1.14371200  | -4.91745500 | -0.34279700                 |
| C                                            | -0.16248000 | -5.08229800 | -0.90194500                 |
| C                                            | -0.47697000 | -6.26884000 | -1.60094100                 |
| C                                            | 0.47862500  | -7.24822300 | -1.74385700                 |
| H                                            | 2.50746300  | -7.87250400 | -1.32064600                 |
| H                                            | 3.09058700  | -5.79745300 | -0.07348000                 |
| H                                            | -1.47414800 | -6.37437600 | -2.01874700                 |
| H                                            | 0.24277100  | -8.15901600 | -2.28620300                 |
| C                                            | -0.73991600 | -2.99954800 | -0.15664300                 |
| C                                            | 0.55000900  | -2.84797600 | 0.44411400                  |
| N                                            | -1.09733400 | -4.10283200 | -0.78281400                 |
| N                                            | 1.47062100  | -3.78922700 | 0.34237900                  |
| P                                            | -1.95648000 | -1.62331200 | -0.00066400                 |
| P                                            | 0.93516800  | -1.30087500 | 1.38389600                  |
| C                                            | -2.96396200 | -2.30317100 | 1.36924400                  |
| H                                            | -3.35995600 | -3.27965300 | 1.07827300                  |
| H                                            | -3.79206600 | -1.64001700 | 1.63056300                  |
| H                                            | -2.33117500 | -2.44594900 | 2.24765600                  |
| C                                            | 2.59292300  | -0.84700800 | 0.74987200                  |
| H                                            | 3.20650400  | -1.73957100 | 0.59537400                  |
| H                                            | 3.08307900  | -0.20480100 | 1.48717400                  |
| H                                            | 2.51211900  | -0.28849900 | -0.18321800                 |
| C                                            | 1.41395400  | -1.94118900 | 3.11930900                  |
| C                                            | 0.37507900  | -2.94067200 | 3.62266000                  |



|    |             |             |             |
|----|-------------|-------------|-------------|
| C  | 1.48878900  | -0.70400400 | 4.01701700  |
| C  | 2.77520600  | -2.63926800 | 3.12991300  |
| H  | 0.39080700  | -3.86380000 | 3.03346100  |
| H  | -0.64954000 | -2.55913500 | 3.60628500  |
| H  | 0.60113400  | -3.21028100 | 4.66070000  |
| H  | 2.23393300  | 0.01292600  | 3.64855600  |
| H  | 1.79269300  | -0.99552800 | 5.02928700  |
| H  | 0.53335900  | -0.17498700 | 4.09488200  |
| H  | 2.94453400  | -3.05345200 | 4.13146800  |
| H  | 3.59886800  | -1.95146600 | 2.92230600  |
| H  | 2.82114300  | -3.46296000 | 2.41263300  |
| C  | -3.14005700 | -1.64339800 | -1.50046800 |
| C  | -2.49874500 | -2.26768500 | -2.74075200 |
| C  | -3.48598800 | -0.17474700 | -1.75378000 |
| C  | -4.42533700 | -2.40932200 | -1.18645400 |
| H  | -2.53306900 | -3.35783900 | -2.69549300 |
| H  | -1.45921300 | -1.97551300 | -2.88480900 |
| H  | -3.06099500 | -1.94413600 | -3.62493800 |
| H  | -3.95162000 | 0.29010800  | -0.87544500 |
| H  | -4.20123100 | -0.10055700 | -2.58159800 |
| H  | -2.60093600 | 0.41215200  | -2.01881400 |
| H  | -5.07238900 | -2.36676800 | -2.07047500 |
| H  | -4.98477500 | -1.97820400 | -0.35124000 |
| H  | -4.23396000 | -3.46499300 | -0.97250500 |
| Co | -0.78591200 | 0.10531200  | 0.65200900  |
| C  | 1.15971900  | -2.05796200 | -3.67623200 |
| C  | 1.08851100  | -1.41845300 | -2.44015000 |
| C  | 0.33740800  | -0.24423600 | -2.26975300 |
| C  | -0.30840900 | 0.28206400  | -3.40622700 |
| C  | -0.22636900 | -0.34630200 | -4.64374100 |
| C  | 0.49954200  | -1.52860500 | -4.78287200 |
| H  | 1.74511000  | -2.96954700 | -3.77259400 |
| H  | 1.64971700  | -1.82735000 | -1.60573500 |
| H  | -0.87881700 | 1.20390000  | -3.30156300 |
| H  | -0.73636800 | 0.08563000  | -5.50107900 |
| H  | 0.55770500  | -2.02681900 | -5.74657500 |
| C  | 0.24720500  | 0.49167900  | -0.99050200 |
| C  | 0.83765400  | 1.70447100  | -0.92797200 |
| C  | 1.69553000  | 2.31352800  | -2.02805900 |
| H  | 2.58902600  | 1.71505600  | -2.25228000 |
| H  | 1.14874800  | 2.41302600  | -2.97315200 |
| N  | 2.07482200  | 3.65338900  | -1.54358600 |
| C  | 1.18835900  | 4.01145700  | -0.43037700 |
| H  | 0.30207600  | 4.51568200  | -0.83991700 |

|   |             |             |             |
|---|-------------|-------------|-------------|
| H | 1.67980700  | 4.71597500  | 0.24401400  |
| C | 0.79804900  | 2.68487800  | 0.22430100  |
| C | -0.51481800 | 2.74846800  | 1.00815900  |
| H | 1.59325400  | 2.41834800  | 0.94177600  |
| H | -0.65152300 | 3.75510200  | 1.41873500  |
| H | -0.43420800 | 2.09928400  | 1.88797700  |
| S | 3.70963100  | 3.99079100  | -1.41033900 |
| O | 3.78898400  | 5.32865500  | -0.82880400 |
| O | 4.27959800  | 3.68523300  | -2.71959400 |
| C | 4.42191700  | 2.84953100  | -0.24649300 |
| C | 4.34040900  | 3.11910700  | 1.12154100  |
| C | 5.03300700  | 1.68346500  | -0.70804900 |
| C | 4.86621700  | 2.20405700  | 2.02539700  |
| H | 3.88377900  | 4.04158100  | 1.47009300  |
| C | 5.56221800  | 0.78380300  | 0.21037700  |
| H | 5.10415200  | 1.49589800  | -1.77539600 |
| C | 5.48440800  | 1.02462300  | 1.58714200  |
| H | 4.80602800  | 2.40946900  | 3.09207000  |
| H | 6.03735300  | -0.12744500 | -0.14620100 |
| C | 6.04726700  | 0.04672000  | 2.56811900  |
| H | 5.48124500  | 0.04295400  | 3.50460100  |
| H | 7.08274500  | 0.29819900  | 2.82554200  |
| H | 6.05770000  | -0.96951600 | 2.16365800  |
| C | -4.06838600 | 2.82202400  | 0.26554900  |
| C | -3.54711200 | 3.32249700  | -0.96844700 |
| C | -4.44009200 | 3.85010900  | -1.92386800 |
| C | -5.79666900 | 3.84852900  | -1.64910800 |
| C | -6.29025000 | 3.31276000  | -0.44808000 |
| C | -5.43568900 | 2.78803900  | 0.52081200  |
| C | -1.78554500 | 2.40807300  | 0.21497300  |
| C | -2.15693400 | 3.14094400  | -0.96508800 |
| H | -4.05860500 | 4.23988500  | -2.86317300 |
| H | -6.49428200 | 4.25245000  | -2.37696300 |
| H | -7.36064300 | 3.30162400  | -0.26583000 |
| H | -5.84292600 | 2.36092400  | 1.43046700  |
| H | -1.68688800 | 1.24400800  | -0.16410800 |
| H | -1.46190000 | 3.40791900  | -1.75104400 |
| N | -2.99257300 | 2.34989400  | 1.01567000  |
| C | -3.02891900 | 1.59007600  | 2.17373700  |
| C | -3.93771700 | 1.88776400  | 3.19574000  |
| N | -2.12197400 | 0.58105900  | 2.27394000  |
| C | -3.93714900 | 1.12057200  | 4.34633300  |
| H | -4.59255800 | 2.74461200  | 3.09326300  |
| C | -2.11830100 | -0.11355900 | 3.42969700  |

|   |             |             |            |
|---|-------------|-------------|------------|
| C | -3.00358200 | 0.09335700  | 4.46995400 |
| H | -4.63262800 | 1.34368400  | 5.14930300 |
| H | -1.36355900 | -0.88445400 | 3.49476200 |
| H | -2.94566900 | -0.52405000 | 5.35883500 |

**M5**

|                                              |            |             |                             |
|----------------------------------------------|------------|-------------|-----------------------------|
| Zero-point correction=                       |            |             | 0.629168 (Hartree/Particle) |
| Thermal correction to Energy=                |            |             | 0.666775                    |
| Thermal correction to Enthalpy=              |            |             | 0.667719                    |
| Thermal correction to Gibbs Free Energy=     |            |             | 0.562589                    |
| Sum of electronic and zero-point Energies=   |            |             | -2250.973483                |
| Sum of electronic and thermal Energies=      |            |             | -2250.935876                |
| Sum of electronic and thermal Enthalpies=    |            |             | -2250.934932                |
| Sum of electronic and thermal Free Energies= |            |             | -2251.040062                |
| C                                            | 6.91775700 | 0.09023200  | -1.48181200                 |
| C                                            | 5.85366500 | -0.76745800 | -1.32911000                 |
| C                                            | 4.62047400 | -0.27679200 | -0.84497100                 |
| C                                            | 4.49042600 | 1.11608800  | -0.53216100                 |
| C                                            | 5.60504400 | 1.97006400  | -0.69046000                 |
| C                                            | 6.79431700 | 1.46157100  | -1.15846900                 |
| H                                            | 7.86660900 | -0.28532900 | -1.85266600                 |
| H                                            | 5.92997100 | -1.82466900 | -1.56633800                 |
| H                                            | 5.48841600 | 3.02174600  | -0.44447000                 |
| H                                            | 7.65020900 | 2.11772000  | -1.28579500                 |
| C                                            | 2.30223900 | 0.78359400  | 0.01284300                  |
| C                                            | 2.45298000 | -0.61172900 | -0.22340400                 |
| N                                            | 3.30335300 | 1.63424300  | -0.11376300                 |
| N                                            | 3.57979200 | -1.13695800 | -0.66686800                 |
| P                                            | 0.60394300 | 1.34935300  | 0.41772500                  |
| P                                            | 0.99668800 | -1.64864500 | 0.18892700                  |
| C                                            | 0.90180200 | 2.68622600  | 1.62338600                  |
| H                                            | 1.71733800 | 3.32784700  | 1.27933300                  |
| H                                            | 0.00078400 | 3.29015200  | 1.75988300                  |
| H                                            | 1.18445000 | 2.25480100  | 2.58747500                  |
| C                                            | 0.98618400 | -2.88880700 | -1.14323000                 |
| H                                            | 1.99075200 | -3.29612100 | -1.28684600                 |
| H                                            | 0.29830600 | -3.70351900 | -0.90206100                 |
| H                                            | 0.66299400 | -2.42008100 | -2.07626600                 |
| C                                            | 1.51267000 | -2.57955300 | 1.74610500                  |
| C                                            | 1.89350900 | -1.52844500 | 2.78943100                  |
| C                                            | 0.28422800 | -3.35621800 | 2.22291700                  |
| C                                            | 2.67396000 | -3.53391500 | 1.49405800                  |
| H                                            | 2.80358600 | -0.98351500 | 2.51290400                  |
| H                                            | 1.08671000 | -0.79341000 | 2.92398400                  |

|    |             |             |             |
|----|-------------|-------------|-------------|
| H  | 2.07614200  | -2.00965900 | 3.75708300  |
| H  | -0.08369500 | -4.05845100 | 1.46582900  |
| H  | 0.54076000  | -3.94024600 | 3.11461600  |
| H  | -0.53883200 | -2.68058000 | 2.48795400  |
| H  | 2.96957500  | -3.99965200 | 2.44206800  |
| H  | 2.39926900  | -4.34008400 | 0.80656900  |
| H  | 3.55128500  | -3.02262900 | 1.08603400  |
| C  | 0.05770500  | 2.23661500  | -1.16220100 |
| C  | 0.86693700  | 3.51069600  | -1.38989300 |
| C  | 0.24361700  | 1.27417100  | -2.33413900 |
| C  | -1.42430200 | 2.57627900  | -1.01159600 |
| H  | 0.66279600  | 4.26973200  | -0.62847000 |
| H  | 1.94490000  | 3.32238400  | -1.40545900 |
| H  | 0.58710600  | 3.93795600  | -2.36023500 |
| H  | -0.29594800 | 0.33268800  | -2.17038900 |
| H  | -0.15352400 | 1.73177300  | -3.24740800 |
| H  | 1.29922200  | 1.04105000  | -2.51669300 |
| H  | -1.75504500 | 3.15389300  | -1.88259300 |
| H  | -2.03445000 | 1.66887200  | -0.96021200 |
| H  | -1.62635400 | 3.18083900  | -0.11934900 |
| Co | -0.67026000 | -0.37480200 | 0.79675800  |
| C  | -4.19923600 | -0.44061000 | -1.03720000 |
| C  | -3.61086600 | -1.34494900 | -1.96705000 |
| C  | -4.26177600 | -1.58658500 | -3.18802900 |
| C  | -5.44340000 | -0.91501900 | -3.46447700 |
| C  | -5.98172500 | 0.00544800  | -2.55204100 |
| C  | -5.36653100 | 0.25997700  | -1.32915400 |
| C  | -2.20138100 | -1.18538500 | -0.18466100 |
| C  | -2.39577900 | -1.82260400 | -1.40394000 |
| H  | -3.83476600 | -2.28269800 | -3.90468000 |
| H  | -5.95587200 | -1.09236200 | -4.40589000 |
| H  | -6.89683400 | 0.53496500  | -2.80052500 |
| H  | -5.78962500 | 0.98629700  | -0.64511000 |
| H  | -1.78924100 | -1.74938000 | 0.72246900  |
| H  | -1.73535900 | -2.56320300 | -1.83323400 |
| N  | -3.35861000 | -0.39348100 | 0.07188700  |
| C  | -3.35204500 | 0.43404500  | 1.17693100  |
| C  | -4.48047300 | 1.01877600  | 1.75440800  |
| N  | -2.10946000 | 0.59424400  | 1.69982800  |
| C  | -4.31433800 | 1.78100500  | 2.89961300  |
| H  | -5.46427600 | 0.84504300  | 1.33791700  |
| C  | -1.97444700 | 1.31092500  | 2.83422700  |
| C  | -3.04327900 | 1.92576900  | 3.45859400  |
| H  | -5.17770500 | 2.24324600  | 3.36758300  |

|   |             |            |            |
|---|-------------|------------|------------|
| H | -0.96280800 | 1.38624100 | 3.22285000 |
| H | -2.88242600 | 2.50054400 | 4.36323700 |

#### TS4

|                                              |             |             |                             |
|----------------------------------------------|-------------|-------------|-----------------------------|
| Zero-point correction=                       |             |             | 0.625468 (Hartree/Particle) |
| Thermal correction to Energy=                |             |             | 0.662714                    |
| Thermal correction to Enthalpy=              |             |             | 0.663658                    |
| Thermal correction to Gibbs Free Energy=     |             |             | 0.559837                    |
| Sum of electronic and zero-point Energies=   |             |             | -2250.919365                |
| Sum of electronic and thermal Energies=      |             |             | -2250.882119                |
| Sum of electronic and thermal Enthalpies=    |             |             | -2250.881175                |
| Sum of electronic and thermal Free Energies= |             |             | -2250.984997                |
| Imaginary frequency=-907.06 cm <sup>-1</sup> |             |             |                             |
| C                                            | 6.98997600  | -1.14802300 | -1.05261800                 |
| C                                            | 5.73235000  | -1.70266600 | -1.08372200                 |
| C                                            | 4.62663200  | -0.95455500 | -0.62080100                 |
| C                                            | 4.82908900  | 0.38001000  | -0.13716900                 |
| C                                            | 6.13530900  | 0.91843200  | -0.11004400                 |
| C                                            | 7.19218200  | 0.16339500  | -0.56121700                 |
| H                                            | 7.84287700  | -1.72108400 | -1.40360900                 |
| H                                            | 5.55783600  | -2.71075400 | -1.44818200                 |
| H                                            | 6.26932900  | 1.93025500  | 0.26147300                  |
| H                                            | 8.19654100  | 0.57601100  | -0.54653900                 |
| C                                            | 2.58554700  | 0.58406300  | 0.20558800                  |
| C                                            | 2.39888400  | -0.77390500 | -0.16875800                 |
| N                                            | 3.77720300  | 1.14859200  | 0.25146100                  |
| N                                            | 3.39063000  | -1.52244300 | -0.60924200                 |
| P                                            | 1.06180600  | 1.56335100  | 0.41997100                  |
| P                                            | 0.71754900  | -1.49143900 | 0.06252500                  |
| C                                            | 1.47272600  | 2.78884200  | 1.69663100                  |
| H                                            | 2.52025100  | 3.08562700  | 1.59176400                  |
| H                                            | 0.83710500  | 3.67138900  | 1.59116800                  |
| H                                            | 1.32111400  | 2.35850200  | 2.68962800                  |
| C                                            | 0.57797600  | -2.61769200 | -1.36223000                 |
| H                                            | 1.57138100  | -3.01245500 | -1.59426100                 |
| H                                            | -0.09380400 | -3.44958800 | -1.14204400                 |
| H                                            | 0.19451500  | -2.07751800 | -2.23072900                 |
| C                                            | 0.95107500  | -2.59836100 | 1.58073200                  |
| C                                            | 1.27025700  | -1.70061900 | 2.77503000                  |
| C                                            | -0.33438400 | -3.38088300 | 1.84351300                  |
| C                                            | 2.08780900  | -3.59543900 | 1.35050600                  |
| H                                            | 2.19425600  | -1.12861400 | 2.62959900                  |
| H                                            | 0.45663400  | -0.99448500 | 2.97814400                  |
| H                                            | 1.40664900  | -2.32133300 | 3.66771000                  |

|    |             |             |             |
|----|-------------|-------------|-------------|
| H  | -0.59604200 | -4.04019900 | 1.00910600  |
| H  | -0.17824500 | -4.01541500 | 2.72304200  |
| H  | -1.19206000 | -2.73555200 | 2.05453200  |
| H  | 2.15130200  | -4.24826300 | 2.22844600  |
| H  | 1.90829600  | -4.23456900 | 0.48027200  |
| H  | 3.05926500  | -3.11290700 | 1.22599300  |
| C  | 1.00699200  | 2.51593700  | -1.21597500 |
| C  | 2.17163400  | 3.49495900  | -1.32243200 |
| C  | 1.05870300  | 1.49267400  | -2.35143400 |
| C  | -0.31430200 | 3.27734400  | -1.27689700 |
| H  | 2.12332800  | 4.27280500  | -0.55391600 |
| H  | 3.14403400  | 3.00070600  | -1.24551200 |
| H  | 2.12439800  | 3.99362500  | -2.29770900 |
| H  | 0.26612800  | 0.73699300  | -2.26044800 |
| H  | 0.91231400  | 2.00544500  | -3.30859600 |
| H  | 2.02102100  | 0.97138300  | -2.40375300 |
| H  | -0.35417800 | 3.85228300  | -2.20906500 |
| H  | -1.17515100 | 2.59958800  | -1.26227000 |
| H  | -0.42189900 | 3.98576000  | -0.44829900 |
| Co | -0.72564300 | 0.11805900  | 0.41953200  |
| C  | -4.56147100 | -0.74841900 | -0.43851600 |
| C  | -4.09057100 | -2.06106500 | -0.70696000 |
| C  | -4.98942800 | -3.02802300 | -1.18153200 |
| C  | -6.31557300 | -2.67116600 | -1.37764400 |
| C  | -6.75904700 | -1.36631600 | -1.10853700 |
| C  | -5.89298500 | -0.38442700 | -0.63864100 |
| C  | -2.30371100 | -0.83567000 | 0.02824700  |
| C  | -2.69843800 | -2.09002800 | -0.39258500 |
| H  | -4.64789000 | -4.03891300 | -1.38900200 |
| H  | -7.02293100 | -3.40869700 | -1.74633100 |
| H  | -7.80328100 | -1.11342900 | -1.27004900 |
| H  | -6.23500700 | 0.62321100  | -0.43789100 |
| H  | -1.28357400 | -0.82188200 | 1.39379100  |
| H  | -2.05815300 | -2.95828600 | -0.46336700 |
| N  | -3.46909500 | -0.02269100 | 0.03340600  |
| C  | -3.39449500 | 1.30753600  | 0.41214200  |
| C  | -2.28105200 | 1.71461900  | 1.17622000  |
| N  | -4.35352500 | 2.14467100  | 0.01214300  |
| C  | -2.17130800 | 3.06084600  | 1.51494800  |
| H  | -1.69158600 | 0.97726000  | 1.76229400  |
| C  | -4.22122800 | 3.43073400  | 0.35656200  |
| C  | -3.15187100 | 3.94670400  | 1.08429600  |
| H  | -1.34701700 | 3.39786800  | 2.13705300  |
| H  | -5.02574900 | 4.08694400  | 0.02928500  |

|   |             |            |            |
|---|-------------|------------|------------|
| H | -3.11016100 | 5.00207200 | 1.32886500 |
|---|-------------|------------|------------|

**M6**

|                        |  |  |                             |
|------------------------|--|--|-----------------------------|
| Zero-point correction= |  |  | 0.628095 (Hartree/Particle) |
|------------------------|--|--|-----------------------------|

|                               |  |  |          |
|-------------------------------|--|--|----------|
| Thermal correction to Energy= |  |  | 0.665414 |
|-------------------------------|--|--|----------|

|                                 |  |  |          |
|---------------------------------|--|--|----------|
| Thermal correction to Enthalpy= |  |  | 0.666359 |
|---------------------------------|--|--|----------|

|                                          |  |  |          |
|------------------------------------------|--|--|----------|
| Thermal correction to Gibbs Free Energy= |  |  | 0.561640 |
|------------------------------------------|--|--|----------|

|                                            |  |  |              |
|--------------------------------------------|--|--|--------------|
| Sum of electronic and zero-point Energies= |  |  | -2250.969571 |
|--------------------------------------------|--|--|--------------|

|                                         |  |  |              |
|-----------------------------------------|--|--|--------------|
| Sum of electronic and thermal Energies= |  |  | -2250.932251 |
|-----------------------------------------|--|--|--------------|

|                                           |  |  |              |
|-------------------------------------------|--|--|--------------|
| Sum of electronic and thermal Enthalpies= |  |  | -2250.931307 |
|-------------------------------------------|--|--|--------------|

|                                              |  |  |              |
|----------------------------------------------|--|--|--------------|
| Sum of electronic and thermal Free Energies= |  |  | -2251.036026 |
|----------------------------------------------|--|--|--------------|

|   |             |             |             |
|---|-------------|-------------|-------------|
| C | 6.65761400  | -2.36368100 | -0.06925400 |
| C | 5.31956200  | -2.67408800 | -0.00341100 |
| C | 4.35874100  | -1.63801800 | -0.03064700 |
| C | 4.79360600  | -0.27543900 | -0.13381200 |
| C | 6.17588300  | 0.01023500  | -0.20041300 |
| C | 7.08636700  | -1.01896000 | -0.16660800 |
| H | 7.39892800  | -3.15699900 | -0.04432400 |
| H | 4.97111700  | -3.69979300 | 0.07418500  |
| H | 6.48456000  | 1.04864400  | -0.27581200 |
| H | 8.14941100  | -0.80247500 | -0.21488500 |
| C | 2.62058300  | 0.41481400  | -0.10134100 |
| C | 2.19096900  | -0.93425900 | 0.03247200  |
| N | 3.89686900  | 0.74605700  | -0.17053200 |
| N | 3.03666300  | -1.94602000 | 0.05772800  |
| P | 1.30940100  | 1.68627200  | -0.17273200 |
| P | 0.38277700  | -1.24608700 | 0.21847600  |
| C | 1.81571900  | 2.81238900  | 1.17341100  |
| H | 2.87631800  | 3.06019900  | 1.07259100  |
| H | 1.23167200  | 3.73566500  | 1.14765800  |
| H | 1.66349900  | 2.32558400  | 2.14070900  |
| C | 0.15415700  | -2.77687700 | -0.72744600 |
| H | 0.96722100  | -3.46576300 | -0.48300700 |
| H | -0.80705100 | -3.23823500 | -0.49367000 |
| H | 0.19029300  | -2.55283000 | -1.79533800 |
| C | 0.14112900  | -1.71142000 | 2.02178700  |
| C | 0.61970000  | -0.54283000 | 2.88104100  |
| C | -1.35196700 | -1.95272500 | 2.23969900  |
| C | 0.92641200  | -2.97647400 | 2.36474900  |
| H | 1.69064800  | -0.34758200 | 2.75029100  |
| H | 0.06896000  | 0.37722400  | 2.65462500  |
| H | 0.45477200  | -0.77619000 | 3.93875200  |
| H | -1.73937600 | -2.75973300 | 1.60796000  |
| H | -1.52131000 | -2.24163400 | 3.28314500  |

|    |             |             |             |
|----|-------------|-------------|-------------|
| H  | -1.94127100 | -1.05307400 | 2.04215300  |
| H  | 0.78700900  | -3.19150600 | 3.43070800  |
| H  | 0.57061900  | -3.84734800 | 1.80674200  |
| H  | 1.99940300  | -2.86786000 | 2.18425300  |
| C  | 1.55662600  | 2.66747400  | -1.76156300 |
| C  | 2.60893900  | 3.76024700  | -1.60661100 |
| C  | 1.95876700  | 1.72958800  | -2.89780300 |
| C  | 0.17774000  | 3.27254900  | -2.04515200 |
| H  | 2.33524100  | 4.49810500  | -0.84722200 |
| H  | 3.58843400  | 3.34528200  | -1.34759100 |
| H  | 2.71437000  | 4.29260100  | -2.55923500 |
| H  | 1.24712400  | 0.90800400  | -3.03031200 |
| H  | 1.98568200  | 2.29708100  | -3.83511900 |
| H  | 2.95464500  | 1.30266400  | -2.74234200 |
| H  | 0.19480000  | 3.83949600  | -2.98294500 |
| H  | -0.58451800 | 2.48438700  | -2.13942200 |
| H  | -0.14232600 | 3.95558200  | -1.24863100 |
| Co | -0.62060400 | 0.52553000  | -0.38249600 |
| C  | -4.47570100 | -0.68352900 | -0.58827900 |
| C  | -4.03684100 | -1.50621500 | -1.66219200 |
| C  | -4.95671800 | -2.32088800 | -2.33318200 |
| C  | -6.28452900 | -2.31557300 | -1.92741200 |
| C  | -6.69843500 | -1.51411000 | -0.85601800 |
| C  | -5.80591400 | -0.69120200 | -0.17206500 |
| C  | -2.19704400 | -0.39277300 | -0.87887000 |
| C  | -2.62690400 | -1.30995900 | -1.80819800 |
| H  | -4.62814100 | -2.94978200 | -3.15656200 |
| H  | -7.00956400 | -2.94319500 | -2.43803200 |
| H  | -7.73761500 | -1.53344800 | -0.54099800 |
| H  | -6.16303000 | -0.10922200 | 0.66773700  |
| H  | 0.02813900  | 0.01794700  | -1.60406100 |
| H  | -1.99157800 | -1.81079200 | -2.52800700 |
| N  | -3.34085100 | -0.00172100 | -0.13004400 |
| C  | -3.18141600 | 0.99591900  | 0.80874100  |
| C  | -4.20995900 | 1.61002300  | 1.53130000  |
| N  | -1.88087800 | 1.36375900  | 0.97245100  |
| C  | -3.88611200 | 2.59136300  | 2.45204700  |
| H  | -5.24279100 | 1.34422900  | 1.36022700  |
| C  | -1.59351200 | 2.32033100  | 1.87633900  |
| C  | -2.55270100 | 2.95222700  | 2.64387400  |
| H  | -4.67714000 | 3.07758100  | 3.01436500  |
| H  | -0.54238000 | 2.56916900  | 1.97525800  |
| H  | -2.26232600 | 3.71260600  | 3.35908300  |



**TS5**

|                                              |             |             |                             |
|----------------------------------------------|-------------|-------------|-----------------------------|
| Zero-point correction=                       |             |             | 0.966159 (Hartree/Particle) |
| Thermal correction to Energy=                |             |             | 1.025382                    |
| Thermal correction to Enthalpy=              |             |             | 1.026326                    |
| Thermal correction to Gibbs Free Energy=     |             |             | 0.875945                    |
| Sum of electronic and zero-point Energies=   |             |             | -3589.271953                |
| Sum of electronic and thermal Energies=      |             |             | -3589.212730                |
| Sum of electronic and thermal Enthalpies=    |             |             | -3589.211785                |
| Sum of electronic and thermal Free Energies= |             |             | -3589.362167                |
| Imaginary frequency=-229.95 cm <sup>-1</sup> |             |             |                             |
| C                                            | 7.76913900  | -2.52802900 | -2.11847000                 |
| C                                            | 6.41188900  | -2.61071600 | -2.32117800                 |
| C                                            | 5.54690900  | -1.74120700 | -1.61816100                 |
| C                                            | 6.09844000  | -0.77645600 | -0.71564400                 |
| C                                            | 7.49737300  | -0.71798100 | -0.52524500                 |
| C                                            | 8.31280500  | -1.58132000 | -1.21747500                 |
| H                                            | 8.43740300  | -3.19679200 | -2.65269800                 |
| H                                            | 5.97729000  | -3.33433000 | -3.00450100                 |
| H                                            | 7.89500500  | 0.01977400  | 0.16545100                  |
| H                                            | 9.38877700  | -1.53859400 | -1.07777000                 |
| C                                            | 3.99370800  | -0.01142400 | -0.26839400                 |
| C                                            | 3.43690000  | -1.02395600 | -1.09655500                 |
| N                                            | 5.29349900  | 0.10275800  | -0.06588500                 |
| N                                            | 4.20365300  | -1.84533200 | -1.78794900                 |
| P                                            | 2.84757200  | 1.23433800  | 0.41694200                  |
| P                                            | 1.59243800  | -1.18377500 | -1.15945500                 |
| C                                            | 3.59370100  | 1.61851600  | 2.03010900                  |
| H                                            | 4.67069300  | 1.75039400  | 1.90190700                  |
| H                                            | 3.16588600  | 2.53224100  | 2.45023500                  |
| H                                            | 3.42342000  | 0.79371800  | 2.72562600                  |
| C                                            | 1.25047100  | -0.86617800 | -2.91980500                 |
| H                                            | 1.90881200  | -1.48466900 | -3.53495100                 |
| H                                            | 0.20908600  | -1.10268600 | -3.15605100                 |
| H                                            | 1.44016100  | 0.18130200  | -3.15550200                 |
| C                                            | 1.31832200  | -3.06763100 | -1.00227200                 |
| C                                            | 2.06892000  | -3.55923000 | 0.23215600                  |
| C                                            | -0.17178300 | -3.39581100 | -0.88312500                 |
| C                                            | 1.82764100  | -3.79883100 | -2.25090200                 |
| H                                            | 3.15406300  | -3.48505100 | 0.10948500                  |
| H                                            | 1.78571600  | -3.00650600 | 1.13380400                  |
| H                                            | 1.82898000  | -4.61416500 | 0.40691700                  |
| H                                            | -0.76434500 | -2.91139800 | -1.66700300                 |
| H                                            | -0.29230000 | -4.47689100 | -1.01670700                 |
| H                                            | -0.59066700 | -3.13942700 | 0.08974700                  |

|    |             |             |             |
|----|-------------|-------------|-------------|
| H  | 1.74595600  | -4.87501400 | -2.05830100 |
| H  | 1.21070100  | -3.58164400 | -3.12780400 |
| H  | 2.86756200  | -3.57244100 | -2.48672800 |
| C  | 3.22911000  | 2.76619800  | -0.62885600 |
| C  | 4.66537500  | 3.23548700  | -0.39580300 |
| C  | 3.02924800  | 2.41255700  | -2.10008600 |
| C  | 2.27125100  | 3.88511700  | -0.22464400 |
| H  | 4.81808500  | 3.61134900  | 0.62032000  |
| H  | 5.40596700  | 2.45481500  | -0.58836300 |
| H  | 4.86650300  | 4.06528600  | -1.08350600 |
| H  | 2.00316100  | 2.08476600  | -2.29681600 |
| H  | 3.21212300  | 3.30351800  | -2.71159000 |
| H  | 3.72372800  | 1.63560800  | -2.44154000 |
| H  | 2.57516800  | 4.81040700  | -0.72724000 |
| H  | 1.24454000  | 3.66988600  | -0.52560100 |
| H  | 2.29212900  | 4.07996500  | 0.85417700  |
| Co | 0.80814100  | 0.25475000  | 0.45391600  |
| C  | -1.64728200 | 3.32545400  | -0.69337900 |
| C  | -1.54278100 | 2.81101700  | -2.00916100 |
| C  | -2.27711600 | 3.40548600  | -3.04061200 |
| C  | -3.10562300 | 4.48207800  | -2.74735000 |
| C  | -3.22441600 | 4.95659400  | -1.43542200 |
| C  | -2.50489400 | 4.38194000  | -0.38863300 |
| C  | -0.21582200 | 1.49194700  | -0.68524600 |
| C  | -0.65858400 | 1.68174600  | -1.96566200 |
| H  | -2.21126700 | 3.01408100  | -4.05301900 |
| H  | -3.68163900 | 4.95195300  | -3.54012100 |
| H  | -3.89675800 | 5.78213400  | -1.21930400 |
| H  | -2.65091600 | 4.74972900  | 0.62007800  |
| H  | -0.42655100 | 1.06231700  | -2.81859100 |
| N  | -0.81697700 | 2.52350800  | 0.09896900  |
| C  | -0.43821700 | 2.65782700  | 1.40752200  |
| C  | -0.70325500 | 3.75840700  | 2.23537800  |
| N  | 0.29251800  | 1.61117300  | 1.85767700  |
| C  | -0.29161900 | 3.71361000  | 3.55455800  |
| H  | -1.19556000 | 4.63527100  | 1.83892300  |
| C  | 0.65282600  | 1.56513400  | 3.15188300  |
| C  | 0.36709700  | 2.58269100  | 4.04259800  |
| H  | -0.48823700 | 4.56053200  | 4.20498700  |
| H  | 1.20725100  | 0.68020300  | 3.44888700  |
| H  | 0.67900600  | 2.50221800  | 5.07724000  |
| C  | -1.09904500 | -3.24189700 | 4.52783800  |
| C  | -1.17349100 | -2.49642900 | 3.35901500  |
| C  | -0.02280900 | -1.87311700 | 2.83527200  |

|   |             |             |             |
|---|-------------|-------------|-------------|
| C | 1.19278900  | -2.01730800 | 3.52114200  |
| C | 1.26065000  | -2.76783000 | 4.68879200  |
| C | 0.11667500  | -3.38029100 | 5.19751100  |
| H | -1.99487300 | -3.71577600 | 4.91912700  |
| H | -2.12040000 | -2.38857700 | 2.83423700  |
| H | 2.08588400  | -1.53740700 | 3.12250600  |
| H | 2.21049400  | -2.87273100 | 5.20520200  |
| H | 0.17102000  | -3.96206300 | 6.11288500  |
| C | -0.18554600 | -1.12795500 | 1.61393300  |
| C | -0.94400700 | -0.71241300 | 0.68557200  |
| C | -2.16387600 | -0.89490000 | -0.12121400 |
| H | -2.65341300 | -1.82982000 | 0.21086400  |
| H | -1.86972700 | -1.02471500 | -1.16798500 |
| N | -3.11528900 | 0.22525800  | -0.07970500 |
| C | -3.91777400 | 0.28754300  | 1.16965000  |
| H | -4.71516100 | 1.01508800  | 0.99803100  |
| H | -4.38694600 | -0.69691400 | 1.34940200  |
| C | -3.13849800 | 0.69576000  | 2.37736500  |
| C | -3.34003500 | 1.84941700  | 3.01302100  |
| H | -2.42118200 | -0.01856700 | 2.78091300  |
| H | -2.80022700 | 2.09994100  | 3.92215000  |
| H | -4.05524300 | 2.58413500  | 2.64623300  |
| S | -4.12241600 | 0.26650400  | -1.46531200 |
| O | -4.92999800 | 1.47381200  | -1.33191100 |
| O | -3.25921800 | 0.04775800  | -2.62267400 |
| C | -5.19995700 | -1.13993700 | -1.32560500 |
| C | -6.44387200 | -1.00332800 | -0.71125700 |
| C | -4.76149200 | -2.38424700 | -1.78613600 |
| C | -7.25626500 | -2.12322600 | -0.57086700 |
| H | -6.77466800 | -0.02853600 | -0.36472100 |
| C | -5.58510000 | -3.49084600 | -1.63455800 |
| H | -3.79684900 | -2.47456000 | -2.27802900 |
| C | -6.84327100 | -3.38076200 | -1.02448400 |
| H | -8.23197300 | -2.02044200 | -0.10260100 |
| H | -5.25217800 | -4.45951500 | -1.99987500 |
| C | -7.72455600 | -4.57966000 | -0.87939200 |
| H | -8.61680100 | -4.35576000 | -0.28994700 |
| H | -8.05500900 | -4.94763200 | -1.85691800 |
| H | -7.19676200 | -5.40857000 | -0.39731000 |
| H | 1.60418200  | -0.59398700 | 1.42729900  |

#### M7

|                               |                             |
|-------------------------------|-----------------------------|
| Zero-point correction=        | 0.972671 (Hartree/Particle) |
| Thermal correction to Energy= | 1.031934                    |

|                                              |             |             |              |
|----------------------------------------------|-------------|-------------|--------------|
| Thermal correction to Enthalpy=              |             |             | 1.032879     |
| Thermal correction to Gibbs Free Energy=     |             |             | 0.882268     |
| Sum of electronic and zero-point Energies=   |             |             | -3589.301086 |
| Sum of electronic and thermal Energies=      |             |             | -3589.241823 |
| Sum of electronic and thermal Enthalpies=    |             |             | -3589.240879 |
| Sum of electronic and thermal Free Energies= |             |             | -3589.391489 |
| C                                            | 7.01885400  | -3.26764700 | -2.70067800  |
| C                                            | 5.65062900  | -3.13564500 | -2.68449300  |
| C                                            | 5.03654400  | -2.34071000 | -1.68989000  |
| C                                            | 5.85248100  | -1.65797800 | -0.72802800  |
| C                                            | 7.25557500  | -1.82769900 | -0.76146000  |
| C                                            | 7.82216700  | -2.61860700 | -1.73274300  |
| H                                            | 7.49444400  | -3.88025500 | -3.46081500  |
| H                                            | 5.01640600  | -3.63544700 | -3.41086700  |
| H                                            | 7.85671200  | -1.30779900 | -0.02105500  |
| H                                            | 8.90018700  | -2.74420000 | -1.76725300  |
| C                                            | 3.98307000  | -0.68951000 | 0.15626000   |
| C                                            | 3.17025500  | -1.48400100 | -0.69897500  |
| N                                            | 5.29880600  | -0.80880800 | 0.17667400   |
| N                                            | 3.68144600  | -2.26946400 | -1.62861900  |
| P                                            | 3.13843900  | 0.65638200  | 1.07137400   |
| P                                            | 1.36371600  | -1.53037600 | -0.37192200  |
| C                                            | 3.77985200  | 0.52427400  | 2.77434400   |
| H                                            | 4.85611800  | 0.33089500  | 2.76828500   |
| H                                            | 3.58792200  | 1.45287100  | 3.31947600   |
| H                                            | 3.27863100  | -0.29413100 | 3.29845200   |
| C                                            | 0.70371300  | -2.04611900 | -1.98875400  |
| H                                            | 0.90816300  | -3.10968800 | -2.14065300  |
| H                                            | -0.36659500 | -1.86197100 | -2.08406800  |
| H                                            | 1.21532700  | -1.49352000 | -2.77908400  |
| C                                            | 1.23036900  | -3.05802700 | 0.73801100   |
| C                                            | 1.64646000  | -2.61242000 | 2.13844200   |
| C                                            | -0.22282600 | -3.53263600 | 0.72169200   |
| C                                            | 2.13753300  | -4.19163500 | 0.26622200   |
| H                                            | 2.70245200  | -2.31755900 | 2.16689200   |
| H                                            | 1.04327400  | -1.76263500 | 2.48173200   |
| H                                            | 1.51521600  | -3.43205100 | 2.85444000   |
| H                                            | -0.53094700 | -3.86774700 | -0.27488200  |
| H                                            | -0.32487500 | -4.38745700 | 1.40039000   |
| H                                            | -0.91888500 | -2.76205300 | 1.06137600   |
| H                                            | 1.92195400  | -5.08225700 | 0.86775900   |
| H                                            | 1.97458400  | -4.45800800 | -0.78294400  |
| H                                            | 3.19773900  | -3.95675800 | 0.39649900   |
| C                                            | 3.98034700  | 2.19144700  | 0.34290700   |

|    |             |             |             |
|----|-------------|-------------|-------------|
| C  | 5.39202600  | 2.35488600  | 0.90256100  |
| C  | 4.03141200  | 2.04481900  | -1.17842500 |
| C  | 3.14235200  | 3.41698800  | 0.70231400  |
| H  | 5.38744700  | 2.56429700  | 1.97655400  |
| H  | 6.01390000  | 1.47389500  | 0.72238600  |
| H  | 5.86566700  | 3.20954700  | 0.40473700  |
| H  | 3.04313900  | 1.83217300  | -1.60148400 |
| H  | 4.38026400  | 2.98802200  | -1.61398000 |
| H  | 4.72487800  | 1.26043200  | -1.49800500 |
| H  | 3.69694400  | 4.32063000  | 0.42429300  |
| H  | 2.20028200  | 3.43040100  | 0.14876100  |
| H  | 2.92474400  | 3.48359900  | 1.77469700  |
| Co | 0.79652200  | 0.31741800  | 0.83899900  |
| C  | -0.62123000 | 3.36980500  | -1.30433500 |
| C  | -0.23433900 | 2.60558800  | -2.43589200 |
| C  | -0.53208500 | 3.07775200  | -3.71822200 |
| C  | -1.21740300 | 4.27989000  | -3.85159900 |
| C  | -1.61564200 | 5.00778300  | -2.72416600 |
| C  | -1.32698700 | 4.56271500  | -1.43424700 |
| C  | 0.37743600  | 1.41561600  | -0.60248100 |
| C  | 0.37973000  | 1.39515800  | -1.96689900 |
| H  | -0.24854800 | 2.49805600  | -4.59290500 |
| H  | -1.46212000 | 4.65325300  | -4.84242500 |
| H  | -2.17091200 | 5.93308000  | -2.84914300 |
| H  | -1.68005700 | 5.12860300  | -0.58010700 |
| H  | 0.71989100  | 0.58594600  | -2.59659400 |
| N  | -0.21094600 | 2.63818000  | -0.18197900 |
| C  | -0.08708300 | 2.97581900  | 1.14298800  |
| C  | -0.39271600 | 4.21387600  | 1.72060200  |
| N  | 0.43776800  | 1.97022800  | 1.88248200  |
| C  | -0.17554800 | 4.38473700  | 3.07619900  |
| H  | -0.77554400 | 5.02498100  | 1.11647900  |
| C  | 0.64475600  | 2.15164500  | 3.19807900  |
| C  | 0.34529200  | 3.33798000  | 3.84061000  |
| H  | -0.40619900 | 5.33969100  | 3.53855000  |
| H  | 1.06961300  | 1.30576600  | 3.73309900  |
| H  | 0.52612500  | 3.44041700  | 4.90402300  |
| C  | -4.51451700 | -1.92631700 | 3.61326300  |
| C  | -3.61647400 | -1.17614700 | 2.86010100  |
| C  | -2.23758900 | -1.22698000 | 3.12183900  |
| C  | -1.80171900 | -2.03701200 | 4.18696700  |
| C  | -2.69825100 | -2.79187300 | 4.93339600  |
| C  | -4.06183400 | -2.74423400 | 4.64610500  |
| H  | -5.57735500 | -1.86188200 | 3.39556400  |

|   |             |             |             |
|---|-------------|-------------|-------------|
| H | -3.99467200 | -0.51908900 | 2.08411300  |
| H | -0.73854300 | -2.07063700 | 4.42002800  |
| H | -2.33349900 | -3.41511100 | 5.74574400  |
| H | -4.76626000 | -3.32842500 | 5.23141700  |
| C | -1.21351200 | -0.48169600 | 2.37228600  |
| C | -1.07546500 | -0.18736700 | 1.06020700  |
| C | -2.08005500 | -0.53322300 | 0.00223300  |
| H | -2.88325200 | -1.16510900 | 0.41937400  |
| H | -1.56972700 | -1.13419300 | -0.75507500 |
| N | -2.67692300 | 0.61398900  | -0.72301100 |
| C | -3.76604500 | 1.31192700  | 0.00372600  |
| H | -4.30689500 | 1.92272200  | -0.72267100 |
| H | -4.47708200 | 0.56363500  | 0.40014600  |
| C | -3.28856500 | 2.20055500  | 1.10483000  |
| C | -3.63783100 | 3.48394800  | 1.19124100  |
| H | -2.67126600 | 1.75082800  | 1.88299800  |
| H | -3.33250900 | 4.10389300  | 2.03007300  |
| H | -4.25577900 | 3.95697100  | 0.42958800  |
| S | -3.15489900 | 0.18951600  | -2.30280300 |
| O | -3.76673700 | 1.38084000  | -2.88317800 |
| O | -2.00557100 | -0.44807600 | -2.94269700 |
| C | -4.41203900 | -1.05002200 | -2.10457000 |
| C | -5.74828500 | -0.66829200 | -1.99152500 |
| C | -4.03990600 | -2.39119200 | -1.98498800 |
| C | -6.71608700 | -1.64317500 | -1.77380700 |
| H | -6.02552100 | 0.37726500  | -2.09164500 |
| C | -5.01965100 | -3.35035100 | -1.76598700 |
| H | -2.99489100 | -2.67708000 | -2.07799100 |
| C | -6.37122900 | -2.99472400 | -1.65759900 |
| H | -7.76054300 | -1.35120800 | -1.69498200 |
| H | -4.73468600 | -4.39648300 | -1.68101500 |
| C | -7.41783100 | -4.04187800 | -1.44756500 |
| H | -8.35837400 | -3.61035200 | -1.09688900 |
| H | -7.63121200 | -4.57500600 | -2.38125500 |
| H | -7.09336900 | -4.79556300 | -0.72424900 |
| H | -0.35320900 | -0.24237500 | 3.01176100  |

#### TS6R

|                                            |                             |
|--------------------------------------------|-----------------------------|
| Zero-point correction=                     | 0.974223 (Hartree/Particle) |
| Thermal correction to Energy=              | 1.031711                    |
| Thermal correction to Enthalpy=            | 1.032656                    |
| Thermal correction to Gibbs Free Energy=   | 0.888679                    |
| Sum of electronic and zero-point Energies= | -3589.264446                |
| Sum of electronic and thermal Energies=    | -3589.206958                |

|                                              |             |             |              |
|----------------------------------------------|-------------|-------------|--------------|
| Sum of electronic and thermal Enthalpies=    |             |             | -3589.206014 |
| Sum of electronic and thermal Free Energies= |             |             | -3589.349991 |
| Imaginary frequency=-284.73 cm <sup>-1</sup> |             |             |              |
| C                                            | -4.31530200 | -3.98602600 | -3.14118000  |
| C                                            | -3.00272800 | -3.57477200 | -3.17623600  |
| C                                            | -2.35461700 | -3.21174600 | -1.97430800  |
| C                                            | -3.07556900 | -3.25731600 | -0.74385500  |
| C                                            | -4.42057800 | -3.68749100 | -0.73533300  |
| C                                            | -5.02386600 | -4.04756200 | -1.91810700  |
| H                                            | -4.82078500 | -4.26368900 | -4.06142800  |
| H                                            | -2.44356900 | -3.51620600 | -4.10607200  |
| H                                            | -4.95115300 | -3.71252700 | 0.21253300   |
| H                                            | -6.05883200 | -4.37606000 | -1.92010900  |
| C                                            | -1.23590400 | -2.44176800 | 0.36126000   |
| C                                            | -0.50676500 | -2.39807700 | -0.87534700  |
| N                                            | -2.48846500 | -2.85096500 | 0.41164000   |
| N                                            | -1.07085000 | -2.77169100 | -2.00637100  |
| P                                            | -0.45877000 | -1.77298600 | 1.90026300   |
| P                                            | 1.20399900  | -1.67624000 | -0.93547000  |
| C                                            | -1.85378700 | -0.93025100 | 2.75005500   |
| H                                            | -2.80821100 | -1.37625500 | 2.45708000   |
| H                                            | -1.73282300 | -1.03342900 | 3.83032400   |
| H                                            | -1.87503600 | 0.13953800  | 2.53115700   |
| C                                            | 2.27035700  | -3.08458900 | -0.45443500  |
| H                                            | 1.96786400  | -4.00462300 | -0.96019100  |
| H                                            | 3.30549800  | -2.85733100 | -0.72730700  |
| H                                            | 2.23606400  | -3.24015100 | 0.62360800   |
| C                                            | 1.62261100  | -1.48050700 | -2.77226000  |
| C                                            | 0.61701900  | -0.54315600 | -3.43344500  |
| C                                            | 3.01422900  | -0.85324900 | -2.88082900  |
| C                                            | 1.66084800  | -2.83325700 | -3.49028700  |
| H                                            | -0.38944000 | -0.96620300 | -3.46587100  |
| H                                            | 0.57774900  | 0.42013000  | -2.91448900  |
| H                                            | 0.93428800  | -0.34624700 | -4.46447500  |
| H                                            | 3.78441600  | -1.42150300 | -2.34840100  |
| H                                            | 3.29855400  | -0.83964800 | -3.93925800  |
| H                                            | 3.02658100  | 0.17760300  | -2.52223100  |
| H                                            | 1.86469800  | -2.64463100 | -4.55126400  |
| H                                            | 2.46955500  | -3.46950800 | -3.11814500  |
| H                                            | 0.71910400  | -3.37854700 | -3.41995700  |
| C                                            | -0.33117600 | -3.35193100 | 3.01235900   |
| C                                            | -1.66845800 | -4.09736800 | 3.02972800   |
| C                                            | 0.73304400  | -4.30135500 | 2.47139200   |
| C                                            | -0.01642300 | -2.96293800 | 4.46137100   |

|    |             |             |             |
|----|-------------|-------------|-------------|
| H  | -2.50916300 | -3.46130900 | 3.32054800  |
| H  | -1.90621100 | -4.56305900 | 2.07171000  |
| H  | -1.58943100 | -4.89636600 | 3.77702000  |
| H  | 1.74683800  | -3.89910100 | 2.55152000  |
| H  | 0.70891400  | -5.22887400 | 3.05493900  |
| H  | 0.54645200  | -4.57087300 | 1.42633800  |
| H  | 0.20426100  | -3.88043700 | 5.01878700  |
| H  | 0.84329500  | -2.30090300 | 4.59159700  |
| H  | -0.87128500 | -2.49391100 | 4.95606100  |
| Co | 1.23749900  | 0.03172400  | 0.75032300  |
| C  | 4.93885500  | 0.85461900  | -0.73915900 |
| C  | 4.39829400  | 2.05848700  | -1.24415000 |
| C  | 5.18983400  | 2.88693600  | -2.04747300 |
| C  | 6.48860700  | 2.49094500  | -2.34458700 |
| C  | 6.99510700  | 1.27482600  | -1.86905000 |
| C  | 6.22642600  | 0.43451600  | -1.06556500 |
| C  | 2.70045000  | 1.00194400  | -0.11308100 |
| C  | 3.02293600  | 2.12618000  | -0.83450300 |
| H  | 4.78665600  | 3.81597200  | -2.44189100 |
| H  | 7.11393100  | 3.12163100  | -2.97019000 |
| H  | 8.00092700  | 0.96795600  | -2.14110400 |
| H  | 6.62377400  | -0.52505100 | -0.75491300 |
| H  | 2.37576000  | 2.95234600  | -1.08773900 |
| N  | 3.90909900  | 0.24097200  | -0.01332600 |
| C  | 4.00485900  | -0.63893400 | 1.03648600  |
| C  | 5.18727400  | -1.21619800 | 1.51429100  |
| N  | 2.81392600  | -0.85188800 | 1.64157100  |
| C  | 5.13582100  | -1.99186000 | 2.65863000  |
| H  | 6.12953400  | -1.02227800 | 1.02232400  |
| C  | 2.79889700  | -1.56058800 | 2.78026500  |
| C  | 3.92042700  | -2.15912400 | 3.32150100  |
| H  | 6.04608800  | -2.43855800 | 3.04615200  |
| H  | 1.83314900  | -1.63162600 | 3.25830300  |
| H  | 3.83656600  | -2.73119500 | 4.23873100  |
| C  | -3.62783900 | 0.79142500  | -3.47276400 |
| C  | -2.52003600 | 0.84438100  | -2.63363200 |
| C  | -2.62575600 | 0.48400300  | -1.27567200 |
| C  | -3.88068300 | 0.02930800  | -0.81905400 |
| C  | -4.98725800 | -0.01354900 | -1.65603500 |
| C  | -4.86695900 | 0.37298800  | -2.99027500 |
| H  | -3.51805700 | 1.07130900  | -4.51696600 |
| H  | -1.56283100 | 1.13571800  | -3.05218200 |
| H  | -3.97596300 | -0.28076600 | 0.22137400  |
| H  | -5.94214500 | -0.36186400 | -1.27069800 |



|   |             |             |             |
|---|-------------|-------------|-------------|
| H | -5.72702800 | 0.33311300  | -3.65247100 |
| C | -1.53828200 | 0.47780100  | -0.30031500 |
| C | -0.32793300 | 1.09180000  | -0.25675600 |
| C | -0.07316500 | 2.29161000  | -1.12488500 |
| H | -0.93103100 | 2.49397300  | -1.76815000 |
| H | 0.79121000  | 2.16768200  | -1.78210500 |
| N | 0.12818600  | 3.49640400  | -0.29114700 |
| C | 0.66941900  | 3.19831100  | 1.03531700  |
| H | 1.76217200  | 3.21682700  | 0.99817700  |
| H | 0.37103700  | 3.98898200  | 1.73155800  |
| C | 0.21196500  | 1.87846300  | 1.58960100  |
| C | 1.14097700  | 1.17737500  | 2.39820200  |
| H | -0.83928600 | 1.81618300  | 1.86319900  |
| H | 0.77830700  | 0.56896700  | 3.22550200  |
| H | 2.12737600  | 1.61587300  | 2.54023800  |
| S | -1.08659000 | 4.67435600  | -0.30875100 |
| O | -0.48830600 | 5.84570300  | 0.32576000  |
| O | -1.58725400 | 4.71561500  | -1.67962100 |
| C | -2.38426900 | 4.10042300  | 0.75680600  |
| C | -2.32189500 | 4.37402900  | 2.12449900  |
| C | -3.40727900 | 3.31018700  | 0.23154100  |
| C | -3.27882800 | 3.82449600  | 2.97051200  |
| H | -1.54170200 | 5.02093900  | 2.51522400  |
| C | -4.35864000 | 2.77735300  | 1.09148900  |
| H | -3.46092600 | 3.12489400  | -0.83817900 |
| C | -4.30294600 | 3.01046000  | 2.47262600  |
| H | -3.23676500 | 4.03637500  | 4.03617200  |
| H | -5.16150000 | 2.16666400  | 0.68417600  |
| C | -5.31561100 | 2.39758700  | 3.38605800  |
| H | -5.25258300 | 1.30325200  | 3.36697400  |
| H | -5.17762900 | 2.72205400  | 4.42009400  |
| H | -6.33590900 | 2.65412100  | 3.08357200  |
| H | -1.78979200 | -0.15865900 | 0.53604200  |

### TS6S

|                                              |                             |
|----------------------------------------------|-----------------------------|
| Zero-point correction=                       | 0.972110 (Hartree/Particle) |
| Thermal correction to Energy=                | 1.029950                    |
| Thermal correction to Enthalpy=              | 1.030894                    |
| Thermal correction to Gibbs Free Energy=     | 0.885540                    |
| Sum of electronic and zero-point Energies=   | -3589.251789                |
| Sum of electronic and thermal Energies=      | -3589.193949                |
| Sum of electronic and thermal Enthalpies=    | -3589.193005                |
| Sum of electronic and thermal Free Energies= | -3589.338360                |
| Imaginary frequency=-344.19 cm <sup>-1</sup> |                             |

|   |             |             |             |
|---|-------------|-------------|-------------|
| C | -3.50705500 | 3.63333000  | 3.74531300  |
| C | -2.36115500 | 2.87881000  | 3.63990000  |
| C | -1.65099100 | 2.86186700  | 2.41800800  |
| C | -2.13686600 | 3.61255400  | 1.30816800  |
| C | -3.31989800 | 4.37315200  | 1.44127100  |
| C | -3.98618400 | 4.38294400  | 2.64488400  |
| H | -4.05592800 | 3.65594100  | 4.68224000  |
| H | -1.97943400 | 2.29337100  | 4.47251000  |
| H | -3.67457300 | 4.93496800  | 0.58155900  |
| H | -4.89442700 | 4.96786600  | 2.75687800  |
| C | -0.36083200 | 2.88467100  | 0.03317300  |
| C | 0.13452400  | 2.13213100  | 1.15890700  |
| N | -1.47686900 | 3.58642900  | 0.12314300  |
| N | -0.52557600 | 2.11341900  | 2.30012600  |
| P | 0.53060000  | 2.88922000  | -1.58461400 |
| P | 1.66770400  | 1.06287700  | 1.08393100  |
| C | -0.85986500 | 2.83000800  | -2.78543300 |
| H | -1.75286200 | 3.34051000  | -2.41367300 |
| H | -0.53409500 | 3.31077400  | -3.71263600 |
| H | -1.11361400 | 1.79707400  | -3.03613300 |
| C | 3.03387400  | 2.24549000  | 0.79722000  |
| H | 2.95575600  | 3.11559100  | 1.45338800  |
| H | 3.98471400  | 1.74226400  | 0.99460900  |
| H | 3.03715600  | 2.56974100  | -0.24409100 |
| C | 1.98785300  | 0.50735000  | 2.86764400  |
| C | 0.91042600  | -0.49274600 | 3.28614300  |
| C | 3.34656700  | -0.20112500 | 2.92687200  |
| C | 2.06171300  | 1.69665600  | 3.83008200  |
| H | -0.09396400 | -0.06263400 | 3.26838000  |
| H | 0.93253600  | -1.37501000 | 2.63721700  |
| H | 1.11486900  | -0.83445400 | 4.30767900  |
| H | 4.17415100  | 0.42236000  | 2.57460900  |
| H | 3.55353800  | -0.44036400 | 3.97625200  |
| H | 3.35307500  | -1.14130800 | 2.37600500  |
| H | 2.26570700  | 1.30536600  | 4.83395400  |
| H | 2.88764600  | 2.36894200  | 3.57705600  |
| H | 1.13879100  | 2.27395800  | 3.87823800  |
| C | 1.05161700  | 4.72452400  | -1.75648700 |
| C | -0.13603000 | 5.65123400  | -2.00608500 |
| C | 1.78342200  | 5.19712200  | -0.50320200 |
| C | 2.00780600  | 4.77049100  | -2.94969200 |
| H | -0.64097700 | 5.44382900  | -2.95366500 |
| H | -0.87808600 | 5.59375300  | -1.20446600 |
| H | 0.22690500  | 6.68575400  | -2.05346300 |

|    |             |             |             |
|----|-------------|-------------|-------------|
| H  | 2.70990100  | 4.64606300  | -0.32383200 |
| H  | 2.05641400  | 6.25202600  | -0.62614000 |
| H  | 1.16007600  | 5.12705600  | 0.39567300  |
| H  | 2.32438100  | 5.80413700  | -3.13486300 |
| H  | 2.90806400  | 4.17211400  | -2.76733100 |
| H  | 1.53856600  | 4.40548200  | -3.87130000 |
| Co | 1.46470500  | -0.41996300 | -0.80525300 |
| C  | 4.77971800  | -2.30704800 | 0.46918000  |
| C  | 3.87266400  | -3.26005200 | 1.00309300  |
| C  | 4.36554100  | -4.36235900 | 1.71059700  |
| C  | 5.73828000  | -4.50159300 | 1.86918000  |
| C  | 6.62036700  | -3.55349100 | 1.33626900  |
| C  | 6.15728700  | -2.44366800 | 0.63322100  |
| C  | 2.62280700  | -1.65008100 | 0.00134200  |
| C  | 2.53932300  | -2.82965600 | 0.69058900  |
| H  | 3.67816200  | -5.09428100 | 2.12610000  |
| H  | 6.13448300  | -5.35335100 | 2.41513800  |
| H  | 7.69055100  | -3.67617000 | 1.47465100  |
| H  | 6.87157600  | -1.72583900 | 0.25051800  |
| H  | -0.81604200 | 0.42854100  | -1.60107400 |
| H  | 1.63191300  | -3.34724500 | 0.97193600  |
| N  | 3.99169100  | -1.32526300 | -0.15301300 |
| C  | 4.30382600  | -0.31398200 | -1.03708000 |
| C  | 5.59177000  | 0.10143800  | -1.38840400 |
| N  | 3.20079400  | 0.25985300  | -1.57763400 |
| C  | 5.73407500  | 1.07155700  | -2.36576400 |
| H  | 6.46059300  | -0.33356100 | -0.91696400 |
| C  | 3.36007000  | 1.16483000  | -2.55990200 |
| C  | 4.60256900  | 1.59987300  | -2.98503200 |
| H  | 6.72812600  | 1.39893900  | -2.65423200 |
| H  | 2.44377600  | 1.54749900  | -2.99312400 |
| H  | 4.67505800  | 2.33254600  | -3.78055800 |
| C  | -4.23257200 | 0.74867500  | 1.35162800  |
| C  | -2.96724300 | 0.28515400  | 1.01127300  |
| C  | -2.53665500 | 0.28841200  | -0.32794300 |
| C  | -3.41485900 | 0.79125000  | -1.30601300 |
| C  | -4.68313200 | 1.24428200  | -0.96437000 |
| C  | -5.09608100 | 1.22770100  | 0.36781700  |
| H  | -4.53946800 | 0.74953700  | 2.39419300  |
| H  | -2.28698700 | -0.03679200 | 1.79685100  |
| H  | -3.08998300 | 0.81348200  | -2.34421500 |
| H  | -5.34888100 | 1.61959100  | -1.73723100 |
| H  | -6.08244300 | 1.59492800  | 0.63967400  |
| C  | -1.20111400 | -0.13584300 | -0.74614300 |

|   |             |             |             |
|---|-------------|-------------|-------------|
| C | -0.37971600 | -1.09753200 | -0.25167500 |
| C | -0.91838200 | -2.23978600 | 0.55356600  |
| H | -1.86110400 | -1.96274600 | 1.03842000  |
| H | -0.24245500 | -2.61221800 | 1.32766200  |
| N | -1.15013800 | -3.32148000 | -0.44632300 |
| C | -0.89951900 | -2.88539700 | -1.82299500 |
| H | -0.77528300 | -3.77730200 | -2.44643900 |
| H | -1.69444500 | -2.25401000 | -2.24714200 |
| C | 0.42902300  | -2.18422800 | -1.73741000 |
| C | 1.04504300  | -1.25619000 | -2.61257300 |
| H | 1.13455800  | -2.87936000 | -1.28538400 |
| H | 2.00772900  | -1.52116600 | -3.03998500 |
| H | 0.43054200  | -0.58630900 | -3.21911300 |
| S | -2.39488500 | -4.40094600 | -0.16749200 |
| O | -2.23884000 | -5.44902900 | -1.17288500 |
| O | -2.34144800 | -4.68927500 | 1.26285100  |
| C | -3.91538200 | -3.55270800 | -0.50075600 |
| C | -4.40320800 | -3.50337500 | -1.80894600 |
| C | -4.58937000 | -2.91229600 | 0.53878500  |
| C | -5.57479400 | -2.80482400 | -2.06809400 |
| H | -3.87927500 | -4.02303400 | -2.60610400 |
| C | -5.76368500 | -2.22270300 | 0.25974600  |
| H | -4.20668200 | -2.97143800 | 1.55400100  |
| C | -6.27237500 | -2.15307200 | -1.04175400 |
| H | -5.96043500 | -2.76392800 | -3.08417400 |
| H | -6.29481200 | -1.72369700 | 1.06656300  |
| C | -7.53440200 | -1.40620900 | -1.33336100 |
| H | -7.78194700 | -0.70493300 | -0.53209200 |
| H | -7.46107500 | -0.84662400 | -2.27083200 |
| H | -8.38328200 | -2.09108000 | -1.44208600 |

## M8R

|                                              |            |             |                             |
|----------------------------------------------|------------|-------------|-----------------------------|
| Zero-point correction=                       |            |             | 0.976489 (Hartree/Particle) |
| Thermal correction to Energy=                |            |             | 1.033843                    |
| Thermal correction to Enthalpy=              |            |             | 1.034788                    |
| Thermal correction to Gibbs Free Energy=     |            |             | 0.890478                    |
| Sum of electronic and zero-point Energies=   |            |             | -3589.317945                |
| Sum of electronic and thermal Energies=      |            |             | -3589.260591                |
| Sum of electronic and thermal Enthalpies=    |            |             | -3589.259647                |
| Sum of electronic and thermal Free Energies= |            |             | -3589.403956                |
| C                                            | 4.57449400 | -4.44628100 | 2.63466600                  |
| C                                            | 3.20496600 | -4.35159200 | 2.54986500                  |
| C                                            | 2.62013400 | -3.62572500 | 1.48769500                  |
| C                                            | 3.45872500 | -3.00414500 | 0.51044800                  |

|   |             |             |             |
|---|-------------|-------------|-------------|
| C | 4.86282900  | -3.11020300 | 0.62899700  |
| C | 5.40473200  | -3.82233400 | 1.67384700  |
| H | 5.03012700  | -5.00119100 | 3.44927000  |
| H | 2.54975100  | -4.81315200 | 3.28319800  |
| H | 5.48528600  | -2.63068200 | -0.12099100 |
| H | 6.48292300  | -3.91109500 | 1.76597400  |
| C | 1.59858900  | -2.22572500 | -0.58094400 |
| C | 0.75825700  | -2.80678700 | 0.42761700  |
| N | 2.91680700  | -2.30900400 | -0.52564900 |
| N | 1.26964700  | -3.50009600 | 1.42713100  |
| P | 0.81971200  | -1.29905500 | -1.97111300 |
| P | -1.06292400 | -2.47049800 | 0.37164900  |
| C | 2.01923100  | 0.04787700  | -2.27713800 |
| H | 2.97103100  | -0.33174100 | -2.65198000 |
| H | 1.59981800  | 0.73966200  | -3.01249400 |
| H | 2.21254900  | 0.59929900  | -1.35497000 |
| C | -1.74027600 | -3.85077100 | -0.62026900 |
| H | -1.30510300 | -4.81215400 | -0.33599600 |
| H | -2.82379100 | -3.89223200 | -0.47336000 |
| H | -1.55823700 | -3.67305600 | -1.68002500 |
| C | -1.74703400 | -2.81360700 | 2.09433000  |
| C | -1.03508000 | -1.90975500 | 3.09826200  |
| C | -3.23918700 | -2.46176500 | 2.07241600  |
| C | -1.61068000 | -4.28595400 | 2.48685300  |
| H | 0.02252300  | -2.16523500 | 3.21194900  |
| H | -1.11066800 | -0.85639700 | 2.80589400  |
| H | -1.51085800 | -2.01387400 | 4.08059800  |
| H | -3.79344500 | -3.00807100 | 1.30091500  |
| H | -3.67470500 | -2.74573100 | 3.03730100  |
| H | -3.41034500 | -1.39194200 | 1.93722300  |
| H | -2.01173100 | -4.41052500 | 3.50002000  |
| H | -2.19439600 | -4.93797800 | 1.82915300  |
| H | -0.57389700 | -4.62497000 | 2.48880000  |
| C | 1.13293900  | -2.39935100 | -3.50776500 |
| C | 2.58885200  | -2.86384300 | -3.57112300 |
| C | 0.26154100  | -3.65168300 | -3.49354700 |
| C | 0.82388200  | -1.53889000 | -4.73555200 |
| H | 3.31631100  | -2.04898100 | -3.54095000 |
| H | 2.83161100  | -3.56703500 | -2.77059100 |
| H | 2.72948000  | -3.38686500 | -4.52453800 |
| H | -0.80783700 | -3.44442700 | -3.58252200 |
| H | 0.53333300  | -4.27687300 | -4.35145000 |
| H | 0.42695900  | -4.24909900 | -2.59059400 |
| H | 0.89760300  | -2.16126200 | -5.63434500 |

|    |             |             |             |
|----|-------------|-------------|-------------|
| H  | -0.18302000 | -1.10683700 | -4.71886300 |
| H  | 1.53749100  | -0.71751800 | -4.84845900 |
| Co | -1.21515800 | -0.39824900 | -0.80604800 |
| C  | -4.79057500 | 0.75253800  | 0.65941700  |
| C  | -4.04751100 | 1.32413300  | 1.72669700  |
| C  | -4.72568700 | 1.97793100  | 2.76160300  |
| C  | -6.11270100 | 2.05257000  | 2.71946200  |
| C  | -6.82943700 | 1.48054300  | 1.66161400  |
| C  | -6.18095700 | 0.82205600  | 0.61785600  |
| C  | -2.53766800 | 0.36939600  | 0.31332100  |
| C  | -2.65395400 | 1.07420900  | 1.48156400  |
| H  | -4.16974400 | 2.42135100  | 3.58381100  |
| H  | -6.64900600 | 2.55892100  | 3.51709300  |
| H  | -7.91340400 | 1.54603600  | 1.64758200  |
| H  | -6.76869100 | 0.38568200  | -0.18063200 |
| H  | -1.83891400 | 1.35394600  | 2.13545600  |
| N  | -3.84215200 | 0.17628500  | -0.19867000 |
| C  | -3.93980500 | -0.47730800 | -1.39909400 |
| C  | -5.11144600 | -0.76955100 | -2.10402600 |
| N  | -2.72188300 | -0.84238000 | -1.88784100 |
| C  | -5.01855400 | -1.41904500 | -3.32258800 |
| H  | -6.07396500 | -0.48312300 | -1.70490500 |
| C  | -2.64884300 | -1.44847800 | -3.08420900 |
| C  | -3.76656500 | -1.76350400 | -3.83214700 |
| H  | -5.92263300 | -1.64761800 | -3.87782000 |
| H  | -1.64639700 | -1.67575700 | -3.42349400 |
| H  | -3.64956300 | -2.25800200 | -4.78919800 |
| C  | 1.09511600  | 1.14582200  | 4.71066800  |
| C  | 0.63820800  | 1.45654700  | 3.43351200  |
| C  | 1.18164200  | 0.81768000  | 2.30520200  |
| C  | 2.19375200  | -0.13840900 | 2.50931900  |
| C  | 2.65842000  | -0.43742100 | 3.78306400  |
| C  | 2.10522100  | 0.20241000  | 4.89238500  |
| H  | 0.65347200  | 1.64079700  | 5.57125800  |
| H  | -0.16883400 | 2.17556700  | 3.31990700  |
| H  | 2.62089900  | -0.63741300 | 1.63935700  |
| H  | 3.44931900  | -1.17234800 | 3.91167000  |
| H  | 2.45630600  | -0.03492900 | 5.89267900  |
| C  | 0.75014800  | 1.06185000  | 0.93398800  |
| C  | 0.17648200  | 2.15681600  | 0.38969200  |
| C  | -0.07362600 | 3.46033400  | 1.09642900  |
| H  | 0.67581800  | 3.71123200  | 1.85369600  |
| H  | -1.05161700 | 3.46184500  | 1.59975300  |
| N  | -0.11929600 | 4.47922200  | 0.03087600  |

|   |             |            |             |
|---|-------------|------------|-------------|
| C | -0.66757600 | 3.78815900 | -1.14550800 |
| H | -1.76054700 | 3.79603200 | -1.04463000 |
| H | -0.41235900 | 4.32255000 | -2.06274400 |
| C | -0.14240100 | 2.33772900 | -1.09029700 |
| C | -1.08569800 | 1.34371100 | -1.76555600 |
| H | 0.82649200  | 2.32180700 | -1.60648000 |
| H | -0.77377500 | 1.13893900 | -2.79796200 |
| H | -2.10114300 | 1.75493100 | -1.80044200 |
| S | 1.28907500  | 5.38953900 | -0.18476400 |
| O | 1.02032300  | 6.25544200 | -1.32909800 |
| O | 1.59698700  | 5.93157600 | 1.13611700  |
| C | 2.59764100  | 4.27436900 | -0.63163000 |
| C | 2.86637900  | 4.02979500 | -1.97810300 |
| C | 3.27556700  | 3.57877500 | 0.37233800  |
| C | 3.81172300  | 3.06734400 | -2.31581300 |
| H | 2.34101500  | 4.58940700 | -2.74676000 |
| C | 4.21096800  | 2.61685500 | 0.01611600  |
| H | 3.07119600  | 3.79428100 | 1.41767900  |
| C | 4.48459200  | 2.33575800 | -1.32965300 |
| H | 4.02608300  | 2.86949800 | -3.36385400 |
| H | 4.73938400  | 2.06981400 | 0.79363900  |
| C | 5.45143900  | 1.25477100 | -1.69193900 |
| H | 5.11518900  | 0.28607900 | -1.30162300 |
| H | 5.56637600  | 1.15842200 | -2.77429700 |
| H | 6.44094300  | 1.43812400 | -1.26061800 |
| H | 1.01399400  | 0.24585900 | 0.25405100  |

## M8S

|                                              |            |             |                             |
|----------------------------------------------|------------|-------------|-----------------------------|
| Zero-point correction=                       |            |             | 0.974387 (Hartree/Particle) |
| Thermal correction to Energy=                |            |             | 1.032012                    |
| Thermal correction to Enthalpy=              |            |             | 1.032956                    |
| Thermal correction to Gibbs Free Energy=     |            |             | 0.885282                    |
| Sum of electronic and zero-point Energies=   |            |             | -3589.308576                |
| Sum of electronic and thermal Energies=      |            |             | -3589.250951                |
| Sum of electronic and thermal Enthalpies=    |            |             | -3589.250007                |
| Sum of electronic and thermal Free Energies= |            |             | -3589.397680                |
| C                                            | 4.83319200 | -5.25403000 | -2.30593600                 |
| C                                            | 4.64736700 | -3.90154300 | -2.47292100                 |
| C                                            | 4.09791500 | -3.13849500 | -1.41798500                 |
| C                                            | 3.74296000 | -3.78188800 | -0.19203500                 |
| C                                            | 3.94123000 | -5.17386500 | -0.05035200                 |
| C                                            | 4.47915000 | -5.89137600 | -1.09291300                 |
| H                                            | 5.25505500 | -5.84583500 | -3.11287800                 |
| H                                            | 4.90706100 | -3.39453200 | -3.39802500                 |

|    |             |             |             |
|----|-------------|-------------|-------------|
| H  | 3.65975000  | -5.64528100 | 0.88698500  |
| H  | 4.63459300  | -6.96114800 | -0.99046600 |
| C  | 2.99708300  | -1.77758300 | 0.63889300  |
| C  | 3.35363000  | -1.13233100 | -0.59003900 |
| N  | 3.19003200  | -3.07095200 | 0.82443100  |
| N  | 3.89378000  | -1.80695900 | -1.58738100 |
| P  | 2.12191800  | -0.81645000 | 1.95323600  |
| P  | 2.96130300  | 0.66309900  | -0.78822500 |
| C  | 0.85672300  | -2.03072200 | 2.48191500  |
| H  | 1.28660600  | -3.03481600 | 2.47817500  |
| H  | 0.50329400  | -1.79405400 | 3.48880400  |
| H  | -0.00573600 | -2.01789900 | 1.81293500  |
| C  | 4.47808400  | 1.44358000  | -0.12925000 |
| H  | 5.37311300  | 1.01965000  | -0.59235000 |
| H  | 4.45607600  | 2.52199000  | -0.31207200 |
| H  | 4.53511200  | 1.27944400  | 0.94796600  |
| C  | 3.01095300  | 1.04839800  | -2.62944200 |
| C  | 1.96621100  | 0.17990000  | -3.33003900 |
| C  | 2.64528400  | 2.52808400  | -2.79224500 |
| C  | 4.39689900  | 0.83731900  | -3.24082800 |
| H  | 2.23766800  | -0.87982500 | -3.31738600 |
| H  | 0.97640300  | 0.29054400  | -2.87058300 |
| H  | 1.88023200  | 0.49088000  | -4.37774600 |
| H  | 3.32010500  | 3.18875800  | -2.23589800 |
| H  | 2.73880700  | 2.79429600  | -3.85152300 |
| H  | 1.61773600  | 2.73810200  | -2.49104600 |
| H  | 4.33538600  | 1.05722200  | -4.31351500 |
| H  | 5.13549100  | 1.52421000  | -2.81533000 |
| H  | 4.75727600  | -0.18544200 | -3.12369900 |
| C  | 3.29854800  | -0.84643000 | 3.46391900  |
| C  | 3.56450200  | -2.28737500 | 3.90510800  |
| C  | 4.64180800  | -0.20078500 | 3.12667200  |
| C  | 2.61095900  | -0.10846900 | 4.61462600  |
| H  | 2.65901900  | -2.80306900 | 4.23346400  |
| H  | 4.03919700  | -2.88591700 | 3.12414400  |
| H  | 4.24665800  | -2.25484300 | 4.76293100  |
| H  | 4.58318800  | 0.88129100  | 2.98398600  |
| H  | 5.32958500  | -0.36581000 | 3.96337200  |
| H  | 5.10335800  | -0.64125100 | 2.23555800  |
| H  | 3.28499300  | -0.09610500 | 5.47868600  |
| H  | 2.35698200  | 0.92993600  | 4.38448000  |
| H  | 1.69195800  | -0.61168300 | 4.93039900  |
| Co | 1.05348300  | 1.01787100  | 0.64508300  |
| C  | -0.26644300 | 4.36904000  | -1.19755600 |



|   |             |             |             |
|---|-------------|-------------|-------------|
| C | -1.01503100 | 3.49052700  | -2.02497000 |
| C | -1.80812000 | 4.02132600  | -3.04912500 |
| C | -1.84620100 | 5.39832100  | -3.22958600 |
| C | -1.10642700 | 6.25056700  | -2.40075700 |
| C | -0.30718800 | 5.75045100  | -1.37412700 |
| C | 0.11561000  | 2.18399000  | -0.53600100 |
| C | -0.76348200 | 2.14658800  | -1.58801900 |
| H | -2.38431300 | 3.36011900  | -3.69130300 |
| H | -2.45811800 | 5.82160700  | -4.02162300 |
| H | -1.15095700 | 7.32468000  | -2.55525600 |
| H | 0.24882700  | 6.44096500  | -0.75228100 |
| H | 0.22321500  | -0.64444400 | 0.19984300  |
| H | -1.18448900 | 1.25493300  | -2.03347400 |
| N | 0.41873300  | 3.54536600  | -0.29257600 |
| C | 1.31391100  | 3.80731700  | 0.71050800  |
| C | 1.76770600  | 5.06540200  | 1.12119100  |
| N | 1.76831700  | 2.67302100  | 1.31052100  |
| C | 2.67941500  | 5.14802800  | 2.15870000  |
| H | 1.40662600  | 5.96050800  | 0.63565500  |
| C | 2.64290900  | 2.77413700  | 2.32316100  |
| C | 3.13014000  | 3.98333000  | 2.77919700  |
| H | 3.03390000  | 6.12093400  | 2.48381300  |
| H | 2.95017400  | 1.83299300  | 2.75668100  |
| H | 3.83805000  | 4.00229900  | 3.59963300  |
| C | -1.64724000 | -2.36791500 | -3.58059400 |
| C | -1.68620300 | -1.53504000 | -2.46812400 |
| C | -0.73757700 | -1.66700600 | -1.43984700 |
| C | 0.25610000  | -2.65152700 | -1.56981000 |
| C | 0.29159600  | -3.48511000 | -2.68122800 |
| C | -0.65896700 | -3.34378300 | -3.69283300 |
| H | -2.38538300 | -2.24622800 | -4.36830800 |
| H | -2.43919800 | -0.75321300 | -2.40655400 |
| H | 0.99315000  | -2.76674700 | -0.77829600 |
| H | 1.06306800  | -4.24733200 | -2.76002600 |
| H | -0.62733200 | -3.98969200 | -4.56546200 |
| C | -0.76550200 | -0.77712800 | -0.28482400 |
| C | -1.82650400 | -0.19453000 | 0.29901200  |
| C | -3.27032300 | -0.50102400 | 0.06310200  |
| H | -3.43346200 | -1.55318800 | -0.19942600 |
| H | -3.70389500 | 0.11373100  | -0.73828200 |
| N | -3.92035300 | -0.13218600 | 1.35399700  |
| C | -2.89570700 | 0.37992200  | 2.30400200  |
| H | -3.32116100 | 1.17762300  | 2.91618200  |
| H | -2.52014200 | -0.41060500 | 2.97174400  |

|   |              |             |             |
|---|--------------|-------------|-------------|
| C | -1.77536200  | 0.84280400  | 1.37229700  |
| C | -0.42604600  | 1.10880700  | 2.00333300  |
| H | -2.11765300  | 1.76717400  | 0.87840500  |
| H | -0.40674800  | 2.10047200  | 2.46691000  |
| H | -0.21506600  | 0.37263300  | 2.78806800  |
| S | -4.92045400  | -1.31722300 | 2.01406900  |
| O | -4.31226900  | -2.64951000 | 1.91141800  |
| O | -5.30717400  | -0.80149500 | 3.32642200  |
| C | -6.31017100  | -1.26848500 | 0.91744700  |
| C | -6.46330700  | -2.25753800 | -0.05267400 |
| C | -7.24092400  | -0.23930900 | 1.05131200  |
| C | -7.56276500  | -2.20588300 | -0.90039200 |
| H | -5.73146000  | -3.05610100 | -0.13026900 |
| C | -8.33654300  | -0.20714200 | 0.19840400  |
| H | -7.10891800  | 0.51904100  | 1.81764500  |
| C | -8.51655700  | -1.18615900 | -0.78731200 |
| H | -7.68926800  | -2.97316600 | -1.66032500 |
| H | -9.07030000  | 0.58909100  | 0.29775400  |
| C | -9.70807400  | -1.15941700 | -1.69040500 |
| H | -10.22629800 | -0.19850900 | -1.64912500 |
| H | -9.42969700  | -1.35695000 | -2.72985500 |
| H | -10.43055700 | -1.93385400 | -1.40877300 |

### TS7R

|                                              |             |             |                             |
|----------------------------------------------|-------------|-------------|-----------------------------|
| Zero-point correction=                       |             |             | 0.973654 (Hartree/Particle) |
| Thermal correction to Energy=                |             |             | 1.031309                    |
| Thermal correction to Enthalpy=              |             |             | 1.032253                    |
| Thermal correction to Gibbs Free Energy=     |             |             | 0.884715                    |
| Sum of electronic and zero-point Energies=   |             |             | -3589.306472                |
| Sum of electronic and thermal Energies=      |             |             | -3589.248818                |
| Sum of electronic and thermal Enthalpies=    |             |             | -3589.247873                |
| Sum of electronic and thermal Free Energies= |             |             | -3589.395411                |
| Imaginary frequency=-296.24 cm <sup>-1</sup> |             |             |                             |
| C                                            | -8.71279100 | -2.15675600 | 1.83620000                  |
| C                                            | -8.11805000 | -1.32428200 | 0.91808200                  |
| C                                            | -6.70964600 | -1.29651900 | 0.80625600                  |
| C                                            | -5.91819000 | -2.15920000 | 1.63516900                  |
| C                                            | -6.55952700 | -2.99586500 | 2.57647900                  |
| C                                            | -7.93143800 | -2.99026700 | 2.67105500                  |
| H                                            | -9.79445800 | -2.17508400 | 1.92944700                  |
| H                                            | -8.69969600 | -0.66759800 | 0.27768000                  |
| H                                            | -5.94444100 | -3.63829200 | 3.19967700                  |
| H                                            | -8.42620800 | -3.63596300 | 3.39052000                  |
| C                                            | -4.03297900 | -1.39627900 | 0.60741400                  |

|    |             |             |             |
|----|-------------|-------------|-------------|
| C  | -4.80496300 | -0.44423100 | -0.11159300 |
| N  | -4.56639100 | -2.21703900 | 1.49294300  |
| N  | -6.12350100 | -0.42045900 | -0.05289000 |
| P  | -2.26451700 | -1.53021100 | 0.13977200  |
| P  | -3.85666200 | 0.85267000  | -0.99351300 |
| C  | -1.51530200 | -2.14622200 | 1.68141200  |
| H  | -1.94461300 | -3.11568300 | 1.94943300  |
| H  | -0.43163500 | -2.24603500 | 1.59232200  |
| H  | -1.73794200 | -1.44132300 | 2.48682000  |
| C  | -4.80394400 | 1.09823800  | -2.53406700 |
| H  | -5.87547400 | 1.07743200  | -2.31802500 |
| H  | -4.55006600 | 2.05840600  | -2.99118500 |
| H  | -4.57296700 | 0.29994700  | -3.24439800 |
| C  | -4.27169500 | 2.38116200  | 0.05603000  |
| C  | -3.99006600 | 2.04318200  | 1.51957200  |
| C  | -3.37154000 | 3.53375700  | -0.38357000 |
| C  | -5.73442400 | 2.78389000  | -0.12021700 |
| H  | -4.70041500 | 1.31162600  | 1.92030000  |
| H  | -2.97361000 | 1.65365100  | 1.65854800  |
| H  | -4.08131200 | 2.95274000  | 2.12405600  |
| H  | -3.38276000 | 3.69190900  | -1.46872200 |
| H  | -3.72310800 | 4.45961000  | 0.08606300  |
| H  | -2.34015300 | 3.37644000  | -0.06078800 |
| H  | -5.95219600 | 3.60857600  | 0.56894200  |
| H  | -5.94279700 | 3.14168300  | -1.13321800 |
| H  | -6.42556500 | 1.96708200  | 0.10551800  |
| C  | -2.30408400 | -3.00275000 | -1.06320500 |
| C  | -3.23182400 | -4.11595700 | -0.58441400 |
| C  | -2.78825600 | -2.45892200 | -2.40883500 |
| C  | -0.88912100 | -3.55326700 | -1.22053700 |
| H  | -2.98086200 | -4.47357500 | 0.41929400  |
| H  | -4.28179200 | -3.81244600 | -0.58345000 |
| H  | -3.13592900 | -4.96714000 | -1.26852300 |
| H  | -2.13058400 | -1.65505200 | -2.77147000 |
| H  | -2.78603500 | -3.25992300 | -3.15757900 |
| H  | -3.81102500 | -2.06530500 | -2.35112200 |
| H  | -0.91751500 | -4.42386900 | -1.88542300 |
| H  | -0.21819400 | -2.82443200 | -1.68052600 |
| H  | -0.45202600 | -3.88025900 | -0.27121100 |
| Co | -1.66981700 | 0.28037500  | -1.02967900 |
| C  | 0.45216500  | 3.19221600  | 0.68473500  |
| C  | 0.38930000  | 2.36696300  | 1.84193800  |
| C  | 0.87508800  | 2.85880900  | 3.06005600  |
| C  | 1.38968500  | 4.14871700  | 3.11157200  |

|   |             |             |             |
|---|-------------|-------------|-------------|
| C | 1.41278000  | 4.95818100  | 1.96944000  |
| C | 0.94106600  | 4.49341100  | 0.74061300  |
| C | -0.47933800 | 1.14873400  | 0.11801300  |
| C | -0.17871500 | 1.11263700  | 1.46311000  |
| H | 0.85486700  | 2.23072900  | 3.94737600  |
| H | 1.77532900  | 4.53722800  | 4.04997700  |
| H | 1.80725200  | 5.96815000  | 2.03240000  |
| H | 0.96714800  | 5.14652500  | -0.12329000 |
| H | -0.30366400 | 0.25427800  | 2.10776700  |
| N | -0.07403300 | 2.43143200  | -0.36658600 |
| C | -0.43155200 | 2.74827800  | -1.65681600 |
| C | -0.01771000 | 3.86625100  | -2.38679400 |
| N | -1.25708600 | 1.81561200  | -2.20321800 |
| C | -0.46409200 | 4.00950900  | -3.69019300 |
| H | 0.66119400  | 4.58826600  | -1.95458100 |
| C | -1.65240700 | 1.95363600  | -3.48090600 |
| C | -1.29059700 | 3.03853200  | -4.25829700 |
| H | -0.15333100 | 4.87304500  | -4.26980500 |
| H | -2.28818000 | 1.15938900  | -3.86425000 |
| H | -1.64164200 | 3.11483500  | -5.28057700 |
| C | 5.47097500  | 1.66474900  | 2.85618600  |
| C | 4.38369000  | 1.27522000  | 2.07919700  |
| C | 3.61562200  | 0.15224100  | 2.43164000  |
| C | 3.94452300  | -0.53356500 | 3.61342900  |
| C | 5.03422100  | -0.14798100 | 4.38471900  |
| C | 5.80796000  | 0.94852700  | 4.00393900  |
| H | 6.05161100  | 2.53784300  | 2.57032500  |
| H | 4.09970600  | 1.86224600  | 1.20767900  |
| H | 3.34686000  | -1.39438500 | 3.90611100  |
| H | 5.28175700  | -0.70370800 | 5.28532300  |
| H | 6.65844700  | 1.25279900  | 4.60772700  |
| C | 2.51021500  | -0.34564000 | 1.61771300  |
| C | 2.44435500  | -0.37063600 | 0.27781000  |
| C | 3.56820100  | -0.09196500 | -0.66914700 |
| H | 4.53465600  | 0.08537200  | -0.19300100 |
| H | 3.36844300  | 0.76128900  | -1.33236500 |
| N | 3.60735900  | -1.30606700 | -1.52607800 |
| C | 2.18902200  | -1.73472400 | -1.66802500 |
| H | 1.84213700  | -1.40775800 | -2.65485800 |
| H | 2.11519100  | -2.82552800 | -1.64726100 |
| C | 1.36343100  | -1.05441300 | -0.52772800 |
| C | 0.34185200  | -0.13244200 | -1.19376100 |
| H | 0.85923000  | -1.81236900 | 0.08038400  |
| H | -0.22159900 | -0.72067800 | -1.95910600 |

|   |             |             |             |
|---|-------------|-------------|-------------|
| H | 0.87116900  | 0.64313600  | -1.75540300 |
| S | 4.57538200  | -2.56708100 | -0.89316900 |
| O | 4.21971200  | -2.91658800 | 0.48681200  |
| O | 4.53430200  | -3.61400500 | -1.91527300 |
| C | 6.16633000  | -1.78911700 | -0.87712200 |
| C | 6.71444600  | -1.38537700 | 0.33791900  |
| C | 6.84270200  | -1.58303400 | -2.08048800 |
| C | 7.95580400  | -0.75821200 | 0.34186300  |
| H | 6.16931200  | -1.55415100 | 1.26277700  |
| C | 8.08101900  | -0.95808900 | -2.05560900 |
| H | 6.40415000  | -1.91317100 | -3.01787100 |
| C | 8.65447700  | -0.53058500 | -0.84838100 |
| H | 8.38778300  | -0.43385500 | 1.28561400  |
| H | 8.61711300  | -0.79407400 | -2.98752500 |
| C | 9.98528200  | 0.15072800  | -0.84306800 |
| H | 9.96802800  | 1.06169200  | -1.45060200 |
| H | 10.29423100 | 0.42614000  | 0.16800800  |
| H | 10.76247100 | -0.49171700 | -1.27025900 |
| H | 1.69205400  | -0.80964200 | 2.17021700  |

#### TS7S

|                                              |             |             |                             |
|----------------------------------------------|-------------|-------------|-----------------------------|
| Zero-point correction=                       |             |             | 0.972487 (Hartree/Particle) |
| Thermal correction to Energy=                |             |             | 1.030545                    |
| Thermal correction to Enthalpy=              |             |             | 1.031489                    |
| Thermal correction to Gibbs Free Energy=     |             |             | 0.881931                    |
| Sum of electronic and zero-point Energies=   |             |             | -3589.321347                |
| Sum of electronic and thermal Energies=      |             |             | -3589.263289                |
| Sum of electronic and thermal Enthalpies=    |             |             | -3589.262344                |
| Sum of electronic and thermal Free Energies= |             |             | -3589.411903                |
| Imaginary frequency=-323.09 cm <sup>-1</sup> |             |             |                             |
| C                                            | -7.70522700 | -4.00122900 | -0.62332000                 |
| C                                            | -6.95376700 | -3.09679700 | -1.33642600                 |
| C                                            | -5.75083600 | -2.59719100 | -0.78796500                 |
| C                                            | -5.31950600 | -3.06078900 | 0.49860700                  |
| C                                            | -6.11923100 | -3.98239600 | 1.21118000                  |
| C                                            | -7.28937100 | -4.44231300 | 0.65536500                  |
| H                                            | -8.63300700 | -4.38128500 | -1.04040500                 |
| H                                            | -7.26473400 | -2.73803700 | -2.31346500                 |
| H                                            | -5.77471400 | -4.31858600 | 2.18472400                  |
| H                                            | -7.90251400 | -5.15645600 | 1.19707500                  |
| C                                            | -3.43493800 | -1.79595300 | 0.31020800                  |
| C                                            | -3.92768700 | -1.22924500 | -0.89740800                 |
| N                                            | -4.12834300 | -2.66538300 | 1.02077000                  |
| N                                            | -5.04448500 | -1.64973300 | -1.46306100                 |

|    |             |             |             |
|----|-------------|-------------|-------------|
| P  | -1.71528800 | -1.37382900 | 0.76229500  |
| P  | -3.01624300 | 0.24000300  | -1.51525100 |
| C  | -1.70466100 | -1.55531300 | 2.57176900  |
| H  | -1.93497800 | -2.58879400 | 2.84595900  |
| H  | -0.72833700 | -1.28621900 | 2.98441500  |
| H  | -2.46683600 | -0.90250600 | 3.00466400  |
| C  | -3.05290300 | 0.04385500  | -3.32768800 |
| H  | -4.03942600 | -0.30018400 | -3.65029700 |
| H  | -2.82916100 | 0.99566100  | -3.81716100 |
| H  | -2.30672100 | -0.69084000 | -3.64099600 |
| C  | -4.26522900 | 1.62390100  | -1.16614200 |
| C  | -4.65671800 | 1.54578900  | 0.30954200  |
| C  | -3.58804100 | 2.96500900  | -1.44339300 |
| C  | -5.50501800 | 1.49038900  | -2.04820600 |
| H  | -5.25692600 | 0.65682100  | 0.53325700  |
| H  | -3.77620400 | 1.54386300  | 0.96485100  |
| H  | -5.26113300 | 2.42173800  | 0.57110400  |
| H  | -3.11092500 | 3.00689200  | -2.43026300 |
| H  | -4.34329700 | 3.75864500  | -1.41173800 |
| H  | -2.84057400 | 3.19501500  | -0.68156700 |
| H  | -6.22890500 | 2.25615400  | -1.74464400 |
| H  | -5.27924000 | 1.65940600  | -3.10576200 |
| H  | -5.98988800 | 0.51524100  | -1.95086600 |
| C  | -0.74536500 | -2.86969300 | 0.10788400  |
| C  | -1.54722100 | -4.16346000 | 0.23073400  |
| C  | -0.44389500 | -2.58924400 | -1.36422600 |
| C  | 0.54479500  | -3.01115300 | 0.91519300  |
| H  | -1.91259200 | -4.33682800 | 1.24841800  |
| H  | -2.40744000 | -4.18588200 | -0.44537400 |
| H  | -0.89645100 | -5.00476900 | -0.03510200 |
| H  | 0.15783500  | -1.68022900 | -1.49514100 |
| H  | 0.12605400  | -3.42111800 | -1.79551100 |
| H  | -1.36843700 | -2.48506300 | -1.94686400 |
| H  | 1.14545400  | -3.81496300 | 0.47416600  |
| H  | 1.16468000  | -2.11223500 | 0.90347600  |
| H  | 0.34079100  | -3.28594000 | 1.95537400  |
| Co | -1.06016200 | 0.43521400  | -0.37575400 |
| C  | -0.88797500 | 3.99302500  | 1.41385900  |
| C  | -1.24229800 | 3.29371300  | 2.60141900  |
| C  | -1.55620700 | 4.02668000  | 3.75420400  |
| C  | -1.53038700 | 5.41521800  | 3.70190100  |
| C  | -1.21246400 | 6.08477800  | 2.51430500  |
| C  | -0.89243200 | 5.38252500  | 1.35148400  |
| C  | -0.90190000 | 1.71766000  | 0.97849600  |

|   |             |             |             |
|---|-------------|-------------|-------------|
| C | -1.21248100 | 1.89483000  | 2.31505100  |
| H | -1.82362200 | 3.50932900  | 4.67212300  |
| H | -1.77177400 | 5.99100800  | 4.59124300  |
| H | -1.21444000 | 7.17054900  | 2.48965000  |
| H | -0.67104600 | 5.92661200  | 0.44101200  |
| H | -1.38799100 | 1.09887100  | 3.02622500  |
| N | -0.64628500 | 3.01454200  | 0.44094000  |
| C | -0.32724100 | 3.09979600  | -0.89474100 |
| C | 0.13891500  | 4.23105000  | -1.56935000 |
| N | -0.47532900 | 1.90933300  | -1.52985200 |
| C | 0.44497800  | 4.11759300  | -2.91652600 |
| H | 0.29426500  | 5.16442600  | -1.04532600 |
| C | -0.15640400 | 1.81198800  | -2.83241800 |
| C | 0.29978500  | 2.89143800  | -3.56690600 |
| H | 0.81251500  | 4.98538900  | -3.45549400 |
| H | -0.27354500 | 0.82602000  | -3.27211300 |
| H | 0.54533400  | 2.76871900  | -4.61520500 |
| C | 5.83364300  | -1.69770600 | 4.24800500  |
| C | 5.06869800  | -0.84828100 | 3.45515900  |
| C | 3.68446700  | -0.71407600 | 3.67150400  |
| C | 3.11186000  | -1.44928300 | 4.72660700  |
| C | 3.87636400  | -2.30044900 | 5.51391100  |
| C | 5.24386400  | -2.43172200 | 5.27554200  |
| H | 6.90205100  | -1.77980000 | 4.06613500  |
| H | 5.56156100  | -0.26309900 | 2.68517200  |
| H | 2.04434300  | -1.34677900 | 4.91526400  |
| H | 3.40535800  | -2.86028200 | 6.31748600  |
| H | 5.84699000  | -3.09241300 | 5.89183800  |
| C | 2.80266700  | 0.12982900  | 2.87559400  |
| C | 2.98078000  | 0.64481800  | 1.64507600  |
| C | 4.17204900  | 0.49653600  | 0.74128000  |
| H | 4.58174800  | -0.51977200 | 0.72441900  |
| H | 4.99262600  | 1.16590600  | 1.03435700  |
| N | 3.71137500  | 0.90996700  | -0.60006300 |
| C | 2.61045500  | 1.87062500  | -0.37245700 |
| H | 3.07273000  | 2.85360400  | -0.23029400 |
| H | 1.99019700  | 1.91868200  | -1.26539400 |
| C | 1.89371700  | 1.42615000  | 0.91192900  |
| C | 0.68727100  | 0.50010000  | 0.72367100  |
| H | 0.55390600  | -0.07413800 | 1.63848700  |
| H | 0.91271300  | -0.21186300 | -0.09723600 |
| S | 3.36304200  | -0.37526600 | -1.64862800 |
| O | 2.76410600  | -1.52739100 | -0.95965800 |
| O | 2.64619500  | 0.22360200  | -2.77821400 |

|   |            |             |             |
|---|------------|-------------|-------------|
| C | 4.99586300 | -0.85831600 | -2.14076500 |
| C | 5.48247800 | -2.09779600 | -1.73701200 |
| C | 5.75944100 | -0.00882800 | -2.94436100 |
| C | 6.75394300 | -2.48959000 | -2.14444700 |
| H | 4.86931300 | -2.74324100 | -1.11625700 |
| C | 7.02287600 | -0.41860700 | -3.34319900 |
| H | 5.36534100 | 0.95568500  | -3.25240500 |
| C | 7.54160500 | -1.66233100 | -2.95011400 |
| H | 7.14106200 | -3.45645000 | -1.83226800 |
| H | 7.62395100 | 0.23383100  | -3.97204000 |
| C | 8.90801900 | -2.08270700 | -3.38688600 |
| H | 9.67397500 | -1.40333500 | -2.99765100 |
| H | 9.14994900 | -3.09183300 | -3.04539900 |
| H | 9.00138600 | -2.06213700 | -4.47751300 |
| H | 1.83129300 | 0.31943500  | 3.33911600  |
| H | 1.60040600 | 2.30069700  | 1.50617000  |

#### TS5R'

|                                              |             |            |                             |
|----------------------------------------------|-------------|------------|-----------------------------|
| Zero-point correction=                       |             |            | 0.966653 (Hartree/Particle) |
| Thermal correction to Energy=                |             |            | 1.025953                    |
| Thermal correction to Enthalpy=              |             |            | 1.026897                    |
| Thermal correction to Gibbs Free Energy=     |             |            | 0.875138                    |
| Sum of electronic and zero-point Energies=   |             |            | -3589.209919                |
| Sum of electronic and thermal Energies=      |             |            | -3589.150619                |
| Sum of electronic and thermal Enthalpies=    |             |            | -3589.149674                |
| Sum of electronic and thermal Free Energies= |             |            | -3589.301434                |
| Imaginary frequency=-299.29 cm <sup>-1</sup> |             |            |                             |
| C                                            | -1.43503800 | 7.37997500 | -1.66985200                 |
| C                                            | -2.24227900 | 6.33362300 | -1.29028700                 |
| C                                            | -1.66493500 | 5.08182800 | -0.97985600                 |
| C                                            | -0.24097900 | 4.92762300 | -1.03765300                 |
| C                                            | 0.56070600  | 6.01893100 | -1.44169700                 |
| C                                            | -0.03135900 | 7.22068600 | -1.75147700                 |
| H                                            | -1.87609300 | 8.34104800 | -1.91712900                 |
| H                                            | -3.32246900 | 6.43211200 | -1.23597200                 |
| H                                            | 1.63711500  | 5.88116500 | -1.48465300                 |
| H                                            | 0.58181000  | 8.06295200 | -2.05726600                 |
| C                                            | -0.45652500 | 2.77747600 | -0.30860400                 |
| C                                            | -1.87270500 | 2.88660700 | -0.39334800                 |
| N                                            | 0.34866900  | 3.76145500 | -0.66020800                 |
| N                                            | -2.47020500 | 4.02798700 | -0.67917700                 |
| P                                            | 0.20758100  | 1.24684900 | 0.45539800                  |
| P                                            | -2.81388100 | 1.31162300 | -0.32004700                 |
| C                                            | 1.80310700  | 1.00554900 | -0.36475800                 |



|    |             |             |             |
|----|-------------|-------------|-------------|
| H  | 2.29519100  | 1.97299500  | -0.50170200 |
| H  | 2.43465400  | 0.32805200  | 0.21578000  |
| H  | 1.62269300  | 0.54520700  | -1.34036000 |
| C  | -4.38663300 | 1.73540400  | 0.48443700  |
| H  | -4.76010800 | 2.69307100  | 0.11251400  |
| H  | -5.12717300 | 0.95414600  | 0.29066000  |
| H  | -4.23922900 | 1.80562600  | 1.56520800  |
| C  | -3.20818400 | 1.11548300  | -2.16377300 |
| C  | -1.90838100 | 1.24465800  | -2.95877200 |
| C  | -3.80475300 | -0.26745400 | -2.37767600 |
| C  | -4.21113300 | 2.17367100  | -2.62029500 |
| H  | -1.51240600 | 2.26580300  | -2.95013800 |
| H  | -1.12752000 | 0.56708900  | -2.58881000 |
| H  | -2.10262600 | 0.97903200  | -4.00383200 |
| H  | -4.67173500 | -0.44943000 | -1.73473200 |
| H  | -4.13854500 | -0.36317400 | -3.41757100 |
| H  | -3.06391000 | -1.04988600 | -2.19254000 |
| H  | -4.34701500 | 2.07509500  | -3.70363800 |
| H  | -5.19197100 | 2.03412500  | -2.15601200 |
| H  | -3.87640400 | 3.19484200  | -2.41853700 |
| C  | 0.55272600  | 1.84108900  | 2.22529600  |
| C  | 1.36047700  | 3.13629400  | 2.23522500  |
| C  | -0.81610800 | 2.05184600  | 2.87505900  |
| C  | 1.32371400  | 0.77406000  | 3.00542900  |
| H  | 2.32255400  | 3.02741400  | 1.72358200  |
| H  | 0.82654500  | 3.97429600  | 1.78305900  |
| H  | 1.57250000  | 3.40520500  | 3.27661800  |
| H  | -1.42356500 | 1.13477000  | 2.82620900  |
| H  | -0.69570600 | 2.30786700  | 3.93384700  |
| H  | -1.38502000 | 2.86067900  | 2.40236500  |
| H  | 1.65248100  | 1.20787300  | 3.95622200  |
| H  | 0.70302000  | -0.09153300 | 3.25321100  |
| H  | 2.22147300  | 0.42166200  | 2.48446900  |
| Co | -1.44379100 | -0.23511100 | 0.62906600  |
| C  | -5.15335500 | -2.06710800 | 1.47822000  |
| C  | -4.88523900 | -1.26219900 | 2.61549800  |
| C  | -5.88366100 | -1.04397700 | 3.57859300  |
| C  | -7.12249500 | -1.63730700 | 3.40282300  |
| C  | -7.37133800 | -2.44731300 | 2.28291200  |
| C  | -6.40271800 | -2.67304300 | 1.31006400  |
| C  | -2.97325500 | -1.34652900 | 1.35564000  |
| C  | -3.53658400 | -0.84546900 | 2.51930600  |
| H  | -5.67494300 | -0.42521300 | 4.44766300  |
| H  | -7.90821000 | -1.48031900 | 4.13670800  |

|   |             |             |             |
|---|-------------|-------------|-------------|
| H | -8.34647000 | -2.91167500 | 2.16558800  |
| H | -6.61965100 | -3.29088900 | 0.44966100  |
| H | -3.00486000 | -0.25071400 | 3.25277900  |
| N | -3.97397800 | -2.12723400 | 0.71470200  |
| C | -3.85818400 | -2.84794300 | -0.49316400 |
| C | -2.62925200 | -3.34592700 | -0.93454700 |
| N | -4.98495200 | -3.00189200 | -1.19412300 |
| C | -2.57075400 | -3.99619700 | -2.15820800 |
| H | -1.73940000 | -3.24189100 | -0.33882200 |
| C | -4.91495400 | -3.65320100 | -2.35951200 |
| C | -3.73726900 | -4.15549600 | -2.90020500 |
| H | -1.61861100 | -4.37952100 | -2.51657900 |
| H | -5.85811100 | -3.76410200 | -2.89265900 |
| H | -3.73857500 | -4.65951900 | -3.86067300 |
| C | 8.01881700  | 0.04273300  | 2.75843400  |
| C | 6.97689400  | -0.82191100 | 2.44617000  |
| C | 5.76418900  | -0.31688800 | 1.94471600  |
| C | 5.62756200  | 1.07056100  | 1.75550600  |
| C | 6.67740400  | 1.92592200  | 2.06634100  |
| C | 7.87351200  | 1.41692600  | 2.57131800  |
| H | 8.95090700  | -0.35847600 | 3.14593300  |
| H | 7.08971400  | -1.89417300 | 2.58062700  |
| H | 4.69651900  | 1.46125200  | 1.35157500  |
| H | 6.56200000  | 2.99540600  | 1.91383000  |
| H | 8.69165800  | 2.08880400  | 2.81458400  |
| C | 4.70345500  | -1.19824100 | 1.59612600  |
| C | 3.81485800  | -1.95568900 | 1.25544800  |
| C | 2.76594400  | -2.84703600 | 0.79143000  |
| H | 2.09432500  | -3.10156400 | 1.61957700  |
| H | 3.18672000  | -3.80686800 | 0.45385700  |
| N | 1.93623400  | -2.21764900 | -0.26766200 |
| C | 0.49510700  | -2.46622100 | -0.10770900 |
| H | 0.01680700  | -2.19447400 | -1.05379800 |
| H | 0.30612800  | -3.54502500 | 0.04518100  |
| C | -0.05265300 | -1.67382100 | 1.06171800  |
| C | -1.23811600 | -2.09318900 | 1.75747900  |
| H | 0.72898000  | -1.26729000 | 1.69736900  |
| H | -1.24524000 | -1.82507800 | 2.81134600  |
| H | -1.61184500 | -3.10408700 | 1.59799900  |
| S | 2.44552000  | -2.59257900 | -1.85626400 |
| O | 2.38587100  | -4.04006500 | -2.08710400 |
| O | 1.68325200  | -1.69373200 | -2.72636000 |
| C | 4.14088000  | -2.10009800 | -1.80939100 |
| C | 5.12175500  | -3.06476100 | -1.58627000 |

|   |             |             |             |
|---|-------------|-------------|-------------|
| C | 4.46783600  | -0.75025300 | -1.93677500 |
| C | 6.44374000  | -2.66048000 | -1.45149500 |
| H | 4.84651300  | -4.11220300 | -1.50509700 |
| C | 5.79420100  | -0.36673400 | -1.80434900 |
| H | 3.69253400  | -0.01563800 | -2.13145500 |
| C | 6.79919000  | -1.30919200 | -1.54331000 |
| H | 7.21420900  | -3.40344400 | -1.26134800 |
| H | 6.05974000  | 0.68475600  | -1.88662100 |
| C | 8.21837000  | -0.87525700 | -1.36890000 |
| H | 8.27812200  | 0.13128800  | -0.94473400 |
| H | 8.77246900  | -1.55797900 | -0.71907600 |
| H | 8.74417200  | -0.84908800 | -2.33057800 |
| H | -1.34258200 | -0.64856100 | -0.73337400 |

### TS5S'

|                                              |             |             |                             |
|----------------------------------------------|-------------|-------------|-----------------------------|
| Zero-point correction=                       |             |             | 0.969463 (Hartree/Particle) |
| Thermal correction to Energy=                |             |             | 1.027960                    |
| Thermal correction to Enthalpy=              |             |             | 1.028904                    |
| Thermal correction to Gibbs Free Energy=     |             |             | 0.881121                    |
| Sum of electronic and zero-point Energies=   |             |             | -3589.212511                |
| Sum of electronic and thermal Energies=      |             |             | -3589.154014                |
| Sum of electronic and thermal Enthalpies=    |             |             | -3589.153070                |
| Sum of electronic and thermal Free Energies= |             |             | -3589.300853                |
| Imaginary frequency=-281.89 cm <sup>-1</sup> |             |             |                             |
| C                                            | -8.76426700 | -0.80378200 | -1.21147900                 |
| C                                            | -7.66864300 | -1.38179600 | -0.61467600                 |
| C                                            | -6.45065800 | -0.66787900 | -0.54927700                 |
| C                                            | -6.37649900 | 0.65082900  | -1.10516800                 |
| C                                            | -7.51843400 | 1.21685400  | -1.71474600                 |
| C                                            | -8.68902100 | 0.49740700  | -1.76311300                 |
| H                                            | -9.70198500 | -1.34886000 | -1.26333800                 |
| H                                            | -7.70697200 | -2.38045600 | -0.18937200                 |
| H                                            | -7.44085800 | 2.21721200  | -2.13017400                 |
| H                                            | -9.57071500 | 0.92920100  | -2.22724600                 |
| C                                            | -4.19224300 | 0.77807600  | -0.46585100                 |
| C                                            | -4.24923500 | -0.54166400 | 0.05955800                  |
| N                                            | -5.22551700 | 1.36839700  | -1.03470100                 |
| N                                            | -5.36669100 | -1.24373600 | 0.03299900                  |
| P                                            | -2.62668000 | 1.70239600  | -0.26245200                 |
| P                                            | -2.68200100 | -1.22984100 | 0.75424300                  |
| C                                            | -2.61429900 | 2.69852200  | -1.78338800                 |
| H                                            | -3.57270900 | 3.20825700  | -1.90308600                 |
| H                                            | -1.81049900 | 3.43688100  | -1.78024100                 |
| H                                            | -2.46993500 | 2.02234700  | -2.63025700                 |

|    |             |             |             |
|----|-------------|-------------|-------------|
| C  | -2.86280400 | -1.01990800 | 2.56224400  |
| H  | -3.86526400 | -1.29668500 | 2.89886600  |
| H  | -2.12365700 | -1.64966100 | 3.06732800  |
| H  | -2.66991100 | 0.01740500  | 2.84568700  |
| C  | -2.82108300 | -3.09679300 | 0.51689800  |
| C  | -3.14015200 | -3.39240700 | -0.94759400 |
| C  | -1.48519400 | -3.73415100 | 0.89599000  |
| C  | -3.90200000 | -3.68755500 | 1.42823600  |
| H  | -4.16367300 | -3.11132300 | -1.20824600 |
| H  | -2.45603900 | -2.87923600 | -1.63291500 |
| H  | -3.03532500 | -4.46857300 | -1.12635700 |
| H  | -1.10818600 | -3.39351700 | 1.86736800  |
| H  | -1.62333100 | -4.81921700 | 0.96264000  |
| H  | -0.72286400 | -3.54905900 | 0.14136400  |
| H  | -3.98529200 | -4.75612100 | 1.19686200  |
| H  | -3.63000500 | -3.61025100 | 2.48522900  |
| H  | -4.88163900 | -3.23193400 | 1.27874800  |
| C  | -2.94768900 | 2.87248400  | 1.22528100  |
| C  | -4.26133100 | 2.49468700  | 1.91385900  |
| C  | -1.80168500 | 2.73026200  | 2.22998300  |
| C  | -3.03645700 | 4.31729700  | 0.74187200  |
| H  | -5.12738900 | 2.64523900  | 1.26391200  |
| H  | -4.27451800 | 1.45776900  | 2.26692300  |
| H  | -4.38566500 | 3.13995500  | 2.79030600  |
| H  | -0.87106800 | 3.16985000  | 1.86398000  |
| H  | -2.06501200 | 3.25778100  | 3.15333300  |
| H  | -1.60620000 | 1.68528100  | 2.49774500  |
| H  | -3.18644700 | 4.96673200  | 1.61194200  |
| H  | -2.12289600 | 4.65138000  | 0.23915200  |
| H  | -3.88135700 | 4.47369700  | 0.06418700  |
| Co | -1.01892200 | 0.18142900  | -0.00503000 |
| C  | 1.84139700  | -2.58285700 | 1.56061700  |
| C  | 1.42551200  | -1.70749200 | 2.59969800  |
| C  | 1.82485300  | -1.95322900 | 3.92264800  |
| C  | 2.61209800  | -3.06347700 | 4.18991200  |
| C  | 3.00342800  | -3.92778700 | 3.15564200  |
| C  | 2.62667200  | -3.70588100 | 1.83455300  |
| C  | 0.47773700  | -0.98960100 | 0.65398600  |
| C  | 0.61398000  | -0.70491000 | 2.00048000  |
| H  | 1.50888200  | -1.28553500 | 4.72078000  |
| H  | 2.92752100  | -3.26959900 | 5.20914800  |
| H  | 3.61686600  | -4.79408400 | 3.38665100  |
| H  | 2.94020400  | -4.37711300 | 1.04632200  |
| H  | 0.16138400  | 0.14585500  | 2.50438500  |

|   |             |             |             |
|---|-------------|-------------|-------------|
| N | 1.25561300  | -2.12530800 | 0.36823200  |
| C | 1.36906500  | -2.74876700 | -0.89149200 |
| C | 0.39779100  | -2.53958900 | -1.87893800 |
| N | 2.43208600  | -3.53323800 | -1.07659300 |
| C | 0.56076000  | -3.16033600 | -3.10763600 |
| H | -0.46415400 | -1.91493500 | -1.66793500 |
| C | 2.56181000  | -4.13483500 | -2.26408400 |
| C | 1.66761100  | -3.97938300 | -3.31588400 |
| H | -0.18111300 | -3.01564900 | -3.88809700 |
| H | 3.44194400  | -4.76663400 | -2.37602600 |
| H | 1.82989500  | -4.48764300 | -4.26029100 |
| C | 6.41089600  | -1.21633600 | -3.51034000 |
| C | 5.56010000  | -0.11774900 | -3.53636300 |
| C | 4.56773600  | 0.03152300  | -2.55070600 |
| C | 4.44886900  | -0.95065500 | -1.55046700 |
| C | 5.30954300  | -2.04107200 | -1.52859200 |
| C | 6.29215700  | -2.17863000 | -2.50710100 |
| H | 7.17384900  | -1.32102300 | -4.27650500 |
| H | 5.65698900  | 0.63570100  | -4.31282700 |
| H | 3.67980800  | -0.84706800 | -0.78806000 |
| H | 5.19601000  | -2.79179200 | -0.75083600 |
| H | 6.96320300  | -3.03284400 | -2.48978100 |
| C | 3.70420700  | 1.16233200  | -2.52516900 |
| C | 2.95738300  | 2.11855600  | -2.42904100 |
| C | 2.11633400  | 3.29355100  | -2.23185600 |
| H | 1.20010400  | 3.22904700  | -2.83016200 |
| H | 2.63916600  | 4.18913200  | -2.57919200 |
| N | 1.70268300  | 3.52901000  | -0.84478000 |
| C | 0.54486700  | 2.81651900  | -0.25940000 |
| H | 0.78034200  | 2.61618700  | 0.79147200  |
| H | -0.31539500 | 3.49977900  | -0.26103000 |
| C | 0.22122600  | 1.51668600  | -0.94215300 |
| C | 1.05557800  | 0.39504700  | -0.68783600 |
| H | -0.20355000 | 1.59718300  | -1.94196500 |
| H | 1.91646400  | 0.56121900  | -0.04218300 |
| H | 1.23956200  | -0.29570000 | -1.50532000 |
| S | 2.81171400  | 4.16329500  | 0.23504900  |
| O | 3.79122100  | 4.88531300  | -0.57237600 |
| O | 2.01876300  | 4.83121000  | 1.26608700  |
| C | 3.62261700  | 2.79285700  | 1.01812500  |
| C | 4.77558300  | 2.25017500  | 0.44751200  |
| C | 3.06324400  | 2.23076400  | 2.16685800  |
| C | 5.35048300  | 1.12500100  | 1.02224500  |
| H | 5.21485100  | 2.70961500  | -0.43250600 |

|   |             |             |             |
|---|-------------|-------------|-------------|
| C | 3.64880400  | 1.09838500  | 2.72310200  |
| H | 2.18773400  | 2.68375400  | 2.62550700  |
| C | 4.79027400  | 0.52052500  | 2.15686800  |
| H | 6.24864400  | 0.69993800  | 0.57921800  |
| H | 3.21090500  | 0.64967300  | 3.61221000  |
| C | 5.40789000  | -0.70400200 | 2.75097100  |
| H | 6.35265400  | -0.46774200 | 3.25390000  |
| H | 4.74632500  | -1.17130100 | 3.48546100  |
| H | 5.64278300  | -1.44681800 | 1.98139400  |
| H | -1.45872200 | -0.26827000 | -1.29443800 |

### M7R'

|                                              |             |             |                             |
|----------------------------------------------|-------------|-------------|-----------------------------|
| Zero-point correction=                       |             |             | 0.968904 (Hartree/Particle) |
| Thermal correction to Energy=                |             |             | 1.028032                    |
| Thermal correction to Enthalpy=              |             |             | 1.028976                    |
| Thermal correction to Gibbs Free Energy=     |             | 0.878230    |                             |
| Sum of electronic and zero-point Energies=   |             |             | -3589.265831                |
| Sum of electronic and thermal Energies=      |             |             | -3589.206702                |
| Sum of electronic and thermal Enthalpies=    |             |             | -3589.205758                |
| Sum of electronic and thermal Free Energies= |             |             | -3589.356504                |
| C                                            | 3.97326900  | 5.27517200  | -1.85219000                 |
| C                                            | 2.63483300  | 4.98570700  | -1.97701100                 |
| C                                            | 2.02889900  | 4.07460000  | -1.08262000                 |
| C                                            | 2.81442600  | 3.48244700  | -0.04164000                 |
| C                                            | 4.18929500  | 3.79423500  | 0.05747600                  |
| C                                            | 4.75383300  | 4.67393200  | -0.83672900                 |
| H                                            | 4.44287500  | 5.96912000  | -2.54274400                 |
| H                                            | 2.02225100  | 5.42889700  | -2.75690800                 |
| H                                            | 4.77044300  | 3.32214600  | 0.84500200                  |
| H                                            | 5.81035400  | 4.91490000  | -0.76611300                 |
| C                                            | 0.98389600  | 2.31816900  | 0.66578500                  |
| C                                            | 0.21407200  | 2.86332000  | -0.40186600                 |
| N                                            | 2.25768900  | 2.61266700  | 0.84354900                  |
| N                                            | 0.71788300  | 3.75004700  | -1.24058900                 |
| P                                            | 0.14454900  | 1.15207900  | 1.82104900                  |
| P                                            | -1.50429900 | 2.24096900  | -0.60806000                 |
| C                                            | 1.50372100  | 0.03602600  | 2.27210900                  |
| H                                            | 2.40877200  | 0.62858000  | 2.42584200                  |
| H                                            | 1.27959900  | -0.52115600 | 3.18466500                  |
| H                                            | 1.66421200  | -0.67251300 | 1.45554400                  |
| C                                            | -2.48493800 | 3.77197600  | -0.41017300                 |
| H                                            | -1.99412300 | 4.60052000  | -0.92893000                 |
| H                                            | -3.48261000 | 3.62930700  | -0.83231800                 |
| H                                            | -2.58935900 | 4.02872000  | 0.64606100                  |

|    |             |             |             |
|----|-------------|-------------|-------------|
| C  | -1.67874900 | 1.83843500  | -2.44256900 |
| C  | -0.46735000 | 1.03520300  | -2.90507000 |
| C  | -2.94292100 | 0.98222200  | -2.53754200 |
| C  | -1.83216700 | 3.08735200  | -3.30781400 |
| H  | 0.45282700  | 1.62893700  | -2.87964800 |
| H  | -0.32161300 | 0.13078600  | -2.30762800 |
| H  | -0.62337500 | 0.71440900  | -3.94183100 |
| H  | -3.82435200 | 1.51119700  | -2.15378500 |
| H  | -3.14397400 | 0.72418400  | -3.58410700 |
| H  | -2.84301300 | 0.03974800  | -1.98204900 |
| H  | -1.89405800 | 2.77974400  | -4.35865800 |
| H  | -2.74560600 | 3.64484300  | -3.07955800 |
| H  | -0.97889400 | 3.76418300  | -3.20717100 |
| C  | -0.21252900 | 2.15630300  | 3.37486400  |
| C  | 1.08914300  | 2.67301600  | 3.98350400  |
| C  | -1.12080000 | 3.32463000  | 3.00462600  |
| C  | -0.92432100 | 1.23302300  | 4.36125700  |
| H  | 1.74519100  | 1.86057400  | 4.30904600  |
| H  | 1.64946700  | 3.31005000  | 3.29274800  |
| H  | 0.84852500  | 3.27412700  | 4.86837800  |
| H  | -2.06762800 | 2.97949800  | 2.57480100  |
| H  | -1.35767400 | 3.90440500  | 3.90371900  |
| H  | -0.64766000 | 4.00709900  | 2.28890400  |
| H  | -1.14871800 | 1.78622400  | 5.28020400  |
| H  | -1.87217400 | 0.86354700  | 3.95703700  |
| H  | -0.31250600 | 0.36834100  | 4.64030500  |
| Co | -1.52142900 | 0.37490900  | 0.74824700  |
| C  | -5.14147900 | -0.06055400 | -0.00477000 |
| C  | -4.78953100 | 1.11015000  | 0.70433700  |
| C  | -5.42241700 | 2.31590900  | 0.37837600  |
| C  | -6.35015800 | 2.32754900  | -0.65524000 |
| C  | -6.66304600 | 1.15476600  | -1.36221200 |
| C  | -6.06654800 | -0.05992500 | -1.04616800 |
| C  | -3.67535600 | -0.65848200 | 1.61631400  |
| C  | -3.81379200 | 0.72293600  | 1.68931600  |
| H  | -5.19106800 | 3.22457900  | 0.92833700  |
| H  | -6.84943400 | 3.25621800  | -0.91774700 |
| H  | -7.39140700 | 1.19432300  | -2.16706900 |
| H  | -6.31001500 | -0.96794100 | -1.58832700 |
| H  | -3.43812200 | 1.33140600  | 2.50389200  |
| N  | -4.44542700 | -1.12890000 | 0.56573800  |
| C  | -4.45985700 | -2.45753400 | 0.05495000  |
| C  | -4.77964900 | -3.53421200 | 0.87922200  |
| N  | -4.14473400 | -2.56932200 | -1.23680100 |

|   |             |             |             |
|---|-------------|-------------|-------------|
| C | -4.72407200 | -4.80985100 | 0.32728200  |
| H | -5.07512200 | -3.37023500 | 1.91041200  |
| C | -4.11293300 | -3.80304100 | -1.75259600 |
| C | -4.37730500 | -4.95166900 | -1.01214800 |
| H | -4.96133200 | -5.67740400 | 0.93532700  |
| H | -3.85112900 | -3.86922500 | -2.80647500 |
| H | -4.32125700 | -5.92902000 | -1.47948700 |
| C | 7.31341300  | -3.10581900 | 0.98875800  |
| C | 5.97732500  | -3.48378500 | 1.04621800  |
| C | 4.97650500  | -2.51771400 | 1.24947700  |
| C | 5.34885900  | -1.16793300 | 1.39407800  |
| C | 6.68691300  | -0.80028700 | 1.33205700  |
| C | 7.67291500  | -1.76636800 | 1.13079000  |
| H | 8.07813100  | -3.86113500 | 0.83219000  |
| H | 5.69381700  | -4.52619400 | 0.93128500  |
| H | 4.57639300  | -0.41620400 | 1.53815700  |
| H | 6.96180800  | 0.24601000  | 1.43782900  |
| H | 8.71843000  | -1.47540700 | 1.08355000  |
| C | 3.60275900  | -2.88476900 | 1.27596800  |
| C | 2.42049300  | -3.16666200 | 1.25960500  |
| C | 0.99483600  | -3.43627300 | 1.22359100  |
| H | 0.55877300  | -3.23144600 | 2.20867500  |
| H | 0.80280700  | -4.49783800 | 1.00867500  |
| N | 0.26382900  | -2.56478000 | 0.27244100  |
| C | -1.16294000 | -2.42327700 | 0.62330400  |
| H | -1.70544500 | -2.14928300 | -0.28885900 |
| H | -1.56786800 | -3.40694900 | 0.93312800  |
| C | -1.36150900 | -1.38707100 | 1.71801600  |
| C | -2.71995700 | -1.50262000 | 2.39566600  |
| H | -0.56460200 | -1.47010800 | 2.46328800  |
| H | -2.67146200 | -1.09293200 | 3.40903600  |
| H | -3.06865500 | -2.53965200 | 2.49011100  |
| S | 0.58060600  | -2.93853900 | -1.35872700 |
| O | 0.81686900  | -4.37520000 | -1.53200600 |
| O | -0.47644500 | -2.28500000 | -2.13582800 |
| C | 2.11734200  | -2.09985600 | -1.65454600 |
| C | 3.16129200  | -2.79451600 | -2.26112300 |
| C | 2.25838800  | -0.75973600 | -1.30109600 |
| C | 4.36106000  | -2.13509700 | -2.50310400 |
| H | 3.03780100  | -3.84302300 | -2.51421300 |
| C | 3.46553500  | -0.11908800 | -1.54413200 |
| H | 1.44113800  | -0.23303300 | -0.81320400 |
| C | 4.53548000  | -0.79262200 | -2.14669600 |
| H | 5.18633300  | -2.67741800 | -2.95856700 |



|   |             |             |             |
|---|-------------|-------------|-------------|
| H | 3.59293000  | 0.91993500  | -1.24712400 |
| C | 5.83711400  | -0.09779400 | -2.38779400 |
| H | 5.90984500  | 0.82957300  | -1.81185700 |
| H | 6.68606500  | -0.73539300 | -2.12279100 |
| H | 5.95681400  | 0.16260200  | -3.44582300 |
| H | -0.35203700 | 0.00359100  | -0.02930600 |

### M7S'

|                                              |            |             |                             |
|----------------------------------------------|------------|-------------|-----------------------------|
| Zero-point correction=                       |            |             | 0.971325 (Hartree/Particle) |
| Thermal correction to Energy=                |            |             | 1.029925                    |
| Thermal correction to Enthalpy=              |            |             | 1.030870                    |
| Thermal correction to Gibbs Free Energy=     |            |             | 0.882485                    |
| Sum of electronic and zero-point Energies=   |            |             | -3589.263710                |
| Sum of electronic and thermal Energies=      |            |             | -3589.205110                |
| Sum of electronic and thermal Enthalpies=    |            |             | -3589.204166                |
| Sum of electronic and thermal Free Energies= |            |             | -3589.352550                |
| C                                            | 8.71342700 | -0.71602200 | 1.98603800                  |
| C                                            | 7.72557700 | -1.29765200 | 1.22685400                  |
| C                                            | 6.50320300 | -0.61714700 | 1.02650200                  |
| C                                            | 6.31885200 | 0.68178900  | 1.60266900                  |
| C                                            | 7.35098700 | 1.25157900  | 2.38134700                  |
| C                                            | 8.52411400 | 0.55967900  | 2.56826800                  |
| H                                            | 9.65158200 | -1.23917000 | 2.14617100                  |
| H                                            | 7.84948100 | -2.27858900 | 0.77747700                  |
| H                                            | 7.19030300 | 2.23523100  | 2.81278800                  |
| H                                            | 9.31989300 | 0.99534700  | 3.16511100                  |
| C                                            | 4.24085400 | 0.78343700  | 0.67384700                  |
| C                                            | 4.38784700 | -0.53855400 | 0.16550700                  |
| N                                            | 5.17600200 | 1.38546300  | 1.38232100                  |
| N                                            | 5.51370000 | -1.21325400 | 0.30871200                  |
| P                                            | 2.72931800 | 1.69205800  | 0.17784200                  |
| P                                            | 2.91927500 | -1.28103300 | -0.66564700                 |
| C                                            | 2.47218600 | 2.85641700  | 1.54272300                  |
| H                                            | 3.39655100 | 3.40474600  | 1.74293300                  |
| H                                            | 1.67712400 | 3.56476400  | 1.29863500                  |
| H                                            | 2.19158100 | 2.29776100  | 2.43892000                  |
| C                                            | 3.56047500 | -1.74092800 | -2.31347800                 |
| H                                            | 4.55222500 | -2.19498200 | -2.23642300                 |
| H                                            | 2.87445100 | -2.45152600 | -2.78403700                 |
| H                                            | 3.62652600 | -0.85467800 | -2.94990200                 |
| C                                            | 2.68433000 | -2.93096700 | 0.22158600                  |
| C                                            | 2.66285600 | -2.68947300 | 1.72952400                  |
| C                                            | 1.33099200 | -3.46502000 | -0.23858400                 |
| C                                            | 3.77927400 | -3.93458700 | -0.13136200                 |

|    |             |             |             |
|----|-------------|-------------|-------------|
| H  | 3.62991700  | -2.34164800 | 2.10728200  |
| H  | 1.90102200  | -1.95541700 | 2.01716600  |
| H  | 2.42835700  | -3.62918800 | 2.24273400  |
| H  | 1.30239200  | -3.62862400 | -1.32206200 |
| H  | 1.12304200  | -4.42669000 | 0.24602100  |
| H  | 0.52537300  | -2.77260900 | 0.02618000  |
| H  | 3.60137500  | -4.85928400 | 0.43090000  |
| H  | 3.77025400  | -4.19392800 | -1.19418200 |
| H  | 4.77582400  | -3.56745200 | 0.12707700  |
| C  | 3.23975000  | 2.69777300  | -1.36816500 |
| C  | 4.71828500  | 2.48355600  | -1.68566000 |
| C  | 2.38126900  | 2.19401800  | -2.52958200 |
| C  | 2.98445400  | 4.18345000  | -1.13141900 |
| H  | 5.36910200  | 2.82923600  | -0.87668800 |
| H  | 4.95572900  | 1.43300800  | -1.88871000 |
| H  | 4.96977500  | 3.05589100  | -2.58582600 |
| H  | 1.31693500  | 2.37121800  | -2.34414600 |
| H  | 2.64952000  | 2.72841800  | -3.44839700 |
| H  | 2.52985500  | 1.12267600  | -2.71611600 |
| H  | 3.24155700  | 4.73445500  | -2.04329900 |
| H  | 1.93564600  | 4.40044300  | -0.90552000 |
| H  | 3.59957900  | 4.58163200  | -0.31909700 |
| Co | 1.24414900  | 0.24191000  | -0.34195000 |
| C  | -1.27083200 | -2.51255000 | -2.00633500 |
| C  | -0.35270600 | -1.65101800 | -2.64714000 |
| C  | 0.24851800  | -2.05091700 | -3.84567300 |
| C  | -0.06356300 | -3.30209600 | -4.36040800 |
| C  | -0.96335500 | -4.15150100 | -3.69648300 |
| C  | -1.58169000 | -3.77346400 | -2.50990700 |
| C  | -1.09096900 | -0.65016000 | -0.72724700 |
| C  | -0.23946300 | -0.48243800 | -1.82035500 |
| H  | 0.95079000  | -1.39450400 | -4.35448000 |
| H  | 0.39128800  | -3.63116500 | -5.29024400 |
| H  | -1.18767200 | -5.12552700 | -4.12155800 |
| H  | -2.28324400 | -4.42889700 | -2.00482200 |
| H  | 0.17617200  | 0.47219600  | -2.15318700 |
| N  | -1.68749300 | -1.88921000 | -0.82481300 |
| C  | -2.50372800 | -2.51669100 | 0.15902700  |
| C  | -2.05925100 | -2.62229300 | 1.47844600  |
| N  | -3.65358200 | -3.01960100 | -0.28678200 |
| C  | -2.88271700 | -3.27014200 | 2.38966600  |
| H  | -1.08876400 | -2.23090300 | 1.76968200  |
| C  | -4.42265100 | -3.65824900 | 0.60451100  |
| C  | -4.09103900 | -3.80103500 | 1.94705000  |

|   |             |             |             |
|---|-------------|-------------|-------------|
| H | -2.57659800 | -3.36984400 | 3.42707200  |
| H | -5.35299500 | -4.07011600 | 0.21748100  |
| H | -4.76140900 | -4.31817200 | 2.62609900  |
| C | -4.28752600 | -0.57113400 | 5.33346800  |
| C | -3.61060700 | 0.44913600  | 4.67457700  |
| C | -3.91057600 | 0.74725400  | 3.33325900  |
| C | -4.88933900 | -0.01575900 | 2.66940700  |
| C | -5.56863300 | -1.02430800 | 3.34086100  |
| C | -5.27329400 | -1.30483900 | 4.67451800  |
| H | -4.04788500 | -0.79040100 | 6.37017700  |
| H | -2.85119900 | 1.02862500  | 5.19211700  |
| H | -5.10437300 | 0.19380000  | 1.62454000  |
| H | -6.32989700 | -1.59752700 | 2.81739500  |
| H | -5.80510500 | -2.09558900 | 5.19641400  |
| C | -3.24905600 | 1.80091300  | 2.64126300  |
| C | -2.70174900 | 2.67882400  | 2.00050400  |
| C | -2.06008200 | 3.70489900  | 1.18471300  |
| H | -1.08634200 | 3.97516200  | 1.61307700  |
| H | -2.65773400 | 4.62166400  | 1.19161900  |
| N | -1.82307600 | 3.32412600  | -0.20797800 |
| C | -0.59177000 | 2.58836300  | -0.56761200 |
| H | -0.71177300 | 2.30179800  | -1.61694800 |
| H | 0.24385400  | 3.30411300  | -0.53673600 |
| C | -0.28110700 | 1.39972400  | 0.31442600  |
| C | -1.37860900 | 0.34029800  | 0.34436900  |
| H | -0.06552800 | 1.75000800  | 1.32961800  |
| H | -2.39688700 | 0.74577000  | 0.22079000  |
| H | -1.38306800 | -0.14930600 | 1.32193000  |
| S | -2.98547800 | 3.63129900  | -1.35983900 |
| O | -3.78290800 | 4.74912700  | -0.85787600 |
| O | -2.28402400 | 3.71077400  | -2.64065400 |
| C | -4.04901000 | 2.21076700  | -1.43465600 |
| C | -5.20394300 | 2.18189600  | -0.65327100 |
| C | -3.68803200 | 1.11461200  | -2.21924500 |
| C | -5.99820500 | 1.04275300  | -0.66294700 |
| H | -5.47449000 | 3.04492400  | -0.05234000 |
| C | -4.48710800 | -0.02418500 | -2.20311500 |
| H | -2.79503700 | 1.15510100  | -2.83794400 |
| C | -5.64860900 | -0.08154300 | -1.42339000 |
| H | -6.90318700 | 1.01778200  | -0.05977100 |
| H | -4.20343600 | -0.88821900 | -2.80042600 |
| C | -6.51243600 | -1.30224700 | -1.40605400 |
| H | -6.01288200 | -2.15745300 | -1.86701500 |
| H | -6.78986500 | -1.57631000 | -0.38212200 |

|   |             |             |             |
|---|-------------|-------------|-------------|
| H | -7.44986500 | -1.12975700 | -1.94730700 |
| H | 1.41190800  | -0.13319600 | 1.04002200  |

### M05

|                                              |             |             |                             |
|----------------------------------------------|-------------|-------------|-----------------------------|
| Zero-point correction=                       |             |             | 0.971603 (Hartree/Particle) |
| Thermal correction to Energy=                |             |             | 1.030825                    |
| Thermal correction to Enthalpy=              |             |             | 1.031769                    |
| Thermal correction to Gibbs Free Energy=     |             |             | 0.883367                    |
| Sum of electronic and zero-point Energies=   |             |             | -3589.268154                |
| Sum of electronic and thermal Energies=      |             |             | -3589.208933                |
| Sum of electronic and thermal Enthalpies=    |             |             | -3589.207989                |
| Sum of electronic and thermal Free Energies= |             |             | -3589.356391                |
| C                                            | 6.71509000  | -1.63910100 | -1.97230700                 |
| C                                            | 5.40168600  | -1.57679500 | -2.37607200                 |
| C                                            | 4.36867100  | -1.67103100 | -1.41565800                 |
| C                                            | 4.70137900  | -1.81334600 | -0.03008800                 |
| C                                            | 6.06063600  | -1.87720000 | 0.35331600                  |
| C                                            | 7.04499200  | -1.78898400 | -0.60395900                 |
| H                                            | 7.51142100  | -1.57366000 | -2.70782600                 |
| H                                            | 5.12600400  | -1.46895000 | -3.42149700                 |
| H                                            | 6.29585700  | -1.98561500 | 1.40845600                  |
| H                                            | 8.08973600  | -1.83243200 | -0.31119000                 |
| C                                            | 2.47982500  | -1.77679600 | 0.50618700                  |
| C                                            | 2.15611800  | -1.74871400 | -0.87449900                 |
| N                                            | 3.73042200  | -1.85768100 | 0.92087800                  |
| N                                            | 3.07254900  | -1.66895000 | -1.82253900                 |
| P                                            | 1.06567200  | -1.66906900 | 1.69068200                  |
| P                                            | 0.40732600  | -2.04771600 | -1.30307800                 |
| C                                            | 1.36477900  | -3.14486700 | 2.75109200                  |
| H                                            | 2.41831200  | -3.43321600 | 2.69355200                  |
| H                                            | 1.13373400  | -2.92875000 | 3.79760300                  |
| H                                            | 0.74366600  | -3.98248100 | 2.42567100                  |
| C                                            | 0.30797400  | -1.20837100 | -2.92138600                 |
| H                                            | 1.05923000  | -1.61787000 | -3.60184600                 |
| H                                            | -0.68013700 | -1.31453100 | -3.37258400                 |
| H                                            | 0.52574300  | -0.14416600 | -2.78025800                 |
| C                                            | 0.45676900  | -3.90811800 | -1.75758700                 |
| C                                            | 0.44822600  | -4.71504200 | -0.46284400                 |
| C                                            | -0.77627600 | -4.24530900 | -2.59475500                 |
| C                                            | 1.70901300  | -4.26275000 | -2.55854600                 |
| H                                            | 1.32525900  | -4.49144700 | 0.15714200                  |
| H                                            | -0.44836800 | -4.51823200 | 0.13673700                  |
| H                                            | 0.47525000  | -5.78588400 | -0.69686100                 |
| H                                            | -0.80672300 | -3.68264800 | -3.53395600                 |

|    |             |             |             |
|----|-------------|-------------|-------------|
| H  | -0.74729500 | -5.30996100 | -2.85339900 |
| H  | -1.71186700 | -4.07118000 | -2.05650100 |
| H  | 1.61227600  | -5.29666400 | -2.91058000 |
| H  | 1.84911900  | -3.62848800 | -3.43895800 |
| H  | 2.61805500  | -4.20730000 | -1.95396600 |
| C  | 1.63354100  | -0.23778100 | 2.83706200  |
| C  | 2.92466300  | -0.56660500 | 3.59157400  |
| C  | 1.87346800  | 0.99695000  | 1.96903100  |
| C  | 0.56128600  | 0.03061600  | 3.89497400  |
| H  | 2.83181300  | -1.46803300 | 4.20466100  |
| H  | 3.78168300  | -0.68982200 | 2.92876700  |
| H  | 3.13771100  | 0.26609400  | 4.27350500  |
| H  | 0.99209600  | 1.30914800  | 1.40018700  |
| H  | 2.16466100  | 1.84085400  | 2.60704000  |
| H  | 2.69030300  | 0.83288600  | 1.25723800  |
| H  | 0.85393200  | 0.91475400  | 4.47375200  |
| H  | -0.43596900 | 0.22061400  | 3.49106100  |
| H  | 0.48130100  | -0.80141500 | 4.60396500  |
| Co | -0.88557300 | -1.55136300 | 0.46490700  |
| C  | -4.83436700 | -1.32655400 | -0.32751000 |
| C  | -4.51442000 | -1.40898100 | -1.71427000 |
| C  | -5.46346200 | -0.99572200 | -2.66574800 |
| C  | -6.68019200 | -0.50481700 | -2.22587100 |
| C  | -6.96383000 | -0.40069600 | -0.85252800 |
| C  | -6.05124500 | -0.80365000 | 0.11432200  |
| C  | -2.66770100 | -2.02722600 | -0.54139500 |
| C  | -3.18074900 | -1.87670200 | -1.82420300 |
| H  | -5.23134500 | -1.04869400 | -3.72580700 |
| H  | -7.42209400 | -0.17482800 | -2.94712700 |
| H  | -7.91613500 | 0.01312600  | -0.53440700 |
| H  | -6.28203100 | -0.68240400 | 1.16665700  |
| H  | -1.95723400 | -2.85273600 | -0.22599600 |
| H  | -2.63996400 | -2.06002900 | -2.74326000 |
| N  | -3.71567300 | -1.76150600 | 0.36929400  |
| C  | -3.47814600 | -1.92899000 | 1.71823700  |
| C  | -4.49074300 | -2.11501100 | 2.66134400  |
| N  | -2.15407800 | -1.94414100 | 2.03193500  |
| C  | -4.13988900 | -2.30227800 | 3.98637800  |
| H  | -5.52477900 | -2.15280600 | 2.34359500  |
| C  | -1.84762500 | -2.16307700 | 3.32879300  |
| C  | -2.78811000 | -2.32544500 | 4.32779300  |
| H  | -4.90871000 | -2.45238600 | 4.73708200  |
| H  | -0.79519400 | -2.20745400 | 3.56595300  |
| H  | -2.45957800 | -2.48613800 | 5.34840000  |

|   |             |            |             |
|---|-------------|------------|-------------|
| C | 5.14757500  | 1.62658900 | -0.75473600 |
| C | 3.93626900  | 1.70734300 | -1.43171200 |
| C | 2.96693200  | 2.64821800 | -1.03961600 |
| C | 3.24942400  | 3.50822000 | 0.03672100  |
| C | 4.46288700  | 3.41912100 | 0.70740200  |
| C | 5.41357200  | 2.47614800 | 0.31829400  |
| H | 5.88845600  | 0.89502600 | -1.06749200 |
| H | 3.72545600  | 1.04506800 | -2.26774100 |
| H | 2.50009200  | 4.23206900 | 0.34374700  |
| H | 4.66578200  | 4.08623400 | 1.54131100  |
| H | 6.36065700  | 2.40491800 | 0.84586500  |
| C | 1.70901000  | 2.69796500 | -1.70332800 |
| C | 0.62521200  | 2.70883200 | -2.25760800 |
| C | -0.67902800 | 2.69079400 | -2.91344900 |
| H | -0.66550200 | 1.96266100 | -3.73489200 |
| H | -0.89448400 | 3.66142600 | -3.37420600 |
| N | -1.81578400 | 2.34024100 | -2.05620600 |
| C | -1.89268400 | 0.96831900 | -1.52864000 |
| H | -2.93374300 | 0.78108300 | -1.25970700 |
| H | -1.66335700 | 0.32232600 | -2.38068200 |
| C | -1.00829300 | 0.70846600 | -0.34430300 |
| C | -1.54152500 | 0.57472800 | 0.90047100  |
| H | 0.06091800  | 0.87518900 | -0.46907000 |
| H | -2.62342900 | 0.58743000 | 1.02572500  |
| H | -0.95159400 | 0.69436700 | 1.79942800  |
| S | -2.59869000 | 3.58308500 | -1.24579000 |
| O | -2.85832700 | 4.60847700 | -2.25494400 |
| O | -3.68375300 | 2.94046700 | -0.50759600 |
| C | -1.47221400 | 4.29875300 | -0.07263000 |
| C | -0.60226800 | 5.30535500 | -0.48888700 |
| C | -1.43047400 | 3.81415800 | 1.23494500  |
| C | 0.33247600  | 5.80682100 | 0.40934800  |
| H | -0.65769600 | 5.69004800 | -1.50298100 |
| C | -0.48178300 | 4.31685600 | 2.11554600  |
| H | -2.14173900 | 3.05972200 | 1.55448000  |
| C | 0.42242800  | 5.30982500 | 1.71515500  |
| H | 1.01826200  | 6.58786900 | 0.08895200  |
| H | -0.43961000 | 3.93475000 | 3.13392500  |
| C | 1.46186000  | 5.81883300 | 2.66207100  |
| H | 1.98776700  | 4.99394600 | 3.15498300  |
| H | 2.20381200  | 6.43884300 | 2.15197500  |
| H | 1.01490900  | 6.42398300 | 3.45874900  |

**M1R-F**

|                                              |             |             |                             |
|----------------------------------------------|-------------|-------------|-----------------------------|
| Zero-point correction=                       |             |             | 0.763169 (Hartree/Particle) |
| Thermal correction to Energy=                |             |             | 0.810888                    |
| Thermal correction to Enthalpy=              |             |             | 0.811832                    |
| Thermal correction to Gibbs Free Energy=     |             |             | 0.686265                    |
| Sum of electronic and zero-point Energies=   |             |             | -3077.852247                |
| Sum of electronic and thermal Energies=      |             |             | -3077.804527                |
| Sum of electronic and thermal Enthalpies=    |             |             | -3077.803583                |
| Sum of electronic and thermal Free Energies= |             |             | -3077.929150                |
| C                                            | -6.25190700 | -4.29171700 | -0.81870900                 |
| C                                            | -4.90734900 | -4.07527100 | -1.00680200                 |
| C                                            | -4.32456600 | -2.86720800 | -0.56206900                 |
| C                                            | -5.14124600 | -1.88670400 | 0.09098800                  |
| C                                            | -6.52066600 | -2.13827700 | 0.26775500                  |
| C                                            | -7.06040400 | -3.32037900 | -0.18199000                 |
| H                                            | -6.70442600 | -5.21617300 | -1.16469900                 |
| H                                            | -4.27070000 | -4.80558400 | -1.49774600                 |
| H                                            | -7.12395700 | -1.38328800 | 0.76358800                  |
| H                                            | -8.11996200 | -3.51696900 | -0.04781200                 |
| C                                            | -3.30867500 | -0.55374500 | 0.37031800                  |
| C                                            | -2.51506100 | -1.49728600 | -0.33684000                 |
| N                                            | -4.60430600 | -0.72774800 | 0.55662700                  |
| N                                            | -3.00311000 | -2.63928600 | -0.78398100                 |
| P                                            | -2.43914000 | 0.91388300  | 1.04924000                  |
| P                                            | -0.76632700 | -1.04499500 | -0.68746600                 |
| C                                            | -3.28267500 | 2.27718500  | 0.16938400                  |
| H                                            | -4.35312300 | 2.06599400  | 0.09349700                  |
| H                                            | -3.14711800 | 3.21490000  | 0.71203200                  |
| H                                            | -2.86707600 | 2.40131100  | -0.83203100                 |
| C                                            | 0.04978600  | -2.66764000 | -0.70973700                 |
| H                                            | -0.55589500 | -3.34535100 | -1.31675000                 |
| H                                            | 1.05538300  | -2.59059500 | -1.12979600                 |
| H                                            | 0.11282500  | -3.08514000 | 0.29660200                  |
| C                                            | -0.77583800 | -0.50851200 | -2.50423000                 |
| C                                            | -1.64131400 | 0.73816000  | -2.65011500                 |
| C                                            | 0.65281900  | -0.20405500 | -2.94612200                 |
| C                                            | -1.33795100 | -1.63673400 | -3.37256400                 |
| H                                            | -2.68350300 | 0.55768500  | -2.35944200                 |
| H                                            | -1.25152000 | 1.56871100  | -2.05269100                 |
| H                                            | -1.64274700 | 1.05555700  | -3.69881700                 |
| H                                            | 1.33006400  | -1.05108300 | -2.80217000                 |
| H                                            | 0.64141100  | 0.03007500  | -4.01689800                 |
| H                                            | 1.06417400  | 0.66549800  | -2.42982800                 |
| H                                            | -1.37216400 | -1.27807000 | -4.40758800                 |
| H                                            | -0.70355300 | -2.52728500 | -3.35854700                 |

|    |             |             |             |
|----|-------------|-------------|-------------|
| H  | -2.35230200 | -1.92954800 | -3.09003500 |
| C  | -3.08438200 | 1.08258100  | 2.82748500  |
| C  | -4.45685000 | 1.75632000  | 2.86907000  |
| C  | -3.20630400 | -0.29241300 | 3.48579000  |
| C  | -2.07317200 | 1.95878000  | 3.56935200  |
| H  | -4.43182200 | 2.78668200  | 2.50422300  |
| H  | -5.20340100 | 1.20007500  | 2.29526200  |
| H  | -4.79349400 | 1.78820000  | 3.91228400  |
| H  | -2.30819000 | -0.90603000 | 3.39006900  |
| H  | -3.39987700 | -0.15636600 | 4.55604800  |
| H  | -4.04500000 | -0.85771800 | 3.06995600  |
| H  | -2.40446800 | 2.10631700  | 4.60384500  |
| H  | -1.07208900 | 1.51434500  | 3.59773300  |
| H  | -1.98516800 | 2.95133100  | 3.11135300  |
| Co | -0.20471400 | 0.53729900  | 0.70015700  |
| C  | 0.00458400  | 5.33587300  | -2.11504900 |
| C  | 0.34111900  | 4.06849300  | -1.67401800 |
| C  | -0.05193500 | 3.56861000  | -0.42377600 |
| C  | -0.80417100 | 4.42432700  | 0.39673500  |
| C  | -1.13772900 | 5.70753400  | -0.01570500 |
| C  | -0.74004400 | 6.15996900  | -1.27381900 |
| H  | 0.33037400  | 5.66285200  | -3.09701900 |
| H  | -1.11016700 | 4.05736700  | 1.37393900  |
| H  | -1.71078500 | 6.35493100  | 0.64069100  |
| H  | -1.00702900 | 7.15911800  | -1.60487500 |
| C  | 0.33187100  | 2.24244900  | -0.01279100 |
| C  | 1.29155000  | 1.36896500  | -0.02629300 |
| C  | 2.67007600  | 0.91697100  | -0.25207300 |
| H  | 3.33858500  | 1.35443200  | 0.50896600  |
| H  | 3.02238900  | 1.25332100  | -1.23178500 |
| N  | 2.68226300  | -0.55121900 | -0.22838100 |
| C  | 2.32649500  | -1.15729100 | 1.07114000  |
| H  | 1.99874200  | -2.18251300 | 0.88906100  |
| H  | 3.21271700  | -1.20084600 | 1.72720700  |
| C  | 1.27397900  | -0.35989000 | 1.78373300  |
| C  | 0.02638200  | -0.85059000 | 2.20836100  |
| H  | 1.66753000  | 0.48984800  | 2.34480000  |
| H  | -0.40663800 | -0.43063200 | 3.11126900  |
| H  | -0.27285200 | -1.87552300 | 1.99699900  |
| S  | 3.90660300  | -1.33226200 | -1.07932400 |
| O  | 3.47961600  | -2.72896100 | -1.14995300 |
| O  | 4.12589000  | -0.54240200 | -2.28795100 |
| C  | 5.37248400  | -1.27274500 | -0.08504300 |
| C  | 5.59349800  | -2.28046500 | 0.85492900  |



|   |            |             |             |
|---|------------|-------------|-------------|
| C | 6.26103400 | -0.20426700 | -0.21515500 |
| C | 6.72085800 | -2.21626200 | 1.66433400  |
| H | 4.89877300 | -3.11168100 | 0.93296000  |
| C | 7.38559600 | -0.16147800 | 0.59904400  |
| H | 6.08082600 | 0.56884200  | -0.95661200 |
| C | 7.63487500 | -1.16208500 | 1.54848200  |
| H | 6.89991300 | -3.00112900 | 2.39496600  |
| H | 8.08948500 | 0.66082900  | 0.49541400  |
| C | 8.86753900 | -1.12009500 | 2.39348100  |
| H | 9.14680400 | -0.09474900 | 2.65056000  |
| H | 8.74395400 | -1.68834400 | 3.31889200  |
| H | 9.71999900 | -1.55565100 | 1.85934800  |
| F | 1.06521400 | 3.26776400  | -2.48328700 |

#### MIS-F

|                                              |            |             |                             |
|----------------------------------------------|------------|-------------|-----------------------------|
| Zero-point correction=                       |            |             | 0.762528 (Hartree/Particle) |
| Thermal correction to Energy=                |            |             | 0.809470                    |
| Thermal correction to Enthalpy=              |            |             | 0.810414                    |
| Thermal correction to Gibbs Free Energy=     |            |             | 0.686208                    |
| Sum of electronic and zero-point Energies=   |            |             | -3077.855203                |
| Sum of electronic and thermal Energies=      |            |             | -3077.808262                |
| Sum of electronic and thermal Enthalpies=    |            |             | -3077.807318                |
| Sum of electronic and thermal Free Energies= |            |             | -3077.931524                |
| C                                            | 7.83663100 | -1.81117000 | -0.88017900                 |
| C                                            | 6.64729600 | -2.24538900 | -0.34438600                 |
| C                                            | 5.49996300 | -1.42467800 | -0.43189200                 |
| C                                            | 5.58786900 | -0.15689500 | -1.09734800                 |
| C                                            | 6.82724900 | 0.26427700  | -1.62967800                 |
| C                                            | 7.92770600 | -0.55186500 | -1.51996300                 |
| H                                            | 8.72118800 | -2.43706200 | -0.81230500                 |
| H                                            | 6.55919600 | -3.20474300 | 0.15704800                  |
| H                                            | 6.87561400 | 1.23009400  | -2.12402800                 |
| H                                            | 8.88129400 | -0.23139600 | -1.92855200                 |
| C                                            | 3.36463800 | 0.18951600  | -0.72003400                 |
| C                                            | 3.29611200 | -1.03389900 | -0.00395000                 |
| N                                            | 4.49433600 | 0.63841900  | -1.23549300                 |
| N                                            | 4.33456700 | -1.83729100 | 0.13230100                  |
| P                                            | 1.79465500 | 1.12214800  | -0.90376800                 |
| P                                            | 1.69488700 | -1.43981700 | 0.79555800                  |
| C                                            | 2.21114400 | 2.68710500  | -0.05530400                 |
| H                                            | 3.24158000 | 2.96580500  | -0.29305300                 |
| H                                            | 1.54523600 | 3.48756300  | -0.38354300                 |
| H                                            | 2.10863400 | 2.58393400  | 1.02696900                  |
| C                                            | 1.63524400 | -3.24876800 | 0.62955100                  |

|    |             |             |             |
|----|-------------|-------------|-------------|
| H  | 2.61181800  | -3.65234600 | 0.90872100  |
| H  | 0.86683300  | -3.67610200 | 1.27751300  |
| H  | 1.43356600  | -3.53637500 | -0.40477400 |
| C  | 1.95017000  | -1.12485800 | 2.63403700  |
| C  | 2.39866000  | 0.32160900  | 2.81665500  |
| C  | 0.62249500  | -1.36357100 | 3.35029200  |
| C  | 3.01100400  | -2.08192800 | 3.18003000  |
| H  | 3.37427600  | 0.51437000  | 2.35493700  |
| H  | 1.66744600  | 1.01786400  | 2.39684500  |
| H  | 2.48636300  | 0.54352600  | 3.88599200  |
| H  | 0.23401900  | -2.37351900 | 3.17749400  |
| H  | 0.77723500  | -1.25100800 | 4.42924200  |
| H  | -0.13669900 | -0.63968000 | 3.04732400  |
| H  | 3.19918100  | -1.82204200 | 4.22795300  |
| H  | 2.67909900  | -3.12365300 | 3.15712800  |
| H  | 3.96165000  | -2.01016900 | 2.64372200  |
| C  | 1.71248100  | 1.63104900  | -2.72723500 |
| C  | 2.66172000  | 2.79163500  | -3.02967200 |
| C  | 2.08539400  | 0.45300500  | -3.62518600 |
| C  | 0.27289800  | 2.07857000  | -2.98187100 |
| H  | 2.39218400  | 3.70583800  | -2.49441900 |
| H  | 3.70041100  | 2.54253400  | -2.79661900 |
| H  | 2.60190000  | 3.01365700  | -4.10184200 |
| H  | 1.47360100  | -0.43353400 | -3.45169000 |
| H  | 1.94283100  | 0.74950600  | -4.67065800 |
| H  | 3.13678000  | 0.17262400  | -3.50731700 |
| H  | 0.15822500  | 2.36564700  | -4.03342400 |
| H  | -0.45534500 | 1.28875300  | -2.76630300 |
| H  | 0.01364400  | 2.95454600  | -2.37586100 |
| Co | 0.11223700  | -0.19825800 | -0.07472800 |
| C  | -0.52146100 | 4.14261800  | 3.22439800  |
| C  | -0.55017500 | 2.84539200  | 2.74341000  |
| C  | -0.71884800 | 2.54114900  | 1.38809000  |
| C  | -0.90039000 | 3.61987400  | 0.50929900  |
| C  | -0.89579700 | 4.93012200  | 0.97268500  |
| C  | -0.69319800 | 5.19366700  | 2.32663200  |
| H  | -0.37763500 | 4.31193500  | 4.28656300  |
| H  | -1.05232500 | 3.40711400  | -0.54604400 |
| H  | -1.04492500 | 5.74686800  | 0.27316900  |
| H  | -0.67593700 | 6.21638500  | 2.69032100  |
| C  | -0.73122400 | 1.17044400  | 0.92917300  |
| C  | -1.45415500 | 0.08989000  | 0.88420700  |
| C  | -2.77619600 | -0.46707500 | 1.18327900  |
| H  | -3.53066200 | 0.29234000  | 0.90959500  |

|   |             |             |             |
|---|-------------|-------------|-------------|
| H | -2.87484400 | -0.64600800 | 2.25898300  |
| N | -2.99402000 | -1.73096800 | 0.46528000  |
| C | -2.38845600 | -1.75492000 | -0.87307400 |
| H | -2.78057300 | -2.63973100 | -1.38677600 |
| H | -2.66421100 | -0.86745600 | -1.46746900 |
| C | -0.90555900 | -1.90283700 | -0.75253300 |
| C | -0.00605800 | -1.43112100 | -1.71537600 |
| H | -0.62872400 | -2.74747000 | -0.12635100 |
| H | 0.91401600  | -1.97353400 | -1.92412200 |
| H | -0.38906900 | -0.84165700 | -2.54790400 |
| S | -4.57185800 | -2.32063000 | 0.57252200  |
| O | -4.55420000 | -3.63045100 | -0.07096900 |
| O | -4.94751400 | -2.15796200 | 1.97384800  |
| C | -5.56960000 | -1.23238100 | -0.40924900 |
| C | -5.69117500 | -1.46616000 | -1.78170100 |
| C | -6.15810600 | -0.11417000 | 0.18118600  |
| C | -6.41219700 | -0.57063200 | -2.55829900 |
| H | -5.24057400 | -2.34886400 | -2.22664700 |
| C | -6.87736000 | 0.77158800  | -0.61445300 |
| H | -6.06899500 | 0.04501400  | 1.25184100  |
| C | -7.01502100 | 0.56177300  | -1.99099700 |
| H | -6.51752400 | -0.75268800 | -3.62529300 |
| H | -7.34638900 | 1.64003400  | -0.15829400 |
| C | -7.80151500 | 1.50655500  | -2.84167100 |
| H | -8.08847500 | 2.40510900  | -2.29065400 |
| H | -7.23678500 | 1.81352600  | -3.72752300 |
| H | -8.71993500 | 1.03403700  | -3.20735400 |
| F | -0.40839500 | 1.81994800  | 3.61411400  |

### MIR-OMe

|                                              |             |             |                             |
|----------------------------------------------|-------------|-------------|-----------------------------|
| Zero-point correction=                       |             |             | 0.805228 (Hartree/Particle) |
| Thermal correction to Energy=                |             |             | 0.854268                    |
| Thermal correction to Enthalpy=              |             |             | 0.855212                    |
| Thermal correction to Gibbs Free Energy=     |             |             | 0.727160                    |
| Sum of electronic and zero-point Energies=   |             |             | -3093.101897                |
| Sum of electronic and thermal Energies=      |             |             | -3093.052858                |
| Sum of electronic and thermal Enthalpies=    |             |             | -3093.051913                |
| Sum of electronic and thermal Free Energies= |             |             | -3093.179966                |
| C                                            | -6.49855100 | -3.97358500 | -1.18687300                 |
| C                                            | -5.14478800 | -3.80256000 | -1.35554700                 |
| C                                            | -4.50940400 | -2.66549200 | -0.80725400                 |
| C                                            | -5.28325000 | -1.71088800 | -0.06967500                 |
| C                                            | -6.67466800 | -1.91033700 | 0.07830700                  |
| C                                            | -7.26552700 | -3.02327100 | -0.47222400                 |

|   |             |             |             |
|---|-------------|-------------|-------------|
| H | -6.99045200 | -4.84473300 | -1.60933700 |
| H | -4.53993600 | -4.51687300 | -1.90647400 |
| H | -7.24515700 | -1.17382400 | 0.63687100  |
| H | -8.33378100 | -3.18109900 | -0.35746400 |
| C | -3.38874700 | -0.50858000 | 0.35150800  |
| C | -2.63743400 | -1.41489800 | -0.44565600 |
| N | -4.69394700 | -0.63115900 | 0.51022300  |
| N | -3.17693400 | -2.48165000 | -1.00511800 |
| P | -2.45089000 | 0.82666600  | 1.19216300  |
| P | -0.86227600 | -1.02014200 | -0.73052400 |
| C | -3.20462000 | 2.31551400  | 0.44240100  |
| H | -4.28189800 | 2.16562300  | 0.32782400  |
| H | -3.03399900 | 3.18902600  | 1.07356000  |
| H | -2.76287800 | 2.51659000  | -0.53455000 |
| C | -0.13263800 | -2.67237800 | -0.93091400 |
| H | -0.74350700 | -3.23408200 | -1.64189800 |
| H | 0.89403100  | -2.60235300 | -1.29834900 |
| H | -0.14117300 | -3.22085800 | 0.01246700  |
| C | -0.79971800 | -0.28672100 | -2.47554900 |
| C | -1.54176000 | 1.04475900  | -2.48557500 |
| C | 0.66042400  | -0.07632900 | -2.86712600 |
| C | -1.45559600 | -1.24718800 | -3.47039400 |
| H | -2.59566400 | 0.93014200  | -2.20288600 |
| H | -1.07567400 | 1.77280500  | -1.81470900 |
| H | -1.51614200 | 1.46401600  | -3.49831200 |
| H | 1.24481500  | -1.00025900 | -2.82705400 |
| H | 0.69161900  | 0.28815700  | -3.90094600 |
| H | 1.14463400  | 0.67602400  | -2.24111500 |
| H | -1.43092000 | -0.77456100 | -4.45902200 |
| H | -0.91771700 | -2.19558000 | -3.55356300 |
| H | -2.50098100 | -1.46079900 | -3.23389800 |
| C | -3.11723300 | 0.85518600  | 2.96938100  |
| C | -4.43601600 | 1.62293500  | 3.06836400  |
| C | -3.35046300 | -0.56687500 | 3.48091800  |
| C | -2.05274300 | 1.56637300  | 3.80718600  |
| H | -4.32843700 | 2.68075800  | 2.81255500  |
| H | -5.21127900 | 1.18734600  | 2.43121300  |
| H | -4.78876100 | 1.57286700  | 4.10556800  |
| H | -2.50620400 | -1.23847700 | 3.31002100  |
| H | -3.52819900 | -0.52909600 | 4.56186900  |
| H | -4.23422300 | -1.01621900 | 3.01941700  |
| H | -2.39115900 | 1.64058400  | 4.84710700  |
| H | -1.09544600 | 1.03297200  | 3.80114600  |
| H | -1.87136900 | 2.58694900  | 3.44873400  |

|    |             |             |             |
|----|-------------|-------------|-------------|
| Co | -0.24223600 | 0.34169400  | 0.85727000  |
| C  | 0.25683500  | 5.24561900  | -1.64542400 |
| C  | 0.59653700  | 3.95428000  | -1.24027700 |
| C  | 0.11957100  | 3.44620600  | -0.00389100 |
| C  | -0.64632800 | 4.28711700  | 0.81225000  |
| C  | -0.95357200 | 5.58631800  | 0.42733100  |
| C  | -0.51262000 | 6.05266800  | -0.80938600 |
| H  | 0.59697500  | 5.62716400  | -2.60220100 |
| H  | -0.99265100 | 3.89523400  | 1.76590000  |
| H  | -1.54104500 | 6.22547200  | 1.07891600  |
| H  | -0.76378800 | 7.05918700  | -1.13270000 |
| C  | 0.42033500  | 2.08546100  | 0.35576000  |
| C  | 1.31852000  | 1.15378800  | 0.26300800  |
| C  | 2.66771600  | 0.65454000  | -0.01589000 |
| H  | 3.36185800  | 0.95143800  | 0.78965100  |
| H  | 3.03609600  | 1.09199900  | -0.94950400 |
| N  | 2.59599200  | -0.80404400 | -0.17596700 |
| C  | 2.19568400  | -1.53858300 | 1.04322000  |
| H  | 1.84380100  | -2.52666200 | 0.74357100  |
| H  | 3.06566600  | -1.68242100 | 1.70631000  |
| C  | 1.15285800  | -0.79037100 | 1.82388800  |
| C  | -0.13070200 | -1.26243900 | 2.15537000  |
| H  | 1.57199500  | -0.05088900 | 2.50921600  |
| H  | -0.56037400 | -0.94949700 | 3.10256900  |
| H  | -0.48246400 | -2.22757400 | 1.79592300  |
| S  | 3.83058100  | -1.51515800 | -1.07189500 |
| O  | 3.42743700  | -2.91098800 | -1.23121500 |
| O  | 4.03832900  | -0.64687400 | -2.22807800 |
| C  | 5.29214000  | -1.46739600 | -0.06987700 |
| C  | 5.60973700  | -2.55521300 | 0.74283500  |
| C  | 6.07711900  | -0.31160300 | -0.06305400 |
| C  | 6.73173800  | -2.48296400 | 1.56094500  |
| H  | 4.99373100  | -3.44914600 | 0.72002800  |
| C  | 7.19254500  | -0.25874100 | 0.76133800  |
| H  | 5.82308200  | 0.52436200  | -0.70865000 |
| C  | 7.54039500  | -1.34086700 | 1.58253800  |
| H  | 6.99009000  | -3.33045000 | 2.19097500  |
| H  | 7.81281500  | 0.63422000  | 0.76547900  |
| C  | 8.76156100  | -1.27838500 | 2.44259100  |
| H  | 8.85951000  | -0.30605100 | 2.93424800  |
| H  | 8.75539700  | -2.05481100 | 3.21129400  |
| H  | 9.66896700  | -1.41832300 | 1.84399600  |
| O  | 1.36123100  | 3.10458300  | -1.96567200 |
| C  | 1.75827000  | 3.51407600  | -3.26771000 |

|   |            |            |             |
|---|------------|------------|-------------|
| H | 0.88748000 | 3.68187200 | -3.91260900 |
| H | 2.36956700 | 4.42263200 | -3.23758500 |
| H | 2.35629700 | 2.69528000 | -3.66947800 |

### MIS-OMe

|                                              |             |             |                             |
|----------------------------------------------|-------------|-------------|-----------------------------|
| Zero-point correction=                       |             |             | 0.804190 (Hartree/Particle) |
| Thermal correction to Energy=                |             |             | 0.853619                    |
| Thermal correction to Enthalpy=              |             |             | 0.854563                    |
| Thermal correction to Gibbs Free Energy=     |             |             | 0.724501                    |
| Sum of electronic and zero-point Energies=   |             |             | -3093.104870                |
| Sum of electronic and thermal Energies=      |             |             | -3093.055442                |
| Sum of electronic and thermal Enthalpies=    |             |             | -3093.054498                |
| Sum of electronic and thermal Free Energies= |             |             | -3093.184560                |
| C                                            | -7.92438800 | -1.91577800 | -0.20127800                 |
| C                                            | -6.70307300 | -2.09619900 | -0.80623700                 |
| C                                            | -5.56398000 | -1.43484100 | -0.29312700                 |
| C                                            | -5.69722400 | -0.58589200 | 0.85454500                  |
| C                                            | -6.96653800 | -0.42179900 | 1.45380500                  |
| C                                            | -8.05628100 | -1.07588900 | 0.93036000                  |
| H                                            | -8.80244400 | -2.41964500 | -0.59429400                 |
| H                                            | -6.58121800 | -2.73513200 | -1.67594000                 |
| H                                            | -7.04716600 | 0.22648300  | 2.32137300                  |
| H                                            | -9.03321400 | -0.95040700 | 1.38729500                  |
| C                                            | -3.46134800 | -0.13582100 | 0.77699800                  |
| C                                            | -3.33651100 | -0.95543100 | -0.37430900                 |
| N                                            | -4.62236500 | 0.06317400  | 1.37405700                  |
| N                                            | -4.36088900 | -1.60054000 | -0.90213900                 |
| P                                            | -1.92787900 | 0.68144400  | 1.37443900                  |
| P                                            | -1.66844900 | -1.08831700 | -1.13180600                 |
| C                                            | -2.36174800 | 2.42630300  | 1.04257300                  |
| H                                            | -3.41306100 | 2.59793900  | 1.29045900                  |
| H                                            | -1.74350100 | 3.09572500  | 1.64222800                  |
| H                                            | -2.19723100 | 2.66366100  | -0.01037600                 |
| C                                            | -1.63838500 | -2.85194500 | -1.57988500                 |
| H                                            | -2.59947700 | -3.10429700 | -2.03549500                 |
| H                                            | -0.83219800 | -3.07295200 | -2.28253800                 |
| H                                            | -1.51352200 | -3.47127800 | -0.68882800                 |
| C                                            | -1.74996900 | -0.17398400 | -2.77405100                 |
| C                                            | -2.11152800 | 1.28426500  | -2.50482400                 |
| C                                            | -0.37585600 | -0.26325800 | -3.43740100                 |
| C                                            | -2.80106900 | -0.81957800 | -3.67904400                 |
| H                                            | -3.10339800 | 1.38445600  | -2.04829300                 |
| H                                            | -1.37655200 | 1.76700500  | -1.85332700                 |
| H                                            | -2.12554900 | 1.83429700  | -3.45292500                 |

|    |             |             |             |
|----|-------------|-------------|-------------|
| H  | -0.03162900 | -1.29672500 | -3.55843800 |
| H  | -0.44199200 | 0.17820900  | -4.43860000 |
| H  | 0.37727900  | 0.29388900  | -2.87685600 |
| H  | -2.86616600 | -0.22962000 | -4.60045100 |
| H  | -2.53023600 | -1.84041600 | -3.96360000 |
| H  | -3.79501600 | -0.84061300 | -3.22360300 |
| C  | -1.97617800 | 0.57482800  | 3.26407900  |
| C  | -2.98731200 | 1.55729200  | 3.85759800  |
| C  | -2.35046600 | -0.83840200 | 3.70649300  |
| C  | -0.57404900 | 0.93929100  | 3.75391100  |
| H  | -2.72571400 | 2.59999800  | 3.65848600  |
| H  | -3.99975300 | 1.37521200  | 3.48759900  |
| H  | -2.99609300 | 1.42666600  | 4.94615500  |
| H  | -1.66863400 | -1.60229000 | 3.32866300  |
| H  | -2.31626600 | -0.88342400 | 4.80108900  |
| H  | -3.36803100 | -1.10157500 | 3.40129400  |
| H  | -0.53743400 | 0.86394800  | 4.84671700  |
| H  | 0.19749800  | 0.27795300  | 3.34443300  |
| H  | -0.31138300 | 1.97075800  | 3.49109000  |
| Co | -0.17651100 | -0.25892800 | 0.23797600  |
| C  | 0.99370300  | 4.84232600  | -1.57480600 |
| C  | 0.93854800  | 3.45038100  | -1.49880400 |
| C  | 0.74837200  | 2.81092800  | -0.24881700 |
| C  | 0.66898300  | 3.60318200  | 0.90160800  |
| C  | 0.76108100  | 4.98917900  | 0.83149200  |
| C  | 0.90825000  | 5.60267200  | -0.40979000 |
| H  | 1.11986000  | 5.33491300  | -2.53301900 |
| H  | 0.54766800  | 3.10635300  | 1.86141700  |
| H  | 0.71243900  | 5.58390700  | 1.73824500  |
| H  | 0.96287200  | 6.68528800  | -0.48035900 |
| C  | 0.70524800  | 1.36800600  | -0.20380700 |
| C  | 1.39419900  | 0.31604500  | -0.54877500 |
| C  | 2.69996700  | -0.13731000 | -1.03226800 |
| H  | 3.48032500  | 0.45767200  | -0.52277500 |
| H  | 2.79181700  | 0.06373100  | -2.10545800 |
| N  | 2.87783900  | -1.57700400 | -0.79139900 |
| C  | 2.29181100  | -2.03093500 | 0.48001900  |
| H  | 2.67620400  | -3.03931200 | 0.66935600  |
| H  | 2.59215600  | -1.38837000 | 1.32422000  |
| C  | 0.80516800  | -2.11213000 | 0.33943200  |
| C  | -0.09718800 | -1.95793300 | 1.39787200  |
| H  | 0.51371800  | -2.71102800 | -0.51913700 |
| H  | -1.02713000 | -2.52404900 | 1.40913200  |
| H  | 0.27663700  | -1.66406600 | 2.37858800  |

|   |            |             |             |
|---|------------|-------------|-------------|
| S | 4.42427900 | -2.14669300 | -1.14784100 |
| O | 4.37787200 | -3.59278100 | -0.95402600 |
| O | 4.76033300 | -1.55722400 | -2.44073400 |
| C | 5.50190300 | -1.45577600 | 0.07819900  |
| C | 5.68137000 | -2.12584200 | 1.29044300  |
| C | 6.10436400 | -0.21874900 | -0.15185600 |
| C | 6.47933400 | -1.55047600 | 2.26928700  |
| H | 5.21472400 | -3.09347300 | 1.45120900  |
| C | 6.89887100 | 0.34236500  | 0.84225200  |
| H | 5.96838500 | 0.28292100  | -1.10553500 |
| C | 7.10024500 | -0.30978100 | 2.06361900  |
| H | 6.63102200 | -2.07287300 | 3.21106700  |
| H | 7.37875100 | 1.30186800  | 0.66541700  |
| C | 7.97612500 | 0.28311100  | 3.12031000  |
| H | 8.20571300 | 1.33141200  | 2.91594000  |
| H | 7.51261200 | 0.21818400  | 4.10918900  |
| H | 8.92808400 | -0.25583800 | 3.18709200  |
| O | 1.04958300 | 2.62112200  | -2.56527900 |
| C | 1.15797900 | 3.21278300  | -3.85219100 |
| H | 0.28267200 | 3.83124200  | -4.08233400 |
| H | 2.06542900 | 3.82071400  | -3.94059900 |
| H | 1.21141000 | 2.38461300  | -4.55942500 |

#### M2R-F

|                                              |             |             |                             |
|----------------------------------------------|-------------|-------------|-----------------------------|
| Zero-point correction=                       |             |             | 0.762362 (Hartree/Particle) |
| Thermal correction to Energy=                |             |             | 0.810524                    |
| Thermal correction to Enthalpy=              |             |             | 0.811468                    |
| Thermal correction to Gibbs Free Energy=     |             |             | 0.682593                    |
| Sum of electronic and zero-point Energies=   |             |             | -3077.848360                |
| Sum of electronic and thermal Energies=      |             |             | -3077.800198                |
| Sum of electronic and thermal Enthalpies=    |             |             | -3077.799254                |
| Sum of electronic and thermal Free Energies= |             |             | -3077.928129                |
| C                                            | -7.23282800 | -3.27856500 | -0.01213900                 |
| C                                            | -6.12556200 | -3.01163200 | -0.78148000                 |
| C                                            | -5.15680000 | -2.09406800 | -0.31747600                 |
| C                                            | -5.33475100 | -1.45963400 | 0.95522100                  |
| C                                            | -6.48464000 | -1.75378900 | 1.72256200                  |
| C                                            | -7.41315400 | -2.64715700 | 1.24183400                  |
| H                                            | -7.98167800 | -3.98018400 | -0.36693500                 |
| H                                            | -5.96989100 | -3.48242500 | -1.74767500                 |
| H                                            | -6.60413200 | -1.26378000 | 2.68441800                  |
| H                                            | -8.29702600 | -2.87676500 | 1.82921800                  |
| C                                            | -3.35002700 | -0.36206900 | 0.67818700                  |
| C                                            | -3.19933300 | -0.95234500 | -0.61055900                 |



|    |             |             |             |
|----|-------------|-------------|-------------|
| N  | -4.40326000 | -0.59636100 | 1.43894300  |
| N  | -4.07733800 | -1.81380800 | -1.09185500 |
| P  | -2.00066700 | 0.74286400  | 1.28785900  |
| P  | -1.76552300 | -0.42826500 | -1.62652500 |
| C  | -2.77221000 | 2.39545800  | 1.30068800  |
| H  | -3.72691800 | 2.35550200  | 1.83112400  |
| H  | -2.11079400 | 3.11178100  | 1.79614000  |
| H  | -2.95259000 | 2.73487100  | 0.28026000  |
| C  | -1.24025000 | -1.97853200 | -2.42891400 |
| H  | -2.12238000 | -2.54324800 | -2.74239800 |
| H  | -0.62554400 | -1.75554300 | -3.30455500 |
| H  | -0.65416400 | -2.59656800 | -1.74541800 |
| C  | -2.51530600 | 0.57311300  | -3.03541800 |
| C  | -3.40806900 | 1.66359200  | -2.44845000 |
| C  | -1.34286000 | 1.20530700  | -3.78873800 |
| C  | -3.32659300 | -0.31089500 | -3.97966400 |
| H  | -4.25228000 | 1.24989600  | -1.88482800 |
| H  | -2.84991000 | 2.34104500  | -1.79604800 |
| H  | -3.82332900 | 2.26803800  | -3.26280900 |
| H  | -0.65149800 | 0.45226700  | -4.18355400 |
| H  | -1.72387700 | 1.77743800  | -4.64234600 |
| H  | -0.77283400 | 1.89205900  | -3.15450900 |
| H  | -3.77574600 | 0.32047800  | -4.75535300 |
| H  | -2.70262300 | -1.05473200 | -4.48364500 |
| H  | -4.13729700 | -0.83580600 | -3.46494100 |
| C  | -1.75027300 | 0.31911800  | 3.11369400  |
| C  | -2.85376700 | 0.96726400  | 3.95758100  |
| C  | -1.80197400 | -1.19389300 | 3.33455600  |
| C  | -0.39929600 | 0.89434400  | 3.54379700  |
| H  | -2.79317600 | 2.05878700  | 3.95619700  |
| H  | -3.85217300 | 0.66687000  | 3.62853300  |
| H  | -2.72728200 | 0.63410300  | 4.99411600  |
| H  | -1.13485300 | -1.75976900 | 2.67970500  |
| H  | -1.50361200 | -1.40486400 | 4.36741500  |
| H  | -2.81512700 | -1.58221300 | 3.20066000  |
| H  | -0.28063100 | 0.74607800  | 4.62304000  |
| H  | 0.44542000  | 0.41186800  | 3.04349800  |
| H  | -0.33392000 | 1.97108000  | 3.35000900  |
| Co | -0.37586000 | 0.65438200  | -0.15263200 |
| C  | 2.14106400  | 5.17542100  | 1.12413000  |
| C  | 2.20403800  | 3.78514300  | 1.15026100  |
| C  | 1.22517700  | 3.01627700  | 0.49945000  |
| C  | 0.22170600  | 3.72255800  | -0.16524400 |
| C  | 0.12778700  | 5.09438500  | -0.22303400 |

|   |             |             |             |
|---|-------------|-------------|-------------|
| C | 1.11071700  | 5.82747600  | 0.44652000  |
| H | 2.90239300  | 5.75671300  | 1.63540200  |
| H | 3.00312900  | 3.27443500  | 1.68130500  |
| H | -0.67767700 | 5.57213900  | -0.77011200 |
| H | 1.06655900  | 6.91197200  | 0.43196600  |
| C | 1.14810200  | 1.57012800  | 0.47630400  |
| C | 2.10325400  | 0.68939000  | 0.10156400  |
| C | 3.37057600  | 0.91263300  | -0.67087100 |
| H | 4.24873200  | 0.89431600  | -0.00580800 |
| H | 3.38861700  | 1.85774300  | -1.22018500 |
| N | 3.38278600  | -0.24595800 | -1.60440100 |
| C | 2.24174300  | -1.15088700 | -1.31330600 |
| H | 1.42356900  | -0.92303300 | -2.01270500 |
| H | 2.53069200  | -2.19467700 | -1.46142000 |
| C | 1.83702200  | -0.79525100 | 0.11440300  |
| C | 0.40135400  | -1.00723900 | 0.52797900  |
| H | 2.55210200  | -1.29465300 | 0.79476500  |
| H | 0.32451500  | -1.02298200 | 1.61548200  |
| H | -0.06799300 | -1.91253500 | 0.12874600  |
| S | 4.87590200  | -0.94297200 | -1.90328900 |
| O | 4.62437700  | -2.05681900 | -2.81405800 |
| O | 5.75762600  | 0.16422200  | -2.26243900 |
| C | 5.44153800  | -1.60519400 | -0.35685800 |
| C | 5.00608300  | -2.86489400 | 0.05759000  |
| C | 6.25513100  | -0.82403400 | 0.46665300  |
| C | 5.39309100  | -3.33752300 | 1.30608100  |
| H | 4.38729600  | -3.47081600 | -0.59811700 |
| C | 6.63310900  | -1.31412700 | 1.70973200  |
| H | 6.60129600  | 0.14555900  | 0.12108900  |
| C | 6.20879600  | -2.57445200 | 2.15107100  |
| H | 5.06424000  | -4.32155500 | 1.63182700  |
| H | 7.27436400  | -0.71227900 | 2.34924700  |
| C | 6.64286000  | -3.09898000 | 3.48206300  |
| H | 6.50319300  | -2.35548100 | 4.27268700  |
| H | 6.09421200  | -4.00205100 | 3.75978900  |
| H | 7.70942100  | -3.34982200 | 3.47599200  |
| F | -0.70846900 | 2.94955500  | -0.83011700 |

#### M2S-F

|                                            |                             |
|--------------------------------------------|-----------------------------|
| Zero-point correction=                     | 0.764251 (Hartree/Particle) |
| Thermal correction to Energy=              | 0.811766                    |
| Thermal correction to Enthalpy=            | 0.812710                    |
| Thermal correction to Gibbs Free Energy=   | 0.686462                    |
| Sum of electronic and zero-point Energies= | -3077.841527                |

|                                              |             |             |              |
|----------------------------------------------|-------------|-------------|--------------|
| Sum of electronic and thermal Energies=      |             |             | -3077.794012 |
| Sum of electronic and thermal Enthalpies=    |             |             | -3077.793068 |
| Sum of electronic and thermal Free Energies= |             |             | -3077.919315 |
| C                                            | -6.37877400 | -2.16707200 | -3.32849800  |
| C                                            | -5.31215300 | -1.30245600 | -3.25572000  |
| C                                            | -4.63542700 | -1.12997800 | -2.02733300  |
| C                                            | -5.05952900 | -1.87242600 | -0.87744800  |
| C                                            | -6.16021900 | -2.75232400 | -0.98383700  |
| C                                            | -6.80439100 | -2.89247400 | -2.19031200  |
| H                                            | -6.90535300 | -2.29826700 | -4.26910000  |
| H                                            | -4.97484800 | -0.73297500 | -4.11661500  |
| H                                            | -6.46634400 | -3.30663300 | -0.10146000  |
| H                                            | -7.64911200 | -3.56927400 | -2.27692300  |
| C                                            | -3.38036000 | -0.92679400 | 0.35216800   |
| C                                            | -3.00865300 | -0.13444400 | -0.77348400  |
| N                                            | -4.40235500 | -1.76268800 | 0.30670400   |
| N                                            | -3.60658900 | -0.24543300 | -1.94454700  |
| P                                            | -2.29551500 | -0.83358800 | 1.82897800   |
| P                                            | -1.70431700 | 1.14620000  | -0.55190500  |
| C                                            | -3.31975100 | -0.10414200 | 3.15753100   |
| H                                            | -4.33662900 | -0.50476900 | 3.14519000   |
| H                                            | -2.85545800 | -0.33736700 | 4.12023100   |
| H                                            | -3.36166400 | 0.98100900  | 3.06010900   |
| C                                            | -0.89905400 | 1.26555100  | -2.17263000  |
| H                                            | -1.57268300 | 1.70630500  | -2.91152700  |
| H                                            | 0.00324400  | 1.87439100  | -2.08533500  |
| H                                            | -0.62335100 | 0.26508800  | -2.51139500  |
| C                                            | -2.70084600 | 2.74763400  | -0.36761600  |
| C                                            | -3.35070200 | 2.76450000  | 1.01126500   |
| C                                            | -1.76120100 | 3.94069900  | -0.51315000  |
| C                                            | -3.79084600 | 2.82139600  | -1.43841500  |
| H                                            | -4.02683100 | 1.91327000  | 1.15104000   |
| H                                            | -2.60684200 | 2.76227900  | 1.81679800   |
| H                                            | -3.94726300 | 3.67697600  | 1.12175700   |
| H                                            | -1.19269400 | 3.92677100  | -1.44875200  |
| H                                            | -2.35951700 | 4.85851900  | -0.50882600  |
| H                                            | -1.05984400 | 4.00554400  | 0.31974100   |
| H                                            | -4.26626900 | 3.80595600  | -1.36185900  |
| H                                            | -3.40239100 | 2.72479400  | -2.45641300  |
| H                                            | -4.56964500 | 2.06893900  | -1.29569200  |
| C                                            | -2.06773800 | -2.62292700 | 2.41240000   |
| C                                            | -3.28860200 | -3.12175600 | 3.18641500   |
| C                                            | -1.83014900 | -3.56202400 | 1.23065200   |
| C                                            | -0.85056700 | -2.60649500 | 3.34086400   |

|    |             |             |             |
|----|-------------|-------------|-------------|
| H  | -3.44871400 | -2.57653400 | 4.12051600  |
| H  | -4.20237100 | -3.07095100 | 2.58871300  |
| H  | -3.12081300 | -4.17243400 | 3.45136200  |
| H  | -1.01150800 | -3.24727500 | 0.57836400  |
| H  | -1.57333200 | -4.55402000 | 1.61943200  |
| H  | -2.72969100 | -3.67279000 | 0.61919000  |
| H  | -0.70381400 | -3.60412000 | 3.76988800  |
| H  | 0.06996600  | -2.33317700 | 2.81293300  |
| H  | -0.98501800 | -1.90829600 | 4.17572500  |
| Co | -0.49235100 | 0.48840500  | 1.10906100  |
| C  | 1.57513700  | 5.33414700  | 0.51788700  |
| C  | 1.49854100  | 3.99896900  | 0.16290800  |
| C  | 1.16154600  | 2.97673600  | 1.06063300  |
| C  | 0.86214700  | 3.38652400  | 2.37325900  |
| C  | 0.92698500  | 4.72149700  | 2.75953500  |
| C  | 1.29017000  | 5.69730300  | 1.83267600  |
| H  | 1.84160600  | 6.06964600  | -0.23445900 |
| H  | 0.58691600  | 2.62213300  | 3.09907000  |
| H  | 0.70032100  | 4.99970000  | 3.78443400  |
| H  | 1.34607500  | 6.74150700  | 2.12487500  |
| C  | 1.04701900  | 1.57173500  | 0.66564000  |
| C  | 2.00809500  | 0.85079000  | 0.05792100  |
| C  | 3.36200400  | 1.18675800  | -0.48487800 |
| H  | 4.15928700  | 0.89527400  | 0.21645500  |
| H  | 3.50476000  | 2.23897200  | -0.73470700 |
| N  | 3.41340900  | 0.34929000  | -1.71918500 |
| C  | 2.24436200  | -0.57316300 | -1.77220300 |
| H  | 1.50682600  | -0.17258500 | -2.47668900 |
| H  | 2.54654200  | -1.55966100 | -2.13422300 |
| C  | 1.72706200  | -0.56290400 | -0.33594600 |
| C  | 0.29841700  | -0.93178900 | 0.01063400  |
| H  | 2.41122900  | -1.21096600 | 0.24127200  |
| H  | -0.30798500 | -1.24702900 | -0.84757900 |
| H  | 0.27996700  | -1.73746400 | 0.75352900  |
| S  | 4.90260600  | -0.29616900 | -2.12410500 |
| O  | 4.71783900  | -0.96400600 | -3.41017100 |
| O  | 5.86406800  | 0.78974300  | -1.95063000 |
| C  | 5.25476800  | -1.54416700 | -0.91145300 |
| C  | 4.78293000  | -2.84392200 | -1.10323500 |
| C  | 5.93472800  | -1.19907000 | 0.25936200  |
| C  | 4.98675500  | -3.79445200 | -0.10940900 |
| H  | 4.28112400  | -3.11026600 | -2.02923200 |
| C  | 6.13316000  | -2.16385300 | 1.23872700  |
| H  | 6.32186300  | -0.19206000 | 0.38526600  |

|   |            |             |             |
|---|------------|-------------|-------------|
| C | 5.66243900 | -3.47359900 | 1.07387100  |
| H | 4.62656200 | -4.80973000 | -0.25801800 |
| H | 6.67291700 | -1.90164200 | 2.14582000  |
| C | 5.90575800 | -4.50824600 | 2.12586800  |
| H | 5.66913700 | -4.13113600 | 3.12549600  |
| H | 5.31459700 | -5.41010800 | 1.94996300  |
| H | 6.96003400 | -4.80586800 | 2.14691800  |
| F | 1.71571100 | 3.67403000  | -1.13584700 |

### M2R-OMe

|                                              |             |             |                             |
|----------------------------------------------|-------------|-------------|-----------------------------|
| Zero-point correction=                       |             |             | 0.805501 (Hartree/Particle) |
| Thermal correction to Energy=                |             |             | 0.854220                    |
| Thermal correction to Enthalpy=              |             |             | 0.855164                    |
| Thermal correction to Gibbs Free Energy=     |             |             | 0.727599                    |
| Sum of electronic and zero-point Energies=   |             |             | -3093.110523                |
| Sum of electronic and thermal Energies=      |             |             | -3093.061805                |
| Sum of electronic and thermal Enthalpies=    |             |             | -3093.060861                |
| Sum of electronic and thermal Free Energies= |             |             | -3093.188425                |
| C                                            | -6.20545500 | -4.11498600 | -0.10588300                 |
| C                                            | -5.61838200 | -3.19905800 | -0.94628800                 |
| C                                            | -4.59836000 | -2.35274100 | -0.45390500                 |
| C                                            | -4.17266700 | -2.48235300 | 0.90747300                  |
| C                                            | -4.80446500 | -3.42402500 | 1.75107700                  |
| C                                            | -5.80290400 | -4.22298700 | 1.24701400                  |
| H                                            | -6.99292200 | -4.76339700 | -0.47839300                 |
| H                                            | -5.92317700 | -3.09348200 | -1.98351200                 |
| H                                            | -4.47303900 | -3.50016300 | 2.78267100                  |
| H                                            | -6.28846400 | -4.95213400 | 1.88867300                  |
| C                                            | -2.59236500 | -0.86495900 | 0.56139300                  |
| C                                            | -3.10201900 | -0.64681100 | -0.75085500                 |
| N                                            | -3.14322800 | -1.73636200 | 1.38346600                  |
| N                                            | -4.06201800 | -1.40017200 | -1.25980900                 |
| P                                            | -1.07843000 | 0.05358200  | 1.10950600                  |
| P                                            | -2.50503600 | 0.83326000  | -1.65018200                 |
| C                                            | -1.65869100 | 1.02227600  | 2.54001300                  |
| H                                            | -2.20806600 | 0.37746000  | 3.23097000                  |
| H                                            | -0.80726100 | 1.47030600  | 3.06127300                  |
| H                                            | -2.32174800 | 1.82079600  | 2.20178100                  |
| C                                            | -2.40259500 | 0.27154600  | -3.38281000                 |
| H                                            | -3.32060500 | -0.24949100 | -3.66508700                 |
| H                                            | -2.26022700 | 1.13336700  | -4.04052300                 |
| H                                            | -1.56166300 | -0.40931800 | -3.52248800                 |
| C                                            | -4.03777300 | 1.93567100  | -1.65292400                 |
| C                                            | -4.50744800 | 2.06612300  | -0.20129000                 |

|    |             |             |             |
|----|-------------|-------------|-------------|
| C  | -3.60561400 | 3.27000800  | -2.26700500 |
| C  | -5.18466600 | 1.37185900  | -2.48927500 |
| H  | -5.04937600 | 1.16673200  | 0.11296000  |
| H  | -3.68492500 | 2.20803800  | 0.50765700  |
| H  | -5.19061500 | 2.91659400  | -0.09727600 |
| H  | -3.40332900 | 3.15517300  | -3.33727700 |
| H  | -4.40952100 | 4.00801000  | -2.16396600 |
| H  | -2.70248000 | 3.68926300  | -1.81353900 |
| H  | -6.05396400 | 2.03113400  | -2.37638500 |
| H  | -4.94166800 | 1.33622700  | -3.55515200 |
| H  | -5.48213700 | 0.36944400  | -2.16870500 |
| C  | 0.01542800  | -1.29898200 | 1.86714400  |
| C  | -0.56731500 | -1.77614500 | 3.20414600  |
| C  | 0.09350800  | -2.47539500 | 0.89396500  |
| C  | 1.41274800  | -0.74841200 | 2.15380000  |
| H  | -0.51060100 | -1.00013600 | 3.97293300  |
| H  | -1.59948500 | -2.11996300 | 3.12270800  |
| H  | 0.04514800  | -2.61771600 | 3.54911900  |
| H  | 0.42075100  | -2.17234700 | -0.10582400 |
| H  | 0.82033500  | -3.20305300 | 1.27233400  |
| H  | -0.86702000 | -2.99102000 | 0.79797800  |
| H  | 1.93891900  | -1.47028600 | 2.78970000  |
| H  | 2.00572800  | -0.60835300 | 1.24930100  |
| H  | 1.38312400  | 0.20303600  | 2.69708100  |
| Co | -0.50449900 | 1.36601700  | -0.51619300 |
| C  | 2.64000400  | 4.04154600  | 2.82349800  |
| C  | 2.57869200  | 3.02905300  | 1.87176500  |
| C  | 1.41351000  | 2.80690200  | 1.12144300  |
| C  | 0.30156800  | 3.62701800  | 1.38509200  |
| C  | 0.34291000  | 4.63890200  | 2.33766000  |
| C  | 1.52454500  | 4.84175600  | 3.05277500  |
| H  | 3.55254200  | 4.19907100  | 3.39082500  |
| H  | 3.43820300  | 2.38234800  | 1.71631700  |
| H  | -0.51680900 | 5.26705100  | 2.53715400  |
| H  | 1.55990400  | 5.63005400  | 3.79918400  |
| C  | 1.24615400  | 1.75798000  | 0.13305100  |
| C  | 2.22178200  | 1.09745300  | -0.53014700 |
| C  | 3.69505300  | 1.33898400  | -0.67898000 |
| H  | 4.26400100  | 0.96672500  | 0.18592300  |
| H  | 3.95492500  | 2.39845100  | -0.79049800 |
| N  | 4.06622300  | 0.57936700  | -1.90225400 |
| C  | 2.83465200  | 0.05924700  | -2.54296500 |
| H  | 2.49705200  | 0.78910200  | -3.28930000 |
| H  | 3.04377800  | -0.87824000 | -3.06329600 |

|   |             |             |             |
|---|-------------|-------------|-------------|
| C | 1.82176500  | -0.04692600 | -1.39758400 |
| C | 0.35727300  | 0.09649800  | -1.72667700 |
| H | 2.01801600  | -0.99037600 | -0.86065600 |
| H | -0.16204100 | -0.85204300 | -1.90495000 |
| H | 0.23436600  | 0.74578600  | -2.61181000 |
| S | 5.34774800  | -0.49540900 | -1.74678700 |
| O | 5.53683100  | -1.08474300 | -3.06972900 |
| O | 6.40879100  | 0.25225400  | -1.07695200 |
| C | 4.80767000  | -1.78171500 | -0.64825400 |
| C | 4.08804500  | -2.86276600 | -1.16034700 |
| C | 5.02695500  | -1.65745800 | 0.72572800  |
| C | 3.57584300  | -3.81316800 | -0.28427200 |
| H | 3.94319200  | -2.96198600 | -2.23244700 |
| C | 4.51575700  | -2.62274200 | 1.58426600  |
| H | 5.60824200  | -0.82362700 | 1.10902700  |
| C | 3.77705400  | -3.70905200 | 1.09768000  |
| H | 3.01224800  | -4.65630100 | -0.67768100 |
| H | 4.69048300  | -2.53415200 | 2.65432200  |
| C | 3.23163600  | -4.73653600 | 2.03756800  |
| H | 2.73181300  | -4.27198200 | 2.89442300  |
| H | 2.51883900  | -5.40096000 | 1.54297100  |
| H | 4.03354100  | -5.36065300 | 2.44793100  |
| O | -0.81662800 | 3.33456700  | 0.61985100  |
| C | -1.92742600 | 4.21895300  | 0.81212000  |
| H | -2.31513100 | 4.14303000  | 1.83394700  |
| H | -1.62878100 | 5.25082200  | 0.60636600  |
| H | -2.69583800 | 3.92078200  | 0.10874900  |

### M2S-OMe

|                                              |             |             |                             |
|----------------------------------------------|-------------|-------------|-----------------------------|
| Zero-point correction=                       |             |             | 0.805456 (Hartree/Particle) |
| Thermal correction to Energy=                |             |             | 0.854480                    |
| Thermal correction to Enthalpy=              |             |             | 0.855424                    |
| Thermal correction to Gibbs Free Energy=     |             |             | 0.726216                    |
| Sum of electronic and zero-point Energies=   |             |             | -3093.089444                |
| Sum of electronic and thermal Energies=      |             |             | -3093.040421                |
| Sum of electronic and thermal Enthalpies=    |             |             | -3093.039476                |
| Sum of electronic and thermal Free Energies= |             |             | -3093.168685                |
| C                                            | -6.28678700 | -2.08947300 | -3.58678700                 |
| C                                            | -5.18533200 | -1.27976800 | -3.43992300                 |
| C                                            | -4.60713300 | -1.11151200 | -2.16165400                 |
| C                                            | -5.16191000 | -1.80799300 | -1.03884500                 |
| C                                            | -6.30047300 | -2.62544300 | -1.22022500                 |
| C                                            | -6.85006300 | -2.75762300 | -2.47378800                 |
| H                                            | -6.73816100 | -2.21609200 | -4.56614400                 |

|    |             |             |             |
|----|-------------|-------------|-------------|
| H  | -4.74552500 | -0.74964700 | -4.27960100 |
| H  | -6.71036900 | -3.14043000 | -0.35614200 |
| H  | -7.72367700 | -3.38612600 | -2.61842800 |
| C  | -3.52579500 | -0.94328400 | 0.30426200  |
| C  | -3.04826500 | -0.16290900 | -0.79134000 |
| N  | -4.58457400 | -1.72438000 | 0.18883400  |
| N  | -3.55670400 | -0.26264700 | -2.00474900 |
| P  | -2.51425700 | -0.93804000 | 1.83877700  |
| P  | -1.73455100 | 1.08586800  | -0.46895200 |
| C  | -3.58049200 | -0.21494800 | 3.13761600  |
| H  | -4.61083300 | -0.57056100 | 3.05426500  |
| H  | -3.18157900 | -0.50633800 | 4.11356300  |
| H  | -3.57111600 | 0.87398300  | 3.08270300  |
| C  | -0.84861700 | 1.24121800  | -2.04350000 |
| H  | -1.47544100 | 1.72826800  | -2.79468800 |
| H  | 0.06440800  | 1.82098800  | -1.88356400 |
| H  | -0.58591000 | 0.24733200  | -2.41111000 |
| C  | -2.71947100 | 2.69712900  | -0.29363000 |
| C  | -3.42377700 | 2.70191700  | 1.05842500  |
| C  | -1.76016800 | 3.88019200  | -0.38611900 |
| C  | -3.76265400 | 2.79920000  | -1.40761100 |
| H  | -4.12837400 | 1.86757600  | 1.15137800  |
| H  | -2.71377900 | 2.66018800  | 1.89285400  |
| H  | -4.00010600 | 3.62776200  | 1.16567300  |
| H  | -1.17984500 | 3.88259000  | -1.31480700 |
| H  | -2.34603900 | 4.80600800  | -0.36361200 |
| H  | -1.06831000 | 3.90892300  | 0.45704900  |
| H  | -4.23444900 | 3.78577700  | -1.33487300 |
| H  | -3.33144500 | 2.71644600  | -2.40953100 |
| H  | -4.55120500 | 2.04917600  | -1.31209500 |
| C  | -2.38964100 | -2.75369300 | 2.36973100  |
| C  | -3.67269800 | -3.22755600 | 3.05406200  |
| C  | -2.12065900 | -3.66293000 | 1.17219000  |
| C  | -1.22742000 | -2.81330800 | 3.36467100  |
| H  | -3.87685800 | -2.69578300 | 3.98726100  |
| H  | -4.54323700 | -3.13229300 | 2.39896600  |
| H  | -3.55750600 | -4.28872500 | 3.30565500  |
| H  | -1.24919100 | -3.36469400 | 0.58403200  |
| H  | -1.93322200 | -4.67856100 | 1.53875900  |
| H  | -2.98358100 | -3.71167600 | 0.50233200  |
| H  | -1.14263800 | -3.82835000 | 3.76932600  |
| H  | -0.26875200 | -2.56060200 | 2.89742500  |
| H  | -1.38197700 | -2.13512200 | 4.21270800  |
| Co | -0.63149500 | 0.34181800  | 1.22885500  |



|   |             |             |             |
|---|-------------|-------------|-------------|
| C | 1.58287300  | 5.12873400  | 0.76378900  |
| C | 1.47949000  | 3.79659500  | 0.36393400  |
| C | 1.08144700  | 2.79287200  | 1.28291800  |
| C | 0.74906500  | 3.19970200  | 2.58289100  |
| C | 0.83714800  | 4.53039000  | 2.98585300  |
| C | 1.26369600  | 5.48976100  | 2.07308800  |
| H | 1.89942500  | 5.88997000  | 0.05845300  |
| H | 0.43020300  | 2.43663600  | 3.29261000  |
| H | 0.58571400  | 4.81096700  | 4.00430000  |
| H | 1.34647400  | 6.53164300  | 2.37032400  |
| C | 0.95504000  | 1.38858700  | 0.88865800  |
| C | 1.92829800  | 0.63710600  | 0.34221100  |
| C | 3.31939400  | 0.93599400  | -0.11936800 |
| H | 4.06672600  | 0.51839800  | 0.57556500  |
| H | 3.53626000  | 1.99343300  | -0.26935600 |
| N | 3.34310600  | 0.21331900  | -1.42173300 |
| C | 2.21647300  | -0.75676400 | -1.51564800 |
| H | 1.49699800  | -0.39901900 | -2.26106500 |
| H | 2.57194000  | -1.73961800 | -1.84092800 |
| C | 1.62690500  | -0.75689000 | -0.10522300 |
| C | 0.16526400  | -1.07932800 | 0.13362600  |
| H | 2.24702200  | -1.44547200 | 0.49464400  |
| H | -0.39273700 | -1.33571800 | -0.77553000 |
| H | 0.06269000  | -1.91166600 | 0.83906300  |
| S | 4.83214500  | -0.28530000 | -1.98514600 |
| O | 4.59409900  | -0.85694400 | -3.30890300 |
| O | 5.73329500  | 0.84741700  | -1.78605900 |
| C | 5.36050200  | -1.60054600 | -0.91457100 |
| C | 5.00554300  | -2.91749100 | -1.21084600 |
| C | 6.06184900  | -1.29835100 | 0.25589600  |
| C | 5.35253000  | -3.93088500 | -0.32427400 |
| H | 4.48489900  | -3.14518600 | -2.13656800 |
| C | 6.40069800  | -2.32411300 | 1.12859300  |
| H | 6.35481400  | -0.27312700 | 0.46299200  |
| C | 6.05014100  | -3.65373400 | 0.85694200  |
| H | 5.08537400  | -4.95928500 | -0.55532200 |
| H | 6.95457800  | -2.09361900 | 2.03576000  |
| C | 6.43739100  | -4.74931900 | 1.79813400  |
| H | 6.21398200  | -4.48527900 | 2.83626000  |
| H | 5.92235200  | -5.68417400 | 1.56396200  |
| H | 7.51441900  | -4.94631300 | 1.75202100  |
| O | 1.70394200  | 3.37340300  | -0.90874600 |
| C | 2.15744400  | 4.32764100  | -1.85639200 |
| H | 3.10761100  | 4.77909800  | -1.54804200 |

|   |            |            |             |
|---|------------|------------|-------------|
| H | 2.30776200 | 3.77572500 | -2.78511300 |
| H | 1.41788700 | 5.12080000 | -2.02076700 |

### TS2R-F

|                                              |                           |             |                             |
|----------------------------------------------|---------------------------|-------------|-----------------------------|
| Zero-point correction=                       |                           |             | 0.963863 (Hartree/Particle) |
| Thermal correction to Energy=                |                           |             | 1.021709                    |
| Thermal correction to Enthalpy=              |                           |             | 1.022654                    |
| Thermal correction to Gibbs Free Energy=     |                           |             | 0.877830                    |
| Sum of electronic and zero-point Energies=   |                           |             | -3688.507908                |
| Sum of electronic and thermal Energies=      |                           |             | -3688.450062                |
| Sum of electronic and thermal Enthalpies=    |                           |             | -3688.449117                |
| Sum of electronic and thermal Free Energies= |                           |             | -3688.593940                |
| Imaginary frequency=                         | -1261.61 cm <sup>-1</sup> |             |                             |
| C                                            | -3.51633800               | 5.51009900  | -0.80269200                 |
| C                                            | -3.38676600               | 4.37560200  | -0.03532400                 |
| C                                            | -2.11377200               | 3.78525000  | 0.12898200                  |
| C                                            | -0.97362900               | 4.37631500  | -0.49679400                 |
| C                                            | -1.13642100               | 5.54016900  | -1.27952600                 |
| C                                            | -2.38874200               | 6.09215300  | -1.42690300                 |
| H                                            | -4.49270800               | 5.96608000  | -0.93603500                 |
| H                                            | -4.23971700               | 3.90470300  | 0.44586700                  |
| H                                            | -0.25950600               | 5.97102400  | -1.75497800                 |
| H                                            | -2.51808400               | 6.98619500  | -2.02974900                 |
| C                                            | 0.35562000                | 2.70901200  | 0.33474900                  |
| C                                            | -0.79830600               | 2.09273100  | 0.93488500                  |
| N                                            | 0.26287100                | 3.82375000  | -0.36261700                 |
| N                                            | -1.99521200               | 2.63797400  | 0.84832900                  |
| P                                            | 1.95798300                | 1.82068100  | 0.49366600                  |
| P                                            | -0.63407700               | 0.42529500  | 1.72783000                  |
| C                                            | 2.45640300                | 2.27328500  | 2.19388400                  |
| H                                            | 2.37152800                | 3.34807000  | 2.36847900                  |
| H                                            | 3.48655500                | 1.95741200  | 2.37758600                  |
| H                                            | 1.82599500                | 1.75892200  | 2.91075000                  |
| C                                            | -2.18926200               | -0.43165200 | 1.29368500                  |
| H                                            | -2.99793700               | 0.29934000  | 1.24241200                  |
| H                                            | -2.41483600               | -1.16622000 | 2.06860700                  |
| H                                            | -2.12087600               | -0.93480900 | 0.33581600                  |
| C                                            | -1.05533400               | 0.69740300  | 3.61113900                  |
| C                                            | -0.15440300               | 1.71709600  | 4.30309100                  |
| C                                            | -0.98816300               | -0.64807100 | 4.33877500                  |
| C                                            | -2.49668600               | 1.21626800  | 3.71943000                  |
| H                                            | -0.08684500               | 2.66033200  | 3.75052800                  |
| H                                            | 0.85615600                | 1.34942500  | 4.49719600                  |
| H                                            | -0.58558800               | 1.94608300  | 5.28377200                  |

|    |             |             |             |
|----|-------------|-------------|-------------|
| H  | -1.71238400 | -1.37008600 | 3.95063200  |
| H  | -1.24031500 | -0.48088900 | 5.39247700  |
| H  | -0.00250200 | -1.11882000 | 4.31294500  |
| H  | -2.68205800 | 1.45948600  | 4.77201100  |
| H  | -3.23570800 | 0.46488700  | 3.43264400  |
| H  | -2.67249100 | 2.11976000  | 3.13024400  |
| C  | 3.31858600  | 2.70915700  | -0.48549900 |
| C  | 3.51200900  | 4.14159000  | 0.01642100  |
| C  | 3.04628000  | 2.72850500  | -1.98315800 |
| C  | 4.60071500  | 1.90427700  | -0.24586300 |
| H  | 3.85419500  | 4.18181800  | 1.05363000  |
| H  | 2.60034400  | 4.73656800  | -0.07887000 |
| H  | 4.28819600  | 4.61560700  | -0.59595200 |
| H  | 3.04583200  | 1.71645900  | -2.39573900 |
| H  | 3.85563600  | 3.27995100  | -2.47610200 |
| H  | 2.10217800  | 3.21673800  | -2.23588500 |
| H  | 5.42449900  | 2.39237800  | -0.77896100 |
| H  | 4.51570500  | 0.88526500  | -0.63555200 |
| H  | 4.88607600  | 1.85124900  | 0.80950000  |
| Co | 1.23362900  | -0.44138700 | 0.51565600  |
| C  | -2.06299100 | 2.17596700  | -2.92236600 |
| C  | -1.69229900 | 1.14006800  | -2.08064300 |
| C  | -0.41102700 | 0.56851300  | -2.05618400 |
| C  | 0.48591100  | 1.09663000  | -2.99487500 |
| C  | 0.14585700  | 2.13042700  | -3.86085500 |
| C  | -1.13016400 | 2.68446300  | -3.82044100 |
| H  | -3.07640500 | 2.56099400  | -2.86296000 |
| H  | 1.48145600  | 0.67408300  | -3.03879400 |
| H  | 0.88555500  | 2.50326100  | -4.56350700 |
| H  | -1.40429000 | 3.50312900  | -4.47928500 |
| C  | -0.03631600 | -0.53833700 | -1.14741000 |
| C  | -0.57828600 | -1.76767800 | -1.26176800 |
| C  | -1.70538000 | -2.25523600 | -2.11893000 |
| H  | -2.54914300 | -1.55211400 | -2.09594600 |
| H  | -1.42421400 | -2.39195300 | -3.16976500 |
| N  | -2.04942400 | -3.56759700 | -1.51413900 |
| C  | -1.37675700 | -3.72129900 | -0.20542300 |
| H  | -1.18986600 | -4.77811500 | -0.00709900 |
| H  | -1.99022100 | -3.31330700 | 0.61569500  |
| C  | -0.11369000 | -2.87923800 | -0.37207700 |
| C  | 0.53017800  | -2.32393200 | 0.87936300  |
| H  | 0.61749900  | -3.47298600 | -0.94467600 |
| H  | 1.37377800  | -2.93365800 | 1.21697000  |
| H  | -0.18756300 | -2.25840200 | 1.70484500  |

|   |             |             |             |
|---|-------------|-------------|-------------|
| S | -3.66239400 | -4.01494100 | -1.57950600 |
| O | -3.73754200 | -5.32298500 | -0.93450100 |
| O | -4.08129400 | -3.81252000 | -2.96387700 |
| C | -4.53109000 | -2.84532900 | -0.56353100 |
| C | -4.65140700 | -3.07698400 | 0.80808100  |
| C | -4.99957700 | -1.65555200 | -1.12760500 |
| C | -5.22915100 | -2.10127200 | 1.61427500  |
| H | -4.30811800 | -4.01596700 | 1.23253600  |
| C | -5.57098400 | -0.69293900 | -0.30657100 |
| H | -4.92428300 | -1.49519500 | -2.19939800 |
| C | -5.68338400 | -0.89182500 | 1.07598900  |
| H | -5.32254400 | -2.27587800 | 2.68414500  |
| H | -5.93038800 | 0.23657700  | -0.74272400 |
| C | -6.25413200 | 0.17962000  | 1.94879800  |
| H | -5.64312700 | 1.08970000  | 1.90374800  |
| H | -6.30985400 | -0.13454700 | 2.99383800  |
| H | -7.26092900 | 0.46613100  | 1.62764400  |
| C | 4.90752300  | -1.85980900 | -0.72150000 |
| C | 4.54243700  | -1.61637200 | -2.06759300 |
| C | 5.48171900  | -1.78774000 | -3.09219800 |
| C | 6.77246000  | -2.16775700 | -2.75861900 |
| C | 7.13564500  | -2.35429500 | -1.41769000 |
| C | 6.21974400  | -2.19788400 | -0.38230600 |
| C | 2.73433900  | -1.11574100 | -0.77349900 |
| C | 3.19110100  | -1.15535500 | -2.06754500 |
| H | 5.19935800  | -1.60836100 | -4.12597200 |
| H | 7.51582400  | -2.30427900 | -3.53842800 |
| H | 8.15888400  | -2.62192900 | -1.17149300 |
| H | 6.55472000  | -2.31793600 | 0.63977000  |
| H | 1.44020900  | -1.03296300 | -0.94211000 |
| H | 2.60663400  | -0.92074200 | -2.94636200 |
| N | 3.76969600  | -1.60231500 | 0.06241100  |
| C | 3.65991200  | -1.59448400 | 1.44191700  |
| C | 4.51808700  | -2.29390800 | 2.29577900  |
| N | 2.60415300  | -0.89377400 | 1.91431000  |
| C | 4.32518900  | -2.20147000 | 3.66361900  |
| H | 5.28360800  | -2.94087300 | 1.89325200  |
| C | 2.43369500  | -0.82329800 | 3.24474500  |
| C | 3.27593600  | -1.43022200 | 4.15706500  |
| H | 4.98054900  | -2.74516800 | 4.33652200  |
| H | 1.57309900  | -0.25514000 | 3.56792800  |
| H | 3.08679700  | -1.32601700 | 5.21928500  |
| F | -2.64443400 | 0.65865000  | -1.24718800 |

**TS2S-F**

|                                              |             |                  |                             |
|----------------------------------------------|-------------|------------------|-----------------------------|
| Zero-point correction=                       |             |                  | 0.961082 (Hartree/Particle) |
| Thermal correction to Energy=                |             |                  | 1.019930                    |
| Thermal correction to Enthalpy=              |             |                  | 1.020874                    |
| Thermal correction to Gibbs Free Energy=     |             |                  | 0.869165                    |
| Sum of electronic and zero-point Energies=   |             |                  | -3688.504137                |
| Sum of electronic and thermal Energies=      |             |                  | -3688.445290                |
| Sum of electronic and thermal Enthalpies=    |             |                  | -3688.444346                |
| Sum of electronic and thermal Free Energies= |             |                  | -3688.596054                |
| Imaginary frequency=                         | -1068.73    | cm <sup>-1</sup> |                             |
| C                                            | 4.25461300  | -6.46048800      | 0.25813500                  |
| C                                            | 3.12026600  | -5.83069000      | -0.19826200                 |
| C                                            | 3.07479400  | -4.41890900      | -0.23876200                 |
| C                                            | 4.20837800  | -3.66232400      | 0.18698700                  |
| C                                            | 5.35722700  | -4.33657400      | 0.65872200                  |
| C                                            | 5.37437300  | -5.71150500      | 0.68937300                  |
| H                                            | 4.29521300  | -7.54511000      | 0.29235000                  |
| H                                            | 2.24710100  | -6.38793000      | -0.52555800                 |
| H                                            | 6.20956800  | -3.74546000      | 0.98132900                  |
| H                                            | 6.25706800  | -6.23367500      | 1.04685700                  |
| C                                            | 3.10268100  | -1.71728200      | -0.30406100                 |
| C                                            | 1.94902000  | -2.47130000      | -0.67591700                 |
| N                                            | 4.19844200  | -2.30420100      | 0.13192200                  |
| N                                            | 1.94452600  | -3.78922500      | -0.65340600                 |
| P                                            | 2.99406800  | 0.11232200       | -0.49194500                 |
| P                                            | 0.34546200  | -1.62454800      | -1.05833600                 |
| C                                            | 3.67173100  | 0.20768500       | -2.19424800                 |
| H                                            | 4.65014600  | -0.27859100      | -2.23854100                 |
| H                                            | 3.76728100  | 1.24213500       | -2.53169000                 |
| H                                            | 3.00588800  | -0.31766100      | -2.88283800                 |
| C                                            | -0.68974000 | -2.57848700      | 0.12137800                  |
| H                                            | -0.45193300 | -3.63587000      | -0.01039100                 |
| H                                            | -1.75819900 | -2.43095000      | -0.05115700                 |
| H                                            | -0.44879500 | -2.29699200      | 1.14449800                  |
| C                                            | -0.17494200 | -2.39108300      | -2.73807800                 |
| C                                            | 1.03322900  | -2.47737600      | -3.67116100                 |
| C                                            | -1.28044900 | -1.52410000      | -3.34147900                 |
| C                                            | -0.73511200 | -3.80489600      | -2.56318400                 |
| H                                            | 1.76603000  | -3.20573400      | -3.31107300                 |
| H                                            | 1.55602600  | -1.52652000      | -3.81150200                 |
| H                                            | 0.69912700  | -2.80790000      | -4.66137900                 |
| H                                            | -2.14984100 | -1.45676700      | -2.67696400                 |
| H                                            | -1.62423900 | -1.98356200      | -4.27572900                 |
| H                                            | -0.95631700 | -0.50713300      | -3.57660700                 |

|    |             |             |             |
|----|-------------|-------------|-------------|
| H  | -0.95903200 | -4.20408300 | -3.55983200 |
| H  | -1.66796600 | -3.81417700 | -1.99226800 |
| H  | -0.02185800 | -4.47930000 | -2.08311700 |
| C  | 4.36571300  | 0.91907300  | 0.52760000  |
| C  | 5.76365200  | 0.35749500  | 0.25906100  |
| C  | 4.01790300  | 0.75942000  | 2.00508800  |
| C  | 4.38883800  | 2.40077400  | 0.13849900  |
| H  | 6.06075200  | 0.46721500  | -0.78834000 |
| H  | 5.85710500  | -0.69162300 | 0.53675100  |
| H  | 6.47686200  | 0.94073100  | 0.85464100  |
| H  | 3.04900600  | 1.20931000  | 2.24843400  |
| H  | 4.77803800  | 1.25940900  | 2.61676000  |
| H  | 3.99278100  | -0.29416300 | 2.30186600  |
| H  | 5.11468400  | 2.91868600  | 0.77618000  |
| H  | 3.42609800  | 2.89334800  | 0.27404700  |
| H  | 4.71035200  | 2.54525600  | -0.89853600 |
| Co | 0.63036200  | 0.71540000  | -0.52226100 |
| C  | 1.77274200  | -0.96357900 | 4.26667400  |
| C  | 1.23777100  | -0.81160000 | 2.99836400  |
| C  | 0.27998900  | 0.14738800  | 2.66515500  |
| C  | -0.13925200 | 0.97926400  | 3.72263300  |
| C  | 0.37946500  | 0.85667200  | 5.00639300  |
| C  | 1.33999300  | -0.11639300 | 5.28123800  |
| H  | 2.51522100  | -1.73623900 | 4.43767000  |
| H  | -0.88173100 | 1.74465700  | 3.50758000  |
| H  | 0.03351500  | 1.52105300  | 5.79255400  |
| H  | 1.75174700  | -0.21918100 | 6.28056600  |
| C  | -0.30876700 | 0.28767300  | 1.31916300  |
| C  | -1.63534700 | 0.14923600  | 1.12479200  |
| C  | -2.74668600 | -0.22055000 | 2.06782000  |
| H  | -2.68591500 | -1.25203000 | 2.43399600  |
| H  | -2.77276000 | 0.42329800  | 2.95360300  |
| N  | -4.00041200 | -0.00495900 | 1.28583200  |
| C  | -3.63591800 | 0.83922900  | 0.11791200  |
| H  | -3.65592500 | 1.88739800  | 0.43936300  |
| H  | -4.36541500 | 0.71696900  | -0.68699500 |
| C  | -2.21844900 | 0.38143700  | -0.22667800 |
| C  | -1.28322400 | 1.21522400  | -1.04801400 |
| H  | -2.33214200 | -0.60227200 | -0.70563200 |
| H  | -1.38739800 | 2.28754500  | -0.83106500 |
| H  | -1.40482100 | 1.06543200  | -2.12371400 |
| S  | -4.79226100 | -1.44476300 | 0.85690800  |
| O  | -4.88634000 | -2.21687400 | 2.09595000  |
| O  | -4.20734000 | -2.07895200 | -0.33598100 |

|   |              |             |             |
|---|--------------|-------------|-------------|
| C | -6.38807200  | -0.82389000 | 0.40278300  |
| C | -7.24084900  | -0.35125100 | 1.40190500  |
| C | -6.78036400  | -0.83976600 | -0.93252100 |
| C | -8.49894000  | 0.11101900  | 1.04750600  |
| H | -6.92006700  | -0.35221300 | 2.43958800  |
| C | -8.04522100  | -0.36798900 | -1.26908800 |
| H | -6.10235000  | -1.22004900 | -1.69040000 |
| C | -8.92216400  | 0.11106200  | -0.29086000 |
| H | -9.17200500  | 0.47705600  | 1.81916800  |
| H | -8.36009100  | -0.37581300 | -2.30953600 |
| C | -10.28044600 | 0.61780800  | -0.65545600 |
| H | -10.37695700 | 1.68641400  | -0.43439700 |
| H | -11.06291100 | 0.11092800  | -0.08179500 |
| H | -10.49313400 | 0.47615900  | -1.71763300 |
| C | 1.46102700   | 4.72506000  | -0.15861300 |
| C | 1.55399000   | 4.52459100  | 1.24247700  |
| C | 1.94791300   | 5.57807600  | 2.07764200  |
| C | 2.26529800   | 6.80071100  | 1.50722800  |
| C | 2.21154600   | 6.97266600  | 0.11681900  |
| C | 1.81885600   | 5.94557200  | -0.73520600 |
| C | 0.95998000   | 2.53149800  | 0.31160600  |
| C | 1.24379600   | 3.15652100  | 1.50383700  |
| H | 2.01230800   | 5.42605300  | 3.15154400  |
| H | 2.57231300   | 7.63011800  | 2.13754600  |
| H | 2.48639800   | 7.93068600  | -0.31494900 |
| H | 1.81811300   | 6.12023500  | -1.80313300 |
| H | 0.06292300   | 1.61232900  | 0.67712500  |
| H | 1.21810200   | 2.68752100  | 2.47770700  |
| N | 1.04548500   | 3.50487100  | -0.71368900 |
| C | 0.98295000   | 3.11868900  | -2.04168300 |
| C | 0.86252600   | 4.00799100  | -3.11344700 |
| N | 1.00187100   | 1.77781100  | -2.22710100 |
| C | 0.83386000   | 3.50278100  | -4.40245300 |
| H | 0.74805900   | 5.06755900  | -2.93714700 |
| C | 0.95713400   | 1.31144000  | -3.48530400 |
| C | 0.90287600   | 2.12606700  | -4.60108600 |
| H | 0.74057400   | 4.18259700  | -5.24338400 |
| H | 0.95971800   | 0.23382800  | -3.57827200 |
| H | 0.88443300   | 1.68632800  | -5.59143400 |
| F | 1.68129500   | -1.65127300 | 2.02844100  |

#### TS2R-OMe

|                               |                             |
|-------------------------------|-----------------------------|
| Zero-point correction=        | 1.004097 (Hartree/Particle) |
| Thermal correction to Energy= | 1.063890                    |

|                                              |             |                  |              |
|----------------------------------------------|-------------|------------------|--------------|
| Thermal correction to Enthalpy=              |             |                  | 1.064834     |
| Thermal correction to Gibbs Free Energy=     |             |                  | 0.914787     |
| Sum of electronic and zero-point Energies=   |             |                  | -3703.755735 |
| Sum of electronic and thermal Energies=      |             |                  | -3703.695942 |
| Sum of electronic and thermal Enthalpies=    |             |                  | -3703.694997 |
| Sum of electronic and thermal Free Energies= |             |                  | -3703.845045 |
| Imaginary frequency=                         | -1162.93    | cm <sup>-1</sup> |              |
| C                                            | -2.81522000 | 6.02149900       | -0.80666300  |
| C                                            | -2.80324100 | 4.89683400       | -0.01336400  |
| C                                            | -1.62410600 | 4.12391200       | 0.08867500   |
| C                                            | -0.44939000 | 4.53765700       | -0.60889000  |
| C                                            | -0.49381700 | 5.68724500       | -1.42783100  |
| C                                            | -1.66025000 | 6.41092500       | -1.52384700  |
| H                                            | -3.72001900 | 6.61615100       | -0.88940600  |
| H                                            | -3.68251600 | 4.57492800       | 0.53827400   |
| H                                            | 0.40490500  | 5.97361900       | -1.96716800  |
| H                                            | -1.69715900 | 7.29604800       | -2.15175400  |
| C                                            | 0.69177300  | 2.74535000       | 0.24291900   |
| C                                            | -0.51246100 | 2.28583700       | 0.88769100   |
| N                                            | 0.71085200  | 3.83657500       | -0.49653500  |
| N                                            | -1.63295100 | 2.97672300       | 0.82021500   |
| P                                            | 2.19925300  | 1.70718700       | 0.42204600   |
| P                                            | -0.51362700 | 0.64167900       | 1.74995500   |
| C                                            | 2.77367300  | 2.20168200       | 2.09149500   |
| H                                            | 2.73089100  | 3.28434400       | 2.22881500   |
| H                                            | 3.80148000  | 1.86300300       | 2.24531800   |
| H                                            | 2.16098200  | 1.73483300       | 2.85428200   |
| C                                            | -2.15463500 | -0.09789700      | 1.40739000   |
| H                                            | -2.88771900 | 0.70051500       | 1.27544800   |
| H                                            | -2.44785800 | -0.71284200      | 2.26098500   |
| H                                            | -2.14191700 | -0.70912700      | 0.51063800   |
| C                                            | -0.85438200 | 1.07392300       | 3.62192600   |
| C                                            | 0.17286000  | 2.02351000       | 4.23221300   |
| C                                            | -0.92308300 | -0.21830000      | 4.43985100   |
| C                                            | -2.22209900 | 1.76629600       | 3.71997000   |
| H                                            | 0.34248200  | 2.90973700       | 3.61229400   |
| H                                            | 1.13565500  | 1.55162500       | 4.44197100   |
| H                                            | -0.21134700 | 2.37129300       | 5.19762800   |
| H                                            | -1.71378200 | -0.89282700      | 4.09932300   |
| H                                            | -1.15749800 | 0.04681900       | 5.47725600   |
| H                                            | 0.01085300  | -0.78456100      | 4.45661200   |
| H                                            | -2.37759400 | 2.03790300       | 4.77065400   |
| H                                            | -3.05153100 | 1.11623900       | 3.43350400   |
| H                                            | -2.27849200 | 2.68138300       | 3.12611300   |



|    |             |             |             |
|----|-------------|-------------|-------------|
| C  | 3.63108200  | 2.41680600  | -0.60894500 |
| C  | 3.98542800  | 3.82929300  | -0.13451100 |
| C  | 3.33960300  | 2.45328300  | -2.10257100 |
| C  | 4.82643500  | 1.48424700  | -0.38098700 |
| H  | 4.37240900  | 3.84632200  | 0.88718800  |
| H  | 3.13308600  | 4.51103100  | -0.20040600 |
| H  | 4.77751500  | 4.21959200  | -0.78418600 |
| H  | 3.24651700  | 1.44629600  | -2.51523900 |
| H  | 4.18759700  | 2.93183400  | -2.60685900 |
| H  | 2.43915300  | 3.02179400  | -2.34357300 |
| H  | 5.69539000  | 1.89965100  | -0.90449500 |
| H  | 4.64666400  | 0.48438100  | -0.78939700 |
| H  | 5.10701900  | 1.38469500  | 0.67260600  |
| Co | 1.23345600  | -0.45773800 | 0.57178700  |
| C  | -1.76433600 | 2.31450500  | -3.05288700 |
| C  | -1.56770400 | 1.30383800  | -2.10773800 |
| C  | -0.33283700 | 0.61139000  | -2.02425600 |
| C  | 0.65027800  | 0.97437000  | -2.94650600 |
| C  | 0.46249000  | 1.97025000  | -3.90075000 |
| C  | -0.74880900 | 2.64867900  | -3.94518700 |
| H  | -2.71236400 | 2.84071100  | -3.09665100 |
| H  | 1.59513300  | 0.44727100  | -2.90488400 |
| H  | 1.26331700  | 2.21190500  | -4.59396500 |
| H  | -0.91607000 | 3.43675400  | -4.67428800 |
| C  | -0.07873000 | -0.48744100 | -1.06518000 |
| C  | -0.70859800 | -1.67754500 | -1.13166200 |
| C  | -1.88886200 | -2.11707400 | -1.94569600 |
| H  | -2.72600400 | -1.41403300 | -1.80824600 |
| H  | -1.68880200 | -2.18338900 | -3.02059100 |
| N  | -2.18703900 | -3.46585400 | -1.39924200 |
| C  | -1.55686300 | -3.60780600 | -0.07047000 |
| H  | -1.39988100 | -4.66330000 | 0.15760500  |
| H  | -2.17731700 | -3.15936700 | 0.72450400  |
| C  | -0.27877300 | -2.79627800 | -0.23103700 |
| C  | 0.37364700  | -2.24969400 | 1.01581800  |
| H  | 0.44380300  | -3.40835400 | -0.79611200 |
| H  | 1.15846200  | -2.91134500 | 1.39626100  |
| H  | -0.35767500 | -2.09564900 | 1.81757200  |
| S  | -3.76756100 | -4.00189900 | -1.53535700 |
| O  | -3.78369000 | -5.34464800 | -0.96171000 |
| O  | -4.16526400 | -3.75191100 | -2.91837600 |
| C  | -4.72225800 | -2.94094800 | -0.48073300 |
| C  | -4.79090500 | -3.21328700 | 0.88735200  |
| C  | -5.31537200 | -1.79321100 | -1.00969000 |

|   |             |             |             |
|---|-------------|-------------|-------------|
| C | -5.43929700 | -2.31475100 | 1.72722400  |
| H | -4.35506100 | -4.12618000 | 1.28278900  |
| C | -5.97545100 | -0.91747800 | -0.15687600 |
| H | -5.27482300 | -1.60572700 | -2.07909100 |
| C | -6.02902300 | -1.14960600 | 1.22402600  |
| H | -5.49382900 | -2.52213600 | 2.79338500  |
| H | -6.45284200 | -0.03035500 | -0.56776600 |
| C | -6.67961800 | -0.15852600 | 2.13489800  |
| H | -6.06784200 | 0.74819200  | 2.22299700  |
| H | -6.81759400 | -0.56097000 | 3.14118700  |
| H | -7.65519000 | 0.16019700  | 1.75544300  |
| C | 4.72744100  | -2.30316300 | -0.66625600 |
| C | 4.33925700  | -2.13085700 | -2.01662700 |
| C | 5.20825600  | -2.49524700 | -3.05214100 |
| C | 6.46100600  | -2.99290200 | -2.72891300 |
| C | 6.85573700  | -3.10772700 | -1.38917300 |
| C | 6.00725900  | -2.76028700 | -0.34281200 |
| C | 2.64114900  | -1.34256500 | -0.71837500 |
| C | 3.04389100  | -1.53129300 | -2.01625000 |
| H | 4.90291100  | -2.37207000 | -4.08760800 |
| H | 7.15008700  | -3.28061100 | -3.51772500 |
| H | 7.85159800  | -3.47070200 | -1.15216800 |
| H | 6.36940400  | -2.83530000 | 0.67367200  |
| H | 1.37419300  | -1.11239800 | -0.86090800 |
| H | 2.45053700  | -1.30922400 | -2.89237000 |
| N | 3.65308600  | -1.86324100 | 0.12793800  |
| C | 3.57868400  | -1.77097300 | 1.50766400  |
| C | 4.41299900  | -2.47063400 | 2.38566800  |
| N | 2.58567800  | -0.97378500 | 1.96073400  |
| C | 4.25481500  | -2.29184300 | 3.74943000  |
| H | 5.13475300  | -3.18010400 | 2.01044400  |
| C | 2.44390300  | -0.82560400 | 3.28742100  |
| C | 3.26207500  | -1.43556000 | 4.21864800  |
| H | 4.89303700  | -2.83516500 | 4.43897300  |
| H | 1.62397000  | -0.18976700 | 3.58865800  |
| H | 3.09883600  | -1.26521300 | 5.27659600  |
| O | -2.52732900 | 0.91717500  | -1.22899000 |
| C | -3.77457100 | 1.59016700  | -1.27107700 |
| H | -4.30941300 | 1.38508700  | -2.20723700 |
| H | -4.35178800 | 1.20434900  | -0.42962200 |
| H | -3.65686200 | 2.67269900  | -1.15325700 |

**TS2S-OMe**

Zero-point correction=

1.001892 (Hartree/Particle)

|                                              |             |                  |              |
|----------------------------------------------|-------------|------------------|--------------|
| Thermal correction to Energy=                |             |                  | 1.061264     |
| Thermal correction to Enthalpy=              |             |                  | 1.062208     |
| Thermal correction to Gibbs Free Energy=     |             |                  | 0.912223     |
| Sum of electronic and zero-point Energies=   |             |                  | -3703.753432 |
| Sum of electronic and thermal Energies=      |             |                  | -3703.694059 |
| Sum of electronic and thermal Enthalpies=    |             |                  | -3703.693115 |
| Sum of electronic and thermal Free Energies= |             |                  | -3703.843100 |
| Imaginary frequency=                         | -1109.77    | cm <sup>-1</sup> |              |
| C                                            | 4.48554200  | -6.36429700      | -0.15993600  |
| C                                            | 3.27967100  | -5.75776800      | -0.42437700  |
| C                                            | 3.18455700  | -4.34841000      | -0.38371300  |
| C                                            | 4.34154000  | -3.57087100      | -0.07203800  |
| C                                            | 5.56579900  | -4.22179000      | 0.20069100   |
| C                                            | 5.63031200  | -5.59496800      | 0.15495100   |
| H                                            | 4.56485500  | -7.44681300      | -0.19071800  |
| H                                            | 2.38913800  | -6.33138500      | -0.66519200  |
| H                                            | 6.43387800  | -3.61396600      | 0.43959700   |
| H                                            | 6.56907600  | -6.10054300      | 0.36167800   |
| C                                            | 3.11306700  | -1.64752900      | -0.28636800  |
| C                                            | 1.95434600  | -2.42351300      | -0.59171000  |
| N                                            | 4.27909800  | -2.21368200      | -0.04154300  |
| N                                            | 1.99467700  | -3.74209500      | -0.63810100  |
| P                                            | 2.95831300  | 0.18756900       | -0.36963200  |
| P                                            | 0.32767100  | -1.61158200      | -0.94224200  |
| C                                            | 3.76390100  | 0.41603800       | -2.00398600  |
| H                                            | 4.81029600  | 0.09995400       | -1.95805500  |
| H                                            | 3.71756700  | 1.45839300       | -2.32639400  |
| H                                            | 3.26321900  | -0.19684500      | -2.75827500  |
| C                                            | -0.69825800 | -2.55537500      | 0.24945500   |
| H                                            | -0.41060500 | -3.60708700      | 0.17428400   |
| H                                            | -1.76501700 | -2.46665100      | 0.03089900   |
| H                                            | -0.50131800 | -2.20887900      | 1.26162700   |
| C                                            | -0.16449200 | -2.41701700      | -2.61327800  |
| C                                            | 1.07461300  | -2.55140800      | -3.50456200  |
| C                                            | -1.23449700 | -1.55196000      | -3.28271900  |
| C                                            | -0.75921300 | -3.81371100      | -2.41953600  |
| H                                            | 1.67761500  | -3.41526900      | -3.21138900  |
| H                                            | 1.73984500  | -1.68224400      | -3.48112500  |
| H                                            | 0.76475000  | -2.70204300      | -4.54492500  |
| H                                            | -2.12433900 | -1.44398400      | -2.65163300  |
| H                                            | -1.55569500 | -2.04260200      | -4.20909400  |
| H                                            | -0.88403600 | -0.55162300      | -3.54700000  |
| H                                            | -0.96037700 | -4.23591400      | -3.41185700  |
| H                                            | -1.70876200 | -3.79038800      | -1.87679200  |

|    |             |             |             |
|----|-------------|-------------|-------------|
| H  | -0.07188100 | -4.48739900 | -1.90244400 |
| C  | 4.22962000  | 0.99288000  | 0.78411800  |
| C  | 5.61571200  | 0.34557800  | 0.78928900  |
| C  | 3.68368800  | 0.97743500  | 2.20678500  |
| C  | 4.38728800  | 2.43246800  | 0.27554700  |
| H  | 6.03421400  | 0.20874300  | -0.21205500 |
| H  | 5.61976400  | -0.62355700 | 1.28937400  |
| H  | 6.29186800  | 1.01591800  | 1.33524000  |
| H  | 2.69090700  | 1.42891800  | 2.27817400  |
| H  | 4.35713500  | 1.54094800  | 2.86366600  |
| H  | 3.62312800  | -0.04413100 | 2.59506600  |
| H  | 4.91660000  | 3.02016900  | 1.03444900  |
| H  | 3.43499300  | 2.93226000  | 0.08309800  |
| H  | 4.98329600  | 2.46822400  | -0.64151900 |
| Co | 0.58994400  | 0.74698800  | -0.52592000 |
| C  | 1.47363900  | -0.54373900 | 4.50791300  |
| C  | 1.03923900  | -0.56432400 | 3.18037000  |
| C  | 0.13732700  | 0.40627300  | 2.69831500  |
| C  | -0.31131300 | 1.37694000  | 3.60962500  |
| C  | 0.11528800  | 1.40634900  | 4.93314300  |
| C  | 1.01481700  | 0.44245600  | 5.37740400  |
| H  | 2.17721100  | -1.28835300 | 4.86425700  |
| H  | -1.01289800 | 2.12661900  | 3.24931100  |
| H  | -0.25382700 | 2.17259300  | 5.60824000  |
| H  | 1.36459500  | 0.44846600  | 6.40594800  |
| C  | -0.39250200 | 0.41831400  | 1.32112400  |
| C  | -1.70694600 | 0.23781400  | 1.08732500  |
| C  | -2.83990000 | -0.09599600 | 2.01928600  |
| H  | -2.76611400 | -1.09487900 | 2.46381900  |
| H  | -2.91571900 | 0.61233500  | 2.85179400  |
| N  | -4.07128000 | 0.02361600  | 1.18421500  |
| C  | -3.69382000 | 0.80829000  | -0.02056600 |
| H  | -3.75515300 | 1.87235500  | 0.23794100  |
| H  | -4.39103100 | 0.61648900  | -0.84052700 |
| C  | -2.25214700 | 0.37735800  | -0.29231600 |
| C  | -1.31459200 | 1.20286700  | -1.11856800 |
| H  | -2.31773200 | -0.63303900 | -0.72125800 |
| H  | -1.44385900 | 2.27805900  | -0.93112500 |
| H  | -1.40944900 | 1.02482500  | -2.19224400 |
| S  | -4.81025600 | -1.45915200 | 0.81927700  |
| O  | -4.88587700 | -2.18000500 | 2.09036900  |
| O  | -4.20042200 | -2.12456000 | -0.34357500 |
| C  | -6.42472900 | -0.91328900 | 0.33299200  |
| C  | -7.30219500 | -0.43774100 | 1.30910300  |

|   |              |             |             |
|---|--------------|-------------|-------------|
| C | -6.80335500  | -0.98245000 | -1.00433600 |
| C | -8.57058100  | -0.02653100 | 0.92903000  |
| H | -6.99233700  | -0.39664800 | 2.34928000  |
| C | -8.07892200  | -0.56063500 | -1.36731400 |
| H | -6.10710900  | -1.36477800 | -1.74434900 |
| C | -8.97954600  | -0.07818700 | -0.41269800 |
| H | -9.26227700  | 0.34229700  | 1.68266700  |
| H | -8.38229000  | -0.60868800 | -2.41021000 |
| C | -10.34782000 | 0.37949700  | -0.80414600 |
| H | -10.53766600 | 0.22333000  | -1.86863600 |
| H | -10.48419600 | 1.44543000  | -0.59151900 |
| H | -11.12272100 | -0.14996800 | -0.24041100 |
| C | 1.37169700   | 4.78273300  | -0.44674800 |
| C | 1.46036400   | 4.68544800  | 0.96505000  |
| C | 1.83777500   | 5.79940200  | 1.72547500  |
| C | 2.14337700   | 6.98244600  | 1.07122100  |
| C | 2.09239300   | 7.05487300  | -0.32789100 |
| C | 1.71705900   | 5.96411400  | -1.10649900 |
| C | 0.89071700   | 2.62283300  | 0.18248500  |
| C | 1.16133900   | 3.33859700  | 1.32500400  |
| H | 1.89875300   | 5.72387300  | 2.80759200  |
| H | 2.43642900   | 7.85816700  | 1.64271600  |
| H | 2.35475200   | 7.98353300  | -0.82658700 |
| H | 1.71950200   | 6.06150400  | -2.18384100 |
| H | 0.00504800   | 1.72071300  | 0.59994400  |
| H | 1.12647500   | 2.94695900  | 2.33163900  |
| N | 0.97220200   | 3.52030600  | -0.91376400 |
| C | 0.94916800   | 3.03360300  | -2.21137900 |
| C | 0.85290700   | 3.84004800  | -3.34961900 |
| N | 1.00417800   | 1.68466500  | -2.29562300 |
| C | 0.89250700   | 3.24306500  | -4.59829200 |
| H | 0.70567100   | 4.90632200  | -3.25744100 |
| C | 1.04441100   | 1.12879000  | -3.51779000 |
| C | 1.01753800   | 1.85934500  | -4.69168100 |
| H | 0.81731800   | 3.85673100  | -5.49027100 |
| H | 1.10895700   | 0.04894600  | -3.53394700 |
| H | 1.06749900   | 1.34934200  | -5.64668700 |
| O | 1.45150800   | -1.49939700 | 2.27777000  |
| C | 2.17961200   | -2.61158000 | 2.78338100  |
| H | 2.21455900   | -3.34623600 | 1.97755300  |
| H | 3.20226400   | -2.33376200 | 3.06944100  |
| H | 1.67129100   | -3.06137000 | 3.64287300  |
